# Supplementary material for: Secreted primary human malignant mesothelioma exosome signature reflects oncogenic cargo
Source: PubMed Central journal article supplement (PMC5015102; doi:10.1038/srep32643), 2016-09-08
Supplement: srep32643-s1.pdf [file srep32643-s1.pdf]

## Supplementary Information

### Secreted primary human malignant mesothelioma exosome signature reflects oncogenic cargo

David W. Greening<sup>1,\*</sup>, Hong Ji<sup>1</sup>, Maoshan Chen<sup>1</sup>, Bruce W. S. Robinson<sup>2,3</sup>, Ian M. Dick<sup>2</sup>, Jenette Creaney<sup>2,4</sup>, Richard J. Simpson<sup>1</sup>

<sup>1</sup> *Department of Biochemistry and Genetics, La Trobe Institute for Molecular Science, La Trobe University, Melbourne, Victoria 3086, Australia*

<sup>2</sup> *National Centre for Asbestos Related Diseases, School of Medicine and Pharmacology, University of Western Australia, 6009, Australia*

<sup>3</sup> *Department of Respiratory Medicine, Sir Charles Gairdner Hospital, Perth, Western Australia, 6009, Australia*

<sup>4</sup> *Australian Mesothelioma Tissue Bank, Sir Charles Gairdner Hospital, Perth, Western Australia, 6009, Australia*

#### **\* To whom correspondence should be addressed:**

Dr. David W. Greening

La Trobe Institute for Molecular Science

La Trobe University

Bundoora, Victoria 3086, Australia

Tel: +61 03 9479 5031

Email: [d.greening@latrobe.edu.au](mailto:d.greening@latrobe.edu.au)

**Figure S1**

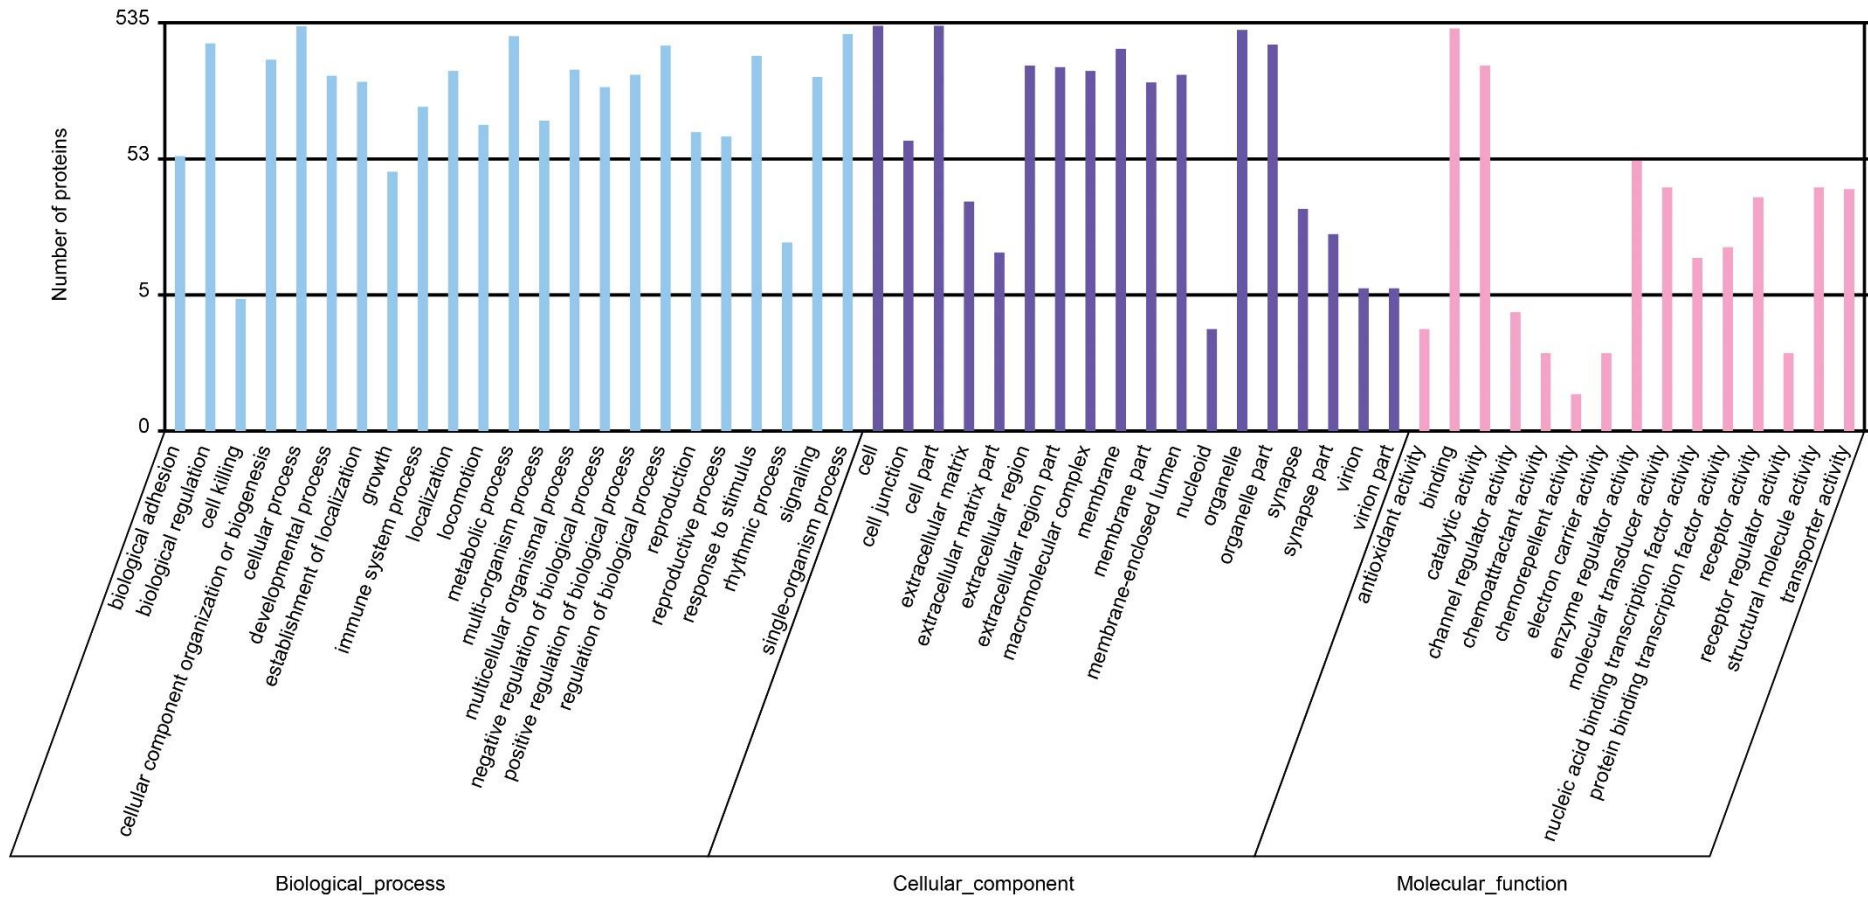

**Figure S1. Gene Ontology assignment of the proteins identified in mEXOS, revealing enriched categories associated with biological process, cellular component and molecular function.**

**Table S1. Proteins commonly identified in all mesothelioma cell-derived exosomes.**

| Gene symbol  | Gene Name    | Protein Accession | Protein Description                                                    | Coverage (%) | SpC Combined (4 cell lines) | JO3 8 SpC | JU7 7 SpC | LO6 8 SpC | OLD161 2 SpC | Vesiclepedia |
|--------------|--------------|-------------------|------------------------------------------------------------------------|--------------|-----------------------------|-----------|-----------|-----------|--------------|--------------|
| KPYM_HUMAN   | PKM          | P14618            | Pyruvate kinase PKM (EC 2.7.1.40) (Cytosolic thyroid hormone-binding p | 61.2         | 824                         | 114       | 120       | 192       | 414          | Y            |
| DYHC1_HUMAN  | DYNC1H1      | Q14204            | Cytoplasmic dynein 1 heavy chain 1 (Cytoplasmic dynein heavy chain 1)  | 30.2         | 750                         | 198       | 71        | 175       | 320          | Y            |
| ANXA2_HUMAN  | ANXA2        | P07355            | Annexin A2 (Annexin II) (Annexin-2) (Calpactin I heavy chain) (Calpact | 74.9         | 643                         | 172       | 199       | 163       | 116          | Y            |
| ACTB_HUMAN   | ACTB         | P60709            | Actin, cytoplasmic 1 (Beta-actin) [Cleaved into: Actin, cytoplasmic 1, | 49.1         | 640                         | 173       | 121       | 133       | 223          | Y            |
| TBB5_HUMAN   | TUBB         | P07437            | Tubulin beta chain (Tubulin beta-5 chain)                              | 48.9         | 637                         | 150       | 88        | 136       | 276          | Y            |
| Q8IWP6_HUMAN | Q8IWP6_HUMAN | Q8IWP6            | Class IVb beta tubulin                                                 | 48.8         | 544                         | 127       | 71        | 116       | 239          |              |
| TBB2A_HUMAN  | TUBB2A       | Q13885            | Tubulin beta-2A chain (Tubulin beta class IIa)                         | 48.8         | 540                         | 124       | 70        | 125       | 238          | Y            |
| HSP7C_HUMAN  | HSPA8        | P11142            | Heat shock cognate 71 kDa protein (Heat shock 70 kDa protein 8)        | 42.7         | 529                         | 143       | 126       | 134       | 124          | Y            |
| FLNA_HUMAN   | FLNA         | P21333            | Filamin-A (FLN-A) (Actin-binding protein 280) (ABP-280) (Alpha-filamin | 33.1         | 509                         | 158       | 80        | 170       | 109          | Y            |
| FAS_HUMAN    | FASN         | P49327            | Fatty acid synthase (EC 2.3.1.85) [Includes: [Acyl-carrier-protein] S- | 30.7         | 506                         | 164       | 61        | 196       | 87           | Y            |
| HS90B_HUMAN  | HSP90AB1     | P08238            | Heat shock protein HSP 90-beta (HSP 90) (Heat shock 84 kDa) (HSP 84)   | 40.6         | 498                         | 141       | 102       | 136       | 121          | Y            |
| HS90A_HUMAN  | HSP90AA1     | P07900            | Heat shock protein HSP 90-alpha (Heat shock 86 kDa) (HSP 86) (HSP86)   | 39.9         | 489                         | 125       | 118       | 118       | 129          | Y            |
| PLEC_HUMAN   | PLEC         | Q15149            | Plectin (PCN) (PLTN) (Hemidesmosomal protein 1) (HD1) (Plectin-1)      | 26.3         | 482                         | 207       | 47        | 153       | 84           | Y            |
| CLH1_HUMAN   | CLTC         | Q00610            | Clathrin heavy chain 1 (Clathrin heavy chain on chromosome 17) (CLH-17 | 30.7         | 473                         | 166       | 70        | 141       | 100          | Y            |
| Q4LE36_HUMAN | ACYL         | Q4LE36            | ACYL variant protein (Fragment)                                        | 50.7         | 473                         | 130       | 41        | 251       | 54           | Y            |
| TBB4A_HUMAN  | TUBB4A       | P04350            | Tubulin beta-4A chain (Tubulin 5 beta) (Tubulin beta-4 chain)          | 44.4         | 470                         | 110       | 62        | 99        | 205          | Y            |
| B4DVE1_HUMAN | B4DVE1_HUMAN | B4DVE1            | cDNA FLJ53478, highly similar to Galectin-3-binding protein            | 36.6         | 465                         | 178       | 94        | 135       | 60           |              |
| B3KPS3_HUMAN | B3KPS3_HUMAN | B3KPS3            | cDNA FLJ32131 fis, clone PEBLM2000267, highly similar to Tubulin alpha | 48.3         | 455                         | 113       | 58        | 111       | 177          |              |
| IQGA1_HUMAN  | IQGAP1       | P46940            | Ras GTPase-activating-like protein IQGAP1 (p195)                       | 27.5         | 418                         | 118       | 119       | 71        | 112          | Y            |
| ACTN4_HUMAN  | ACTN4        | O43707            | Alpha-actinin-4 (F-actin cross-linking protein) (Non-muscle alpha-acti | 48.2         | 406                         | 108       | 96        | 124       | 83           | Y            |
| MOES_HUMAN   | MSN          | P26038            | Moesin (Membrane-organizing extension spike protein)                   | 53.6         | 405                         | 149       | 94        | 39        | 128          | Y            |
| TBB3_HUMAN   | TUBB3        | Q13509            | Tubulin beta-3 chain (Tubulin beta-4 chain) (Tubulin beta-III)         | 43.6         | 403                         | 97        | 50        | 103       | 156          | Y            |
| MYH9_HUMAN   | MYH9         | P35579            | Myosin-9 (Cellular myosin heavy chain, type A) (Myosin heavy chain 9)  | 35.3         | 397                         | 194       | 63        | 28        | 118          | Y            |

|              |         |        |                                                                         |      |     |     |     |     |     |   |
|--------------|---------|--------|-------------------------------------------------------------------------|------|-----|-----|-----|-----|-----|---|
| FLNB_HUMAN   | FLNB    | O75369 | Filamin-B (FLN-B) (ABP-278) (ABP-280 homolog) (Actin-binding-like prot  | 28.5 | 372 | 146 | 33  | 129 | 72  | Y |
| TBB6_HUMAN   | TUBB6   | Q9BUF5 | Tubulin beta-6 chain (Tubulin beta class V)                             | 37.2 | 364 | 93  | 45  | 73  | 166 | Y |
| EF2_HUMAN    | EEF2    | P13639 | Elongation factor 2 (EF-2)                                              | 38.9 | 358 | 81  | 44  | 97  | 140 | Y |
| MYOF_HUMAN   | MYOF    | Q9NZM1 | Myoferlin (Fer-1-like protein 3)                                        | 32.9 | 355 | 150 | 120 | 19  | 69  | Y |
| ACTBL_HUMAN  | ACTBL2  | Q562R1 | Beta-actin-like protein 2 (Kappa-actin)                                 | 24.5 | 354 | 94  | 74  | 74  | 112 | Y |
| ANXA5_HUMAN  | ANXA5   | P08758 | Annexin A5 (Anchoring CII) (Annexin V) (Annexin-5) (Calphobindin I) (CB | 66.3 | 351 | 100 | 90  | 96  | 71  | Y |
| PGBM_HUMAN   | HSPG2   | P98160 | Basement membrane-specific heparan sulfate proteoglycan core protein (  | 17.8 | 342 | 150 | 34  | 159 | 2   | Y |
| HSP71_HUMAN  | HSPA1A  | P08107 | Heat shock 70 kDa protein 1A/1B (Heat shock 70 kDa protein 1/2) (HSP70  | 39.6 | 327 | 62  | 53  | 113 | 98  | Y |
| AT1A1_HUMAN  | ATP1A1  | P05023 | Sodium/potassium-transporting ATPase subunit alpha-1 (Na(+)/K(+) ATPas  | 37.5 | 317 | 149 | 63  | 20  | 89  | Y |
| ENOA_HUMAN   | ENO1    | P06733 | Alpha-enolase (EC 4.2.1.11) (2-phospho-D-glycerate hydro-lyase) (C-myc  | 46.8 | 307 | 87  | 60  | 75  | 94  | Y |
| GRP78_HUMAN  | HSPA5   | P11021 | 78 kDa glucose-regulated protein (GRP-78) (Endoplasmic reticulum lumen  | 38.1 | 295 | 99  | 98  | 58  | 45  | Y |
| COCA1_HUMAN  | COL12A1 | Q99715 | Collagen alpha-1(XII) chain                                             | 21.7 | 291 | 160 | 68  | 21  | 44  | Y |
| ACTN1_HUMAN  | ACTN1   | P12814 | Alpha-actinin-1 (Alpha-actinin cytoskeletal isoform) (F-actin cross-li  | 44.7 | 288 | 114 | 72  | 44  | 64  | Y |
| MVP_HUMAN    | MVP     | Q14764 | Major vault protein (MVP) (Lung resistance-related protein)             | 42.8 | 274 | 48  | 36  | 163 | 31  | Y |
| PDC6L_HUMAN  | PDCD6IP | Q8WUM4 | Programmed cell death 6-interacting protein (PDCD6-interacting protein  | 42.7 | 273 | 59  | 70  | 99  | 49  | Y |
| AHNK_HUMAN   | AHNAK   | Q09666 | Neuroblast differentiation-associated protein AHNAK (Desmoyokin)        | 14.9 | 270 | 84  | 74  | 10  | 110 | Y |
| ANXA1_HUMAN  | ANXA1   | P04083 | Annexin A1 (Annexin I) (Annexin-1) (Calpactin II) (Calpactin-2) (Chrom  | 61.6 | 268 | 104 | 35  | 77  | 56  | Y |
| EF1A1_HUMAN  | EEF1A1  | P68104 | Elongation factor 1-alpha 1 (EF-1-alpha-1) (Elongation factor Tu) (EF-  | 29.7 | 265 | 68  | 40  | 64  | 102 | Y |
| G3P_HUMAN    | GAPDH   | P04406 | Glyceraldehyde-3-phosphate dehydrogenase (GAPDH) (EC 1.2.1.12) (Peptid  | 43   | 262 | 95  | 25  | 79  | 69  | Y |
| MYO1C_HUMAN  | MYO1C   | O00159 | Unconventional myosin-Ic (Myosin I beta) (MMI-beta) (MMIb)              | 31.1 | 261 | 74  | 80  | 18  | 89  | Y |
| RADI_HUMAN   | RDX     | P35241 | Radixin                                                                 | 52.5 | 257 | 57  | 40  | 26  | 141 | Y |
| AGRIN_HUMAN  | AGRN    | O00468 | Agrin [Cleaved into: Agrin N-terminal 110 kDa subunit; Agrin C-termina  | 17.3 | 245 | 69  | 37  | 113 | 28  | Y |
| TERA_HUMAN   | VCP     | P55072 | Transitional endoplasmic reticulum ATPase (TER ATPase) (EC 3.6.4.6) (1  | 36.5 | 241 | 63  | 24  | 95  | 61  | Y |
| B2R6J2_HUMAN | VIL2    | B2R6J2 | Villin 2 (ezrin) (VIL2)                                                 | 39.6 | 238 | 78  | 52  | 34  | 78  |   |
| ITA3_HUMAN   | ITGA3   | P26006 | Integrin alpha-3 (CD49 antigen-like family member C) (FRP-2) (Galactop  | 21.9 | 227 | 79  | 64  | 13  | 73  | Y |
| K6PP_HUMAN   | PFKP    | Q01813 | 6-phosphofructokinase type C (EC 2.7.1.11) (6-phosphofructokinase, pla  | 29.2 | 219 | 70  | 21  | 60  | 72  | Y |
| TLN1_HUMAN   | TLN1    | Q9Y490 | Talin-1                                                                 | 17.3 | 214 | 93  | 26  | 41  | 56  | Y |

|              |              |        |                                                                         |      |     |    |    |     |    |   |
|--------------|--------------|--------|-------------------------------------------------------------------------|------|-----|----|----|-----|----|---|
| LAMC1_HUMAN  | LAMC1        | P11047 | Laminin subunit gamma-1 (Laminin B2 chain) (Laminin-1 subunit gamma) (  | 21.5 | 210 | 78 | 29 | 100 | 3  | Y |
| EHD1_HUMAN   | EHD1         | Q9H4M9 | EH domain-containing protein 1 (PAST homolog 1) (hPAST1) (Testilin)     | 44   | 206 | 77 | 60 | 22  | 50 | Y |
| A6NN80_HUMAN | ANXA6        | A6NN80 | Annexin A6                                                              | 42.1 | 205 | 73 | 70 | 21  | 45 | Y |
| A8K7F6_HUMAN | A8K7F6_HUMAN | A8K7F6 | cDNA FLJ78244, highly similar to Homo sapiens eukaryotic translation i  | 45.3 | 202 | 50 | 28 | 46  | 79 |   |
| Q06AH7_HUMAN | TF           | Q06AH7 | Transferrin                                                             | 38.4 | 202 | 58 | 26 | 104 | 17 | Y |
| 4F2_HUMAN    | SLC3A2       | P08195 | 4F2 cell-surface antigen heavy chain (4F2hc) (4F2 heavy chain antigen)  | 34.6 | 196 | 71 | 44 | 48  | 34 | Y |
| A8K8D9_HUMAN | A8K8D9_HUMAN | A8K8D9 | Glucose-6-phosphate 1-dehydrogenase (EC 1.1.1.49)                       | 57.9 | 190 | 57 | 10 | 107 | 22 |   |
| UBA1_HUMAN   | UBA1         | P22314 | Ubiquitin-like modifier-activating enzyme 1 (Protein A1S9) (Ubiquitin-  | 24.1 | 188 | 48 | 34 | 67  | 43 | Y |
| F8VPD4_HUMAN | CAD          | F8VPD4 | CAD protein                                                             | 16.6 | 183 | 52 | 5  | 61  | 65 | Y |
| 5NTD_HUMAN   | NT5E         | P21589 | 5'-nucleotidase (5'-NT) (EC 3.1.3.5) (Ecto-5'-nucleotidase) (CD antige  | 34.1 | 181 | 83 | 17 | 12  | 76 | Y |
| A8K6Q8_HUMAN | A8K6Q8_HUMAN | A8K6Q8 | cDNA FLJ75881, highly similar to Homo sapiens transferrin receptor (p9  | 35.9 | 181 | 73 | 45 | 20  | 45 |   |
| VIME_HUMAN   | VIM          | P08670 | Vimentin                                                                | 54.3 | 180 | 42 | 34 | 46  | 61 | Y |
| PGK1_HUMAN   | PGK1         | P00558 | Phosphoglycerate kinase 1 (EC 2.7.2.3) (Cell migration-inducing gene 1  | 55.9 | 180 | 64 | 22 | 58  | 38 | Y |
| C1TC_HUMAN   | MTHFD1       | P11586 | C-1-tetrahydrofolate synthase, cytoplasmic (C1-THF synthase) [Cleaved   | 35.5 | 172 | 34 | 16 | 38  | 89 | Y |
| IMB1_HUMAN   | KPNB1        | Q14974 | Importin subunit beta-1 (Importin-90) (Karyopherin subunit beta-1) (Nu  | 26.5 | 168 | 47 | 27 | 52  | 42 | Y |
| ANXA4_HUMAN  | ANXA4        | P09525 | Annexin A4 (35-beta calcimedlin) (Annexin IV) (Annexin-4) (Carbohydrate | 61.4 | 167 | 41 | 28 | 76  | 23 | Y |
| XRCC6_HUMAN  | XRCC6        | P12956 | X-ray repair cross-complementing protein 6 (EC 3.6.4.-) (EC 4.2.99.-)   | 31.7 | 166 | 37 | 6  | 74  | 50 | Y |
| PROF1_HUMAN  | PFN1         | P07737 | Profilin-1 (Epididymis tissue protein Li 184a) (Profilin I)             | 67.1 | 164 | 44 | 26 | 53  | 44 | Y |
| Q59E99_HUMAN | Q59E99_HUMAN | Q59E99 | Thrombospondin 1 variant (Fragment)                                     | 21.6 | 164 | 39 | 22 | 88  | 16 |   |
| H2B1D_HUMAN  | HIST1H2BD    | P58876 | Histone H2B type 1-D (HIRA-interacting protein 2) (Histone H2B.1 B) (H  | 58.7 | 163 | 32 | 23 | 30  | 78 | Y |
| SYAC_HUMAN   | AARS         | P49588 | Alanine--tRNA ligase, cytoplasmic (EC 6.1.1.7) (Alanyl-tRNA synthetase  | 26.3 | 158 | 41 | 9  | 51  | 57 | Y |
| H4_HUMAN     | HIST1H4A     | P62805 | Histone H4                                                              | 58.3 | 152 | 31 | 20 | 22  | 86 | Y |
| GNAI2_HUMAN  | GNAI2        | P04899 | Guanine nucleotide-binding protein G(i) subunit alpha-2 (Adenylate cyc  | 37.5 | 150 | 43 | 38 | 3   | 66 | Y |
| PABP1_HUMAN  | PABPC1       | P11940 | Polyadenylate-binding protein 1 (PABP-1) (Poly(A)-binding protein 1)    | 32.1 | 150 | 57 | 17 | 35  | 44 | Y |
| ITB1_HUMAN   | ITGB1        | P05556 | Integrin beta-1 (Fibronectin receptor subunit beta) (Glycoprotein IIa)  | 16.3 | 149 | 43 | 46 | 16  | 46 | Y |
| XPO2_HUMAN   | CSE1L        | P55060 | Exportin-2 (Exp2) (Cellular apoptosis susceptibility protein) (Chromos  | 23.9 | 144 | 38 | 18 | 44  | 44 | Y |
| COPA_HUMAN   | COPA         | P53621 | Coatomer subunit alpha (Alpha-coat protein) (Alpha-COP) (HEP-COP) (HEP  | 22.9 | 143 | 40 | 18 | 30  | 56 | Y |

|              |              |        |                                                                           |      |     |    |    |    |    |   |
|--------------|--------------|--------|---------------------------------------------------------------------------|------|-----|----|----|----|----|---|
| HSP74_HUMAN  | HSPA4        | P34932 | Heat shock 70 kDa protein 4 (HSP70RY) (Heat shock 70-related protein A)   | 23.2 | 143 | 38 | 23 | 43 | 39 | Y |
| XPO1_HUMAN   | XPO1         | O14980 | Exportin-1 (Exp1) (Chromosome region maintenance 1 protein homolog)       | 24   | 142 | 39 | 10 | 52 | 42 | Y |
| Q59GM9_HUMAN | Q59GM9_HUMAN | Q59GM9 | Phosphorylase (EC 2.4.1.1) (Fragment)                                     | 28.7 | 139 | 20 | 4  | 53 | 66 |   |
| STAT1_HUMAN  | STAT1        | P42224 | Signal transducer and activator of transcription 1-alpha/beta (Transcr    | 34.9 | 139 | 83 | 6  | 34 | 21 | Y |
| ATPB_HUMAN   | ATP5B        | P06576 | ATP synthase subunit beta, mitochondrial (EC 3.6.3.14)                    | 38.4 | 136 | 10 | 8  | 63 | 60 | Y |
| G3XAI2_HUMAN | LAMB1        | G3XAI2 | Laminin subunit beta-1 (Laminin, beta 1, isoform CRA_a)                   | 18.4 | 136 | 42 | 7  | 90 | 1  | Y |
| I433E_HUMAN  | YWHAE        | P62258 | 14-3-3 protein epsilon (14-3-3E)                                          | 59.6 | 135 | 34 | 30 | 14 | 58 | Y |
| EIF3A_HUMAN  | EIF3A        | Q14152 | Eukaryotic translation initiation factor 3 subunit A (eIF3a) (Eukaryot    | 17.2 | 134 | 42 | 15 | 39 | 39 | Y |
| LDHA_HUMAN   | LDHA         | P00338 | L-lactate dehydrogenase A chain (LDH-A) (EC 1.1.1.27) (Cell proliferat    | 45.5 | 134 | 50 | 24 | 25 | 37 | Y |
| PPIA_HUMAN   | PPIA         | P62937 | Peptidyl-prolyl cis-trans isomerase A (PPIase A) (EC 5.2.1.8) (Cycloph    | 58.2 | 134 | 42 | 29 | 30 | 35 | Y |
| PUR9_HUMAN   | ATIC         | P31939 | Bifunctional purine biosynthesis protein PURH [Includes: Phosphoribosy    | 39.5 | 133 | 43 | 10 | 46 | 37 | Y |
| VINC_HUMAN   | VCL          | P18206 | Vinculin (Metavinculin) (MV)                                              | 28.8 | 132 | 65 | 17 | 10 | 44 | Y |
| Q8N9M2_HUMAN | Q8N9M2_HUMAN | Q8N9M2 | cDNA FLJ36887 fis, clone BNGH42005504, highly similar to 26S<br>PROTEASOM | 36.1 | 131 | 41 | 20 | 34 | 36 |   |
| PSMD2_HUMAN  | PSMD2        | Q13200 | 26S proteasome non-ATPase regulatory subunit 2 (26S proteasome<br>regulat | 27.8 | 130 | 38 | 9  | 44 | 41 | Y |
| STOM_HUMAN   | STOM         | P27105 | Erythrocyte band 7 integral membrane protein (Protein 7.2b) (Stomatin)    | 45.8 | 128 | 55 | 40 | 21 | 13 | Y |
| PRS6A_HUMAN  | PSMC3        | P17980 | 26S protease regulatory subunit 6A (26S proteasome AAA-ATPase<br>subunit  | 36.2 | 127 | 41 | 13 | 31 | 44 | Y |
| LDHB_HUMAN   | LDHB         | P07195 | L-lactate dehydrogenase B chain (LDH-B) (EC 1.1.1.27) (LDH heart<br>subun | 48.5 | 127 | 50 | 13 | 23 | 44 | Y |
| PSD11_HUMAN  | PSMD11       | O00231 | 26S proteasome non-ATPase regulatory subunit 11 (26S proteasome<br>regula | 35.3 | 126 | 39 | 11 | 43 | 36 | Y |
| TCPB_HUMAN   | CCT2         | P78371 | T-complex protein 1 subunit beta (TCP-1-beta) (CCT-beta)                  | 38.9 | 126 | 42 | 17 | 41 | 26 | Y |
| PLST_HUMAN   | PLS3         | P13797 | Plastin-3 (T-plastin)                                                     | 33.7 | 125 | 48 | 44 | 8  | 28 | Y |
| SF3B3_HUMAN  | SF3B3        | Q15393 | Splicing factor 3B subunit 3 (Pre-mRNA-splicing factor SF3b 130 kDa su    | 20.4 | 124 | 15 | 13 | 54 | 46 | Y |
| EPHA2_HUMAN  | EPHA2        | P29317 | Ephrin type-A receptor 2 (EC 2.7.10.1) (Epithelial cell kinase) (Tyros    | 23.1 | 123 | 53 | 26 | 7  | 41 | Y |
| EF1G_HUMAN   | EEF1G        | P26641 | Elongation factor 1-gamma (EF-1-gamma) (eEF-1B gamma)                     | 24.5 | 122 | 31 | 19 | 36 | 38 | Y |
| B4DE36_HUMAN | B4DE36_HUMAN | B4DE36 | Glucose-6-phosphate isomerase (EC 5.3.1.9)                                | 31.7 | 122 | 22 | 17 | 48 | 36 |   |
| A6NG51_HUMAN | SPTAN1       | A6NG51 | Spectrin alpha chain, non-erythrocytic 1                                  | 16.1 | 122 | 57 | 10 | 48 | 8  | Y |
| DHX9_HUMAN   | DHX9         | Q08211 | ATP-dependent RNA helicase A (RHA) (EC 3.6.4.13) (DEAH box<br>protein 9)  | 22.9 | 121 | 33 | 5  | 27 | 59 | Y |
| VPS35_HUMAN  | VPS35        | Q96QK1 | Vacuolar protein sorting-associated protein 35 (hVPS35) (Maternal-embr    | 31.3 | 121 | 26 | 25 | 30 | 42 | Y |

|              |              |        |                                                                        |      |     |    |    |    |    |   |
|--------------|--------------|--------|------------------------------------------------------------------------|------|-----|----|----|----|----|---|
| RUVB2_HUMAN  | RUVBL2       | Q9Y230 | RuvB-like 2 (EC 3.6.4.12) (48 kDa TATA box-binding protein-interacting | 37.4 | 121 | 38 | 2  | 45 | 37 | Y |
| E1NZA1_HUMAN | PRIC295      | E1NZA1 | Peroxisome proliferator activated receptor interacting complex protein | 16.5 | 119 | 25 | 4  | 27 | 65 |   |
| CTNA1_HUMAN  | CTNNA1       | P35221 | Catenin alpha-1 (Alpha E-catenin) (Cadherin-associated protein) (Renal | 27.2 | 119 | 36 | 29 | 14 | 42 | Y |
| B2RCM2_HUMAN | B2RCM2_HUMAN | B2RCM2 | cDNA, FLJ96156, highly similar to Homo sapiens leucyl-tRNA synthetase  | 24.1 | 117 | 27 | 6  | 14 | 71 |   |
| C9J9K3_HUMAN | RPSA         | C9J9K3 | 40S ribosomal protein SA (Fragment)                                    | 45.5 | 117 | 24 | 18 | 32 | 44 | Y |
| GRP75_HUMAN  | HSPA9        | P38646 | Stress-70 protein, mitochondrial (75 kDa glucose-regulated protein) (G | 30.6 | 117 | 42 | 16 | 22 | 40 | Y |
| B2R5U1_HUMAN | B2R5U1_HUMAN | B2R5U1 | cDNA, FLJ92620, highly similar to Homo sapiens staphylococcal nuclease | 22.7 | 116 | 37 | 2  | 47 | 32 |   |
| PYGL_HUMAN   | PYGL         | P06737 | Glycogen phosphorylase, liver form (EC 2.4.1.1)                        | 36.2 | 115 | 25 | 13 | 26 | 58 | Y |
| EHD4_HUMAN   | EHD4         | Q9H223 | EH domain-containing protein 4 (Hepatocellular carcinoma-associated pr | 42.9 | 115 | 37 | 17 | 8  | 53 | Y |
| CYFP1_HUMAN  | CYFIP1       | Q7L576 | Cytoplasmic FMR1-interacting protein 1 (Specifically Rac1-associated p | 20.1 | 115 | 34 | 25 | 23 | 36 | Y |
| H0Y4R1_HUMAN | IMPDH2       | H0Y4R1 | Inosine-5'-monophosphate dehydrogenase 2 (Fragment)                    | 31.1 | 113 | 33 | 12 | 20 | 48 | Y |
| B4DJ30_HUMAN | B4DJ30_HUMAN | B4DJ30 | cDNA FLJ61290, highly similar to Neutral alpha-glucosidase AB          | 21.9 | 113 | 41 | 19 | 30 | 28 |   |
| B4DMC0_HUMAN | B4DMC0_HUMAN | B4DMC0 | cDNA FLJ55341, highly similar to 116 kDa U5 small nuclear ribonucleopr | 22.1 | 112 | 15 | 10 | 37 | 50 |   |
| BGH3_HUMAN   | TGFB1        | Q15582 | Transforming growth factor-beta-induced protein ig-h3 (Beta ig-h3) (Ke | 23.7 | 112 | 27 | 20 | 28 | 41 | Y |
| COPB_HUMAN   | COPB1        | P53618 | Coatomer subunit beta (Beta-coat protein) (Beta-COP)                   | 25   | 112 | 32 | 12 | 34 | 38 | Y |
| A8K8U1_HUMAN | A8K8U1_HUMAN | A8K8U1 | cDNA FLJ77762, highly similar to Homo sapiens cullin-associated and ne | 17.4 | 112 | 39 | 27 | 36 | 11 |   |
| B0QY89_HUMAN | EIF3L        | B0QY89 | Eukaryotic translation initiation factor 3 subunit L (eIF3L) (Eukaryot | 24.4 | 111 | 30 | 14 | 32 | 36 | Y |
| E9PDF6_HUMAN | MYO1B        | E9PDF6 | Unconventional myosin-Ib                                               | 19.2 | 111 | 39 | 32 | 21 | 19 | Y |
| QSOX1_HUMAN  | QSOX1        | O00391 | Sulfhydryl oxidase 1 (hQSOX) (EC 1.8.3.2) (Quiescin Q6)                | 26.5 | 110 | 59 | 25 | 18 | 7  | Y |
| LMNA_HUMAN   | LMNA         | P02545 | Prelamin-A/C [Cleaved into: Lamin-A/C (70 kDa lamin) (Renal carcinoma  | 29.4 | 107 | 37 | 34 | 23 | 14 | Y |
| CLUS_HUMAN   | CLU          | P10909 | Clusterin (Aging-associated gene 4 protein) (Apolipoprotein J) (Apo-J) | 36.7 | 107 | 20 | 11 | 66 | 10 | Y |
| RUVB1_HUMAN  | RUVBL1       | Q9Y265 | RuvB-like 1 (EC 3.6.4.12) (49 kDa TATA box-binding protein-interacting | 34   | 106 | 24 | 13 | 35 | 34 | Y |
| B3KTQ2_HUMAN | B3KTQ2_HUMAN | B3KTQ2 | cDNA FLJ38589 fis, clone HCHON2010074, highly similar to LACTADHERIN   | 36.1 | 105 | 17 | 57 | 12 | 19 |   |
| SPTB2_HUMAN  | SPTBN1       | Q01082 | Spectrin beta chain, non-erythrocytic 1 (Beta-II spectrin) (Fodrin bet | 16.9 | 105 | 48 | 4  | 47 | 8  | Y |
| CATD_HUMAN   | CTSD         | P07339 | Cathepsin D (EC 3.4.23.5) [Cleaved into: Cathepsin D light chain; Cath | 38.3 | 105 | 60 | 21 | 23 | 2  | Y |
| RL4_HUMAN    | RPL4         | P36578 | 60S ribosomal protein L4 (60S ribosomal protein L1)                    | 34.4 | 104 | 48 | 12 | 3  | 43 | Y |
| PRS7_HUMAN   | PSMC2        | P35998 | 26S protease regulatory subunit 7 (26S proteasome AAA-ATPase subunit R | 45.5 | 104 | 33 | 3  | 33 | 38 | Y |

|              |              |        |                                                                          |      |     |    |    |    |    |   |
|--------------|--------------|--------|--------------------------------------------------------------------------|------|-----|----|----|----|----|---|
| B3KX11_HUMAN | B3KX11_HUMAN | B3KX11 | cDNA FLJ44436 fis, clone UTERU2019706, highly similar to T-complex pro   | 29.7 | 104 | 29 | 11 | 34 | 31 |   |
| K6PL_HUMAN   | PFKL         | P17858 | 6-phosphofructokinase, liver type (EC 2.7.1.11) (Phosphofructo-1-kinas   | 22.4 | 103 | 45 | 10 | 18 | 30 | Y |
| Q53HU0_HUMAN | Q53HU0_HUMAN | Q53HU0 | Chaperonin containing TCP1, subunit 8 (Theta) variant (Fragment)         | 42.9 | 103 | 32 | 10 | 40 | 23 |   |
| ACSL4_HUMAN  | ACSL4        | O60488 | Long-chain-fatty-acid--CoA ligase 4 (EC 6.2.1.3) (Long-chain acyl-CoA    | 27.4 | 102 | 46 | 26 | 3  | 27 | Y |
| PRDX1_HUMAN  | PRDX1        | Q06830 | Peroxisiredoxin-1 (EC 1.11.1.15) (Natural killer cell-enhancing factor A | 48.7 | 102 | 44 | 15 | 28 | 16 | Y |
| HEMO_HUMAN   | HPX          | P02790 | Hemopexin (Beta-1B-glycoprotein)                                         | 29   | 102 | 22 | 8  | 64 | 9  | Y |
| A8K2T7_HUMAN | A8K2T7_HUMAN | A8K2T7 | cDNA FLJ76780, highly similar to Homo sapiens epidermal growth factor    | 14.6 | 101 | 41 | 22 | 2  | 42 |   |
| ITA6_HUMAN   | ITGA6        | P23229 | Integrin alpha-6 (CD49 antigen-like family member F) (VLA-6) (CD antig   | 18.4 | 101 | 33 | 26 | 11 | 33 | Y |
| GNAI3_HUMAN  | GNAI3        | P08754 | Guanine nucleotide-binding protein G(k) subunit alpha (G(i) alpha-3)     | 29.7 | 100 | 28 | 20 | 11 | 41 | Y |
| RS3_HUMAN    | RPS3         | P23396 | 40S ribosomal protein S3                                                 | 58   | 100 | 31 | 15 | 22 | 35 | Y |
| GNAS1_HUMAN  | GNAS         | Q5JWF2 | Guanine nucleotide-binding protein G(s) subunit alpha isoforms XLas (A   | 11.7 | 99  | 39 | 19 | 10 | 35 | Y |
| RAP1B_HUMAN  | RAP1B        | P61224 | Ras-related protein Rap-1b (GTP-binding protein smg p21B)                | 49.5 | 99  | 37 | 18 | 13 | 32 | Y |
| A8K916_HUMAN | A8K916_HUMAN | A8K916 | cDNA FLJ78481, highly similar to Homo sapiens adaptor-related protein    | 18   | 99  | 32 | 9  | 35 | 29 |   |
| CLIC1_HUMAN  | CLIC1        | O00299 | Chloride intracellular channel protein 1 (Chloride channel ABP) (Nucle   | 41.5 | 98  | 39 | 15 | 10 | 35 | Y |
| ALDOA_HUMAN  | ALDOA        | P04075 | Fructose-bisphosphate aldolase A (EC 4.1.2.13) (Lung cancer antigen NY   | 40.9 | 98  | 48 | 15 | 22 | 19 | Y |
| B3GQS7_HUMAN | HSPD1        | B3GQS7 | Mitochondrial heat shock 60kD protein 1 variant 1                        | 25.3 | 98  | 30 | 20 | 31 | 18 | Y |
| B3KX72_HUMAN | B3KX72_HUMAN | B3KX72 | cDNA FLJ44920 fis, clone BRAMY3011501, highly similar to Heterogeneous   | 22   | 97  | 24 | 9  | 12 | 54 |   |
| E7EPC6_HUMAN | CD44         | E7EPC6 | CD44 antigen                                                             | 12.6 | 97  | 23 | 19 | 13 | 41 | Y |
| SYRC_HUMAN   | RARS         | P54136 | Arginine--tRNA ligase, cytoplasmic (EC 6.1.1.19) (Arginyl-tRNA synthet   | 28.6 | 97  | 31 | 8  | 22 | 37 | Y |
| SYDC_HUMAN   | DARS         | P14868 | Aspartate--tRNA ligase, cytoplasmic (EC 6.1.1.12) (Aspartyl-tRNA synth   | 41.1 | 96  | 28 | 6  | 22 | 41 | Y |
| TCPA_HUMAN   | TCP1         | P17987 | T-complex protein 1 subunit alpha (TCP-1-alpha) (CCT-alpha)              | 27.7 | 96  | 23 | 12 | 35 | 29 | Y |
| SYG_HUMAN    | GARS         | P41250 | Glycine--tRNA ligase (EC 6.1.1.14) (Diadenosine tetraphosphate synthet   | 26   | 95  | 21 | 4  | 22 | 48 | Y |
| PLAK_HUMAN   | JUP          | P14923 | Junction plakoglobin (Catenin gamma) (Desmoplakin III) (Desmoplakin-3)   | 33.7 | 95  | 49 | 19 | 19 | 13 | Y |
| ENPL_HUMAN   | HSP90B1      | P14625 | Endoplasmic (94 kDa glucose-regulated protein) (GRP-94) (Heat shock pr   | 25   | 95  | 44 | 26 | 20 | 9  | Y |
| B2R8R5_HUMAN | B2R8R5_HUMAN | B2R8R5 | cDNA, FLJ94025, highly similar to Homo sapiens tripartite motif-contai   | 20.4 | 94  | 2  | 3  | 39 | 50 |   |
| AP2A1_HUMAN  | AP2A1        | O95782 | AP-2 complex subunit alpha-1 (100 kDa coated vesicle protein A) (Adapt   | 17.7 | 94  | 20 | 11 | 26 | 37 | Y |
| UGDH_HUMAN   | UGDH         | O60701 | UDP-glucose 6-dehydrogenase (UDP-Glc dehydrogenase) (UDP-GlcDH) (UDPGD   | 38.7 | 94  | 8  | 1  | 54 | 32 | Y |



|              |              |        |                                                                         |      |    |    |    |    |    |   |
|--------------|--------------|--------|-------------------------------------------------------------------------|------|----|----|----|----|----|---|
| H0Y8C6_HUMAN | IPO5         | H0Y8C6 | Importin-5 (Fragment)                                                   | 15.3 | 94 | 31 | 13 | 23 | 29 | Y |
| NIBL1_HUMAN  | FAM129B      | Q96TA1 | Niban-like protein 1 (Meg-3) (Melanoma invasion by ERK) (MINERVA) (Pro) | 21.8 | 94 | 36 | 16 | 14 | 28 | Y |
| SYEP_HUMAN   | EPRS         | P07814 | Bifunctional glutamate/proline--tRNA ligase (Bifunctional aminoacyl-tR  | 20.6 | 93 | 31 | 1  | 12 | 52 | Y |
| XRCC5_HUMAN  | XRCC5        | P13010 | X-ray repair cross-complementing protein 5 (EC 3.6.4.-) (86 kDa subuni  | 24.3 | 93 | 19 | 1  | 46 | 29 | Y |
| B4DLV7_HUMAN | B4DLV7_HUMAN | B4DLV7 | cDNA FLJ60299, highly similar to Rab GDP dissociation inhibitor beta    | 38.3 | 91 | 32 | 22 | 8  | 30 |   |
| NQO1_HUMAN   | NQO1         | P15559 | NAD(P)H dehydrogenase [quinone] 1 (EC 1.6.5.2) (Azoreductase) (DT-diap  | 38.3 | 91 | 5  | 3  | 60 | 24 | Y |
| Q96MH4_HUMAN | Q96MH4_HUMAN | Q96MH4 | cDNA FLJ32377 fis, clone SKMUS1000014, highly similar to Polyubiquitin  | 15.2 | 91 | 20 | 23 | 28 | 20 |   |
| TGM2_HUMAN   | TGM2         | P21980 | Protein-glutamine gamma-glutamyltransferase 2 (EC 2.3.2.13) (Tissue tr  | 27.2 | 91 | 64 | 3  | 17 | 11 | Y |
| PSMD1_HUMAN  | PSMD1        | Q99460 | 26S proteasome non-ATPase regulatory subunit 1 (26S proteasome regulat  | 19.1 | 90 | 23 | 1  | 43 | 27 | Y |
| PAI1_HUMAN   | SERPINE1     | P05121 | Plasminogen activator inhibitor 1 (PAI) (PAI-1) (Endothelial plasminog  | 38.6 | 90 | 43 | 4  | 23 | 25 | Y |
| GFPT1_HUMAN  | GFPT1        | Q06210 | Glutamine--fructose-6-phosphate aminotransferase [isomerizing] 1 (EC 2  | 24.7 | 90 | 35 | 10 | 23 | 22 | Y |
| C9JZR2_HUMAN | CTNND1       | C9JZR2 | Catenin delta-1                                                         | 20.1 | 88 | 30 | 21 | 8  | 29 | Y |
| Q3B7A7_HUMAN | GART         | Q3B7A7 | Phosphoribosylglycinamide formyltransferase, phosphoribosylglycinamide  | 19.8 | 88 | 31 | 1  | 30 | 27 | Y |
| TRFM_HUMAN   | MFI2         | P08582 | Melanotransferrin (Melanoma-associated antigen p97) (CD antigen CD228)  | 19.4 | 87 | 23 | 19 | 1  | 46 | Y |
| PPIB_HUMAN   | PPIB         | P23284 | Peptidyl-prolyl cis-trans isomerase B (PPIase B) (EC 5.2.1.8) (CYP-S1)  | 41.7 | 87 | 15 | 33 | 28 | 10 | Y |
| UBR4_HUMAN   | UBR4         | Q5T4S7 | E3 ubiquitin-protein ligase UBR4 (EC 6.3.2.-) (600 kDa retinoblastoma   | 4.82 | 85 | 25 | 2  | 34 | 28 | Y |
| NUCL_HUMAN   | NCL          | P19338 | Nucleolin (Protein C23)                                                 | 15.6 | 85 | 26 | 27 | 18 | 14 | Y |
| VAT1_HUMAN   | VAT1         | Q99536 | Synaptic vesicle membrane protein VAT-1 homolog (EC 1.-.-.-)            | 27.7 | 85 | 33 | 28 | 11 | 14 | Y |
| Q53HV1_HUMAN | Q53HV1_HUMAN | Q53HV1 | Ribosomal protein S4, X-linked X isoform variant (Fragment)             | 51.7 | 84 | 36 | 6  | 6  | 38 |   |
| AAAT_HUMAN   | SLC1A5       | Q15758 | Neutral amino acid transporter B(0) (ATB(0)) (Baboon M7 virus receptor  | 16.1 | 84 | 24 | 9  | 18 | 33 | Y |
| Q59GB4_HUMAN | Q59GB4_HUMAN | Q59GB4 | Dihydropyrimidinase-like 2 variant (Fragment)                           | 25.5 | 84 | 22 | 13 | 23 | 24 |   |
| Q53EM5_HUMAN | Q53EM5_HUMAN | Q53EM5 | Transketolase variant (Fragment)                                        | 29.7 | 84 | 10 | 13 | 56 | 8  |   |
| B2R5B3_HUMAN | B2R5B3_HUMAN | B2R5B3 | Histone H2A                                                             | 40.8 | 83 | 17 | 11 | 14 | 42 |   |
| B2R5M8_HUMAN | B2R5M8_HUMAN | B2R5M8 | Isocitrate dehydrogenase [NADP] (EC 1.1.1.42)                           | 34.1 | 83 | 27 | 10 | 39 | 8  |   |
| SYNC_HUMAN   | NARS         | O43776 | Asparagine--tRNA ligase, cytoplasmic (EC 6.1.1.22) (Asparaginyl-tRNA s  | 26.5 | 82 | 14 | 8  | 9  | 50 | Y |
| GNAI1_HUMAN  | GNAI1        | P63096 | Guanine nucleotide-binding protein G(i) subunit alpha-1 (Adenylate cyc  | 29.7 | 82 | 24 | 16 | 7  | 36 | Y |

|              |              |        |                                                                        |      |    |    |    |    |    |   |
|--------------|--------------|--------|------------------------------------------------------------------------|------|----|----|----|----|----|---|
| Q6NXR8_HUMAN | RPS3A        | Q6NXR8 | 40S ribosomal protein S3a                                              | 57.6 | 82 | 30 | 10 | 7  | 36 | Y |
| GBLP_HUMAN   | GNB2L1       | P63244 | Guanine nucleotide-binding protein subunit beta-2-like 1 (Cell prolif  | 44.2 | 80 | 25 | 8  | 18 | 32 | Y |
| B4DR87_HUMAN | PLOD1        | B4DR87 | Procollagen-lysine,2-oxoglutarate 5-dioxygenase 1 (cDNA FLJ59393, high | 23.5 | 80 | 33 | 10 | 8  | 30 | Y |
| NCKP1_HUMAN  | NCKAP1       | Q9Y2A7 | Nck-associated protein 1 (NAP 1) (Membrane-associated protein HEM-2) ( | 16.7 | 80 | 31 | 19 | 10 | 22 | Y |
| RAB7A_HUMAN  | RAB7A        | P51149 | Ras-related protein Rab-7a                                             | 55.1 | 80 | 26 | 23 | 13 | 18 | Y |
| RRAS_HUMAN   | RRAS         | P10301 | Ras-related protein R-Ras (p23)                                        | 35.3 | 79 | 18 | 21 | 10 | 32 | Y |
| Q5JR95_HUMAN | RPS8         | Q5JR95 | 40S ribosomal protein S8                                               | 49.5 | 79 | 30 | 11 | 7  | 32 | Y |
| IPO7_HUMAN   | IPO7         | O95373 | Importin-7 (Imp7) (Ran-binding protein 7) (RanBP7)                     | 13.8 | 79 | 26 | 14 | 25 | 16 | Y |
| A8K492_HUMAN | A8K492_HUMAN | A8K492 | cDNA FLJ76789, highly similar to Homo sapiens methionine-tRNA syntheta | 14.3 | 78 | 25 | 5  | 21 | 29 |   |
| B7Z6Z4_HUMAN | MYL6         | B7Z6Z4 | Myosin light polypeptide 6 (cDNA FLJ56329, highly similar to Myosin li | 32.4 | 78 | 33 | 13 | 10 | 21 | Y |
| PRS10_HUMAN  | PSMC6        | P62333 | 26S protease regulatory subunit 10B (26S proteasome AAA-ATPase subunit | 32.9 | 77 | 18 | 8  | 21 | 34 | Y |
| CO6A1_HUMAN  | COL6A1       | P12109 | Collagen alpha-1(VI) chain                                             | 13.5 | 77 | 40 | 12 | 2  | 23 | Y |
| B2R9K8_HUMAN | B2R9K8_HUMAN | B2R9K8 | cDNA, FLJ94440, highly similar to Homo sapiens chaperonin containing T | 26   | 77 | 15 | 6  | 37 | 20 |   |
| E41L2_HUMAN  | EPB41L2      | O43491 | Band 4.1-like protein 2 (Generally expressed protein 4.1) (4.1G)       | 19   | 76 | 36 | 4  | 1  | 37 | Y |
| LPPRC_HUMAN  | LRPPRC       | P42704 | Leucine-rich PPR motif-containing protein, mitochondrial (130 kDa leuc | 19.9 | 76 | 19 | 2  | 26 | 30 | Y |
| RAB8A_HUMAN  | RAB8A        | P61006 | Ras-related protein Rab-8A (Oncogene c-mel)                            | 35.3 | 75 | 24 | 15 | 9  | 29 | Y |
| B4DUQ1_HUMAN | B4DUQ1_HUMAN | B4DUQ1 | cDNA FLJ54552, highly similar to Heterogeneous nuclear ribonucleoprote | 28.5 | 75 | 17 | 11 | 23 | 25 |   |
| A8K9V7_HUMAN | A8K9V7_HUMAN | A8K9V7 | cDNA FLJ77207                                                          | 16.1 | 75 | 32 | 11 | 9  | 25 |   |
| B2R657_HUMAN | B2R657_HUMAN | B2R657 | Annexin                                                                | 22.5 | 75 | 20 | 15 | 20 | 23 |   |
| AP2A2_HUMAN  | AP2A2        | O94973 | AP-2 complex subunit alpha-2 (100 kDa coated vesicle protein C) (Adapt | 20.7 | 75 | 24 | 18 | 18 | 17 | Y |
| RAB1A_HUMAN  | RAB1A        | P62820 | Ras-related protein Rab-1A (YPT1-related protein)                      | 40.5 | 75 | 21 | 25 | 16 | 15 | Y |
| Q53HW2_HUMAN | Q53HW2_HUMAN | Q53HW2 | Ribosomal protein P0 variant (Fragment)                                | 27.1 | 74 | 17 | 12 | 20 | 25 |   |
| SERPH_HUMAN  | SERPINH1     | P50454 | Serpin H1 (47 kDa heat shock protein) (Arsenic-transactivated protein  | 31.1 | 74 | 30 | 33 | 2  | 7  | Y |
| B4DGU4_HUMAN | CTNNB1       | B4DGU4 | Catenin beta-1 (cDNA FLJ57878, highly similar to Beta-catenin)         | 21.3 | 73 | 5  | 31 | 6  | 31 | Y |
| B5MDF5_HUMAN | RAN          | B5MDF5 | GTP-binding nuclear protein Ran (RAN, member RAS oncogene family, isof | 30   | 73 | 21 | 7  | 20 | 26 | Y |
| RAB2A_HUMAN  | RAB2A        | P61019 | Ras-related protein Rab-2A                                             | 59   | 73 | 27 | 16 | 12 | 18 | Y |
| HSPB1_HUMAN  | HSPB1        | P04792 | Heat shock protein beta-1 (HspB1) (28 kDa heat shock protein) (Estroge | 52.7 | 73 | 22 | 14 | 23 | 17 | Y |

|              |              |        |                                                                        |      |    |    |    |    |    |   |
|--------------|--------------|--------|------------------------------------------------------------------------|------|----|----|----|----|----|---|
| 6PGD_HUMAN   | PGD          | P52209 | 6-phosphogluconate dehydrogenase, decarboxylating (EC 1.1.1.44)        | 29.4 | 73 | 10 | 9  | 44 | 11 | Y |
| A8K9A4_HUMAN | A8K9A4_HUMAN | A8K9A4 | cDNA FLJ75154, highly similar to Homo sapiens heterogeneous nuclear r  | 26.5 | 72 | 20 | 10 | 17 | 28 |   |
| GBB2_HUMAN   | GNB2         | P62879 | Guanine nucleotide-binding protein G(I)/G(S)/G(T) subunit beta-2 (G pr | 27.6 | 72 | 23 | 18 | 9  | 24 | Y |
| B3KSH1_HUMAN | EIF3F        | B3KSH1 | Eukaryotic translation initiation factor 3 subunit F (eIF3f) (Eukaryot | 25.8 | 72 | 23 | 7  | 22 | 20 | Y |
| TAGL2_HUMAN  | TAGLN2       | P37802 | Transgelin-2 (Epididymis tissue protein Li 7e) (SM22-alpha homolog)    | 51.3 | 72 | 30 | 8  | 17 | 17 | Y |
| COF1_HUMAN   | CFL1         | P23528 | Cofilin-1 (18 kDa phosphoprotein) (p18) (Cofilin, non-muscle isoform)  | 49.4 | 72 | 24 | 19 | 15 | 14 | Y |
| PP1A_HUMAN   | PPP1CA       | P62136 | Serine/threonine-protein phosphatase PP1-alpha catalytic subunit (PP-1 | 30   | 71 | 18 | 13 | 9  | 32 | Y |
| SAHH_HUMAN   | AHCY         | P23526 | Adenosylhomocysteinase (AdoHcyase) (EC 3.3.1.1) (S-adenosyl-L-homocyst | 30.6 | 71 | 18 | 5  | 25 | 24 | Y |
| B1ANR0_HUMAN | PABPC4       | B1ANR0 | Poly(A) binding protein, cytoplasmic 4 (Inducible form), isoform CRA_e | 17.2 | 71 | 26 | 8  | 15 | 23 | Y |
| Q9BU08_HUMAN | Q9BU08_HUMAN | Q9BU08 | Putative uncharacterized protein (Fragment)                            | 26.5 | 71 | 18 | 5  | 32 | 18 |   |
| PSB3_HUMAN   | PSMB3        | P49720 | Proteasome subunit beta type-3 (EC 3.4.25.1) (Proteasome chain 13) (Pr | 37.6 | 71 | 19 | 7  | 34 | 11 | Y |
| Q53HS0_HUMAN | Q53HS0_HUMAN | Q53HS0 | Glutaminyl-tRNA synthetase variant (Fragment)                          | 26.6 | 70 | 13 | 5  | 21 | 36 |   |
| RS16_HUMAN   | RPS16        | P62249 | 40S ribosomal protein S16                                              | 60.3 | 70 | 23 | 8  | 11 | 29 | Y |
| B4E1D5_HUMAN | EIF3C        | B4E1D5 | Eukaryotic translation initiation factor 3 subunit C (eIF3c) (Eukaryot | 11.3 | 70 | 25 | 12 | 14 | 21 | Y |
| DHX15_HUMAN  | DHX15        | O43143 | Putative pre-mRNA-splicing factor ATP-dependent RNA helicase DHX15 (EC | 21.9 | 69 | 12 | 2  | 15 | 41 | Y |
| GNA11_HUMAN  | GNA11        | P29992 | Guanine nucleotide-binding protein subunit alpha-11 (G alpha-11) (G-pr | 30.1 | 69 | 14 | 11 | 3  | 41 | Y |
| Q8TBK5_HUMAN | RPL6         | Q8TBK5 | 60S ribosomal protein L6                                               | 44.4 | 69 | 22 | 13 | 7  | 27 | Y |
| COPG1_HUMAN  | COPG1        | Q9Y678 | Coatomer subunit gamma-1 (Gamma-1-coat protein) (Gamma-1-COP)          | 19.3 | 69 | 24 | 9  | 21 | 15 | Y |
| PSA_HUMAN    | NPEPPS       | P55786 | Puromycin-sensitive aminopeptidase (PSA) (EC 3.4.11.14) (Cytosol alany | 23.7 | 69 | 27 | 11 | 26 | 7  | Y |
| Q53FT8_HUMAN | Q53FT8_HUMAN | Q53FT8 | Proteasome subunit beta type (EC 3.4.25.1) (Fragment)                  | 36.5 | 69 | 17 | 7  | 43 | 5  |   |
| ABCE1_HUMAN  | ABCE1        | P61221 | ATP-binding cassette sub-family E member 1 (2'-5'-oligoadenylate-bindi | 33.2 | 68 | 12 | 3  | 17 | 38 | Y |
| PP1B_HUMAN   | PPP1CB       | P62140 | Serine/threonine-protein phosphatase PP1-beta catalytic subunit (PP-1B | 25.1 | 68 | 18 | 11 | 10 | 31 | Y |
| RL7A_HUMAN   | RPL7A        | P62424 | 60S ribosomal protein L7a (PLA-X polypeptide) (Surfeit locus protein 3 | 25.6 | 68 | 24 | 5  | 11 | 29 | Y |
| C9IZE4_HUMAN | PSMD6        | C9IZE4 | 26S proteasome non-ATPase regulatory subunit 6 (Proteasome (Prosome, m | 36   | 68 | 18 | 6  | 17 | 28 | Y |
| CBR1_HUMAN   | CBR1         | P16152 | Carbonyl reductase [NADPH] 1 (EC 1.1.1.184) (15-hydroxyprostaglandin d | 47.3 | 68 | 22 | 6  | 19 | 22 | Y |
| AMPL_HUMAN   | LAP3         | P28838 | Cytosol aminopeptidase (EC 3.4.11.1) (Leucine aminopeptidase 3) (LAP-3 | 41.4 | 68 | 52 | 4  | 3  | 9  | Y |

|              |              |        |                                                                        |      |    |    |    |    |    |   |
|--------------|--------------|--------|------------------------------------------------------------------------|------|----|----|----|----|----|---|
| EHD2_HUMAN   | EHD2         | Q9NZN4 | EH domain-containing protein 2 (PAST homolog 2)                        | 30.9 | 67 | 11 | 20 | 8  | 31 | Y |
| H0YNE9_HUMAN | RAB8B        | H0YNE9 | Ras-related protein Rab-8B (Fragment)                                  | 38.8 | 67 | 23 | 17 | 4  | 25 | Y |
| Q53GX7_HUMAN | Q53GX7_HUMAN | Q53GX7 | Threonyl-tRNA synthetase variant (Fragment)                            | 18.1 | 67 | 26 | 7  | 22 | 13 |   |
| GNA13_HUMAN  | GNA13        | Q14344 | Guanine nucleotide-binding protein subunit alpha-13 (G alpha-13) (G-pr | 30.2 | 66 | 31 | 12 | 4  | 20 | Y |
| NAMPT_HUMAN  | NAMPT        | P43490 | Nicotinamide phosphoribosyltransferase (NAMPRtase) (Nampt) (EC 2.4.2.1 | 29.5 | 66 | 25 | 4  | 35 | 5  | Y |
| PRS4_HUMAN   | PSMC1        | P62191 | 26S protease regulatory subunit 4 (P26s4) (26S proteasome AAA-ATPases  | 22.3 | 65 | 19 | 1  | 18 | 29 | Y |
| RALA_HUMAN   | RALA         | P11233 | Ras-related protein Ral-A                                              | 26.2 | 65 | 18 | 17 | 3  | 28 | Y |
| B2RD27_HUMAN | B2RD27_HUMAN | B2RD27 | cDNA, FLJ96428, highly similar to Homo sapiens proteasome (prosome, ma | 24.1 | 65 | 23 | 3  | 17 | 21 |   |
| Q53HV2_HUMAN | Q53HV2_HUMAN | Q53HV2 | Chaperonin containing TCP1, subunit 7 (Eta) variant (Fragment)         | 29.3 | 65 | 17 | 6  | 29 | 19 |   |
| Q5T5C7_HUMAN | SARS         | Q5T5C7 | Serine--tRNA ligase, cytoplasmic                                       | 24.3 | 64 | 28 | 1  | 4  | 34 | Y |
| Q9Y6E3_HUMAN | Q9Y6E3_HUMAN | Q9Y6E3 | HSPC027                                                                | 33.2 | 64 | 21 | 2  | 21 | 23 |   |
| Q53HH4_HUMAN | Q53HH4_HUMAN | Q53HH4 | Ras-GTPase-activating protein SH3-domain-binding protein variant (Frag | 18.2 | 64 | 17 | 9  | 19 | 20 |   |
| AT2B4_HUMAN  | ATP2B4       | P23634 | Plasma membrane calcium-transporting ATPase 4 (PMCA4) (EC 3.6.3.8) (Ma | 11   | 64 | 17 | 23 | 4  | 20 | Y |
| D3DPU2_HUMAN | CAP1         | D3DPU2 | Adenylyl cyclase-associated protein                                    | 33.3 | 64 | 24 | 12 | 14 | 18 | Y |
| TPIS_HUMAN   | TPI1         | P60174 | Triosephosphate isomerase (TIM) (EC 5.3.1.1) (Triose-phosphate isomera | 49.3 | 64 | 30 | 6  | 12 | 18 | Y |
| Q6FIG4_HUMAN | RAB1B        | Q6FIG4 | RAB1B protein                                                          | 40.3 | 64 | 17 | 21 | 10 | 16 | Y |
| EFTU_HUMAN   | TUFM         | P49411 | Elongation factor Tu, mitochondrial (EF-Tu) (P43)                      | 33.8 | 63 | 15 | 2  | 13 | 37 | Y |
| RAB10_HUMAN  | RAB10        | P61026 | Ras-related protein Rab-10                                             | 49.5 | 63 | 17 | 17 | 8  | 21 | Y |
| B4DE59_HUMAN | B4DE59_HUMAN | B4DE59 | cDNA FLJ60424, highly similar to Junction plakoglobin                  | 29.7 | 63 | 20 | 26 | 13 | 7  |   |
| ILF2_HUMAN   | ILF2         | Q12905 | Interleukin enhancer-binding factor 2 (Nuclear factor of activated T-c | 23.1 | 62 | 13 | 4  | 20 | 29 | Y |
| 2AAA_HUMAN   | PPP2R1A      | P30153 | Serine/threonine-protein phosphatase 2A 65 kDa regulatory subunit A al | 22.6 | 62 | 17 | 7  | 19 | 20 | Y |
| Q59ER5_HUMAN | Q59ER5_HUMAN | Q59ER5 | WD repeat-containing protein 1 isoform 1 variant (Fragment)            | 13.5 | 62 | 24 | 10 | 13 | 15 |   |
| G3V5Z7_HUMAN | PSMA6        | G3V5Z7 | Proteasome subunit alpha type (EC 3.4.25.1)                            | 42.5 | 62 | 15 | 11 | 36 | 1  | Y |
| RS2_HUMAN    | RPS2         | P15880 | 40S ribosomal protein S2 (40S ribosomal protein S4) (Protein LLRep3)   | 39.9 | 61 | 20 | 6  | 6  | 34 | Y |
| SERA_HUMAN   | PHGDH        | O43175 | D-3-phosphoglycerate dehydrogenase (3-PGDH) (EC 1.1.1.95)              | 23.3 | 61 | 22 | 2  | 8  | 31 | Y |
| B4DY23_HUMAN | B4DY23_HUMAN | B4DY23 | cDNA FLJ61188, highly similar to Basigin                               | 35.1 | 61 | 24 | 17 | 3  | 17 |   |

|              |              |        |                                                                        |      |    |    |    |    |    |   |
|--------------|--------------|--------|------------------------------------------------------------------------|------|----|----|----|----|----|---|
| B3KU62_HUMAN | B3KU62_HUMAN | B3KU62 | cDNA FLJ39243 fis, clone OCBBF2008283, highly similar to Protein NDRG1 | 22.2 | 61 | 41 | 6  | 1  | 13 |   |
| A5YM53_HUMAN | ITGAV        | A5YM53 | ITGAV protein                                                          | 13.8 | 60 | 11 | 10 | 12 | 27 | Y |
| B3KTA3_HUMAN | B3KTA3_HUMAN | B3KTA3 | Fascin                                                                 | 25.6 | 60 | 17 | 6  | 11 | 27 |   |
| A4D210_HUMAN | EIF3B        | A4D210 | Eukaryotic translation initiation factor 3 subunit B (eIF3b) (Eukaryot | 16.3 | 60 | 17 | 6  | 17 | 21 | Y |
| LEG1_HUMAN   | LGALS1       | P09382 | Galectin-1 (Gal-1) (14 kDa laminin-binding protein) (HLBP14) (14 kDa l | 54.1 | 60 | 21 | 12 | 7  | 21 | Y |
| E9PCY7_HUMAN | HNRNP1       | E9PCY7 | Heterogeneous nuclear ribonucleoprotein H                              | 19.8 | 60 | 16 | 10 | 16 | 19 | Y |
| I433Z_HUMAN  | YWHAZ        | P63104 | 14-3-3 protein zeta/delta (Protein kinase C inhibitor protein 1) (KCIP | 46.5 | 60 | 25 | 15 | 9  | 13 | Y |
| Q59GL1_HUMAN | Q59GL1_HUMAN | Q59GL1 | Synaptotagmin binding, cytoplasmic RNA interacting protein variant (Fr | 26   | 59 | 14 | 3  | 12 | 32 |   |
| B4E1G2_HUMAN | B4E1G2_HUMAN | B4E1G2 | Serine hydroxymethyltransferase (EC 2.1.2.1)                           | 31.4 | 59 | 13 | 3  | 13 | 30 |   |
| RL7_HUMAN    | RPL7         | P18124 | 60S ribosomal protein L7                                               | 34.3 | 59 | 21 | 10 | 4  | 27 | Y |
| B2RDW0_HUMAN | B2RDW0_HUMAN | B2RDW0 | cDNA, FLJ96792, highly similar to Homo sapiens calmodulin 2 (phosphory | 40.9 | 59 | 11 | 14 | 11 | 24 |   |
| IF2G_HUMAN   | EIF2S3       | P41091 | Eukaryotic translation initiation factor 2 subunit 3 (Eukaryotic trans | 30.7 | 59 | 32 | 1  | 12 | 16 | Y |
| ACADV_HUMAN  | ACADVL       | P49748 | Very long-chain specific acyl-CoA dehydrogenase, mitochondrial (VLCAD) | 30.5 | 58 | 8  | 8  | 10 | 35 | Y |
| A8K4T6_HUMAN | A8K4T6_HUMAN | A8K4T6 | cDNA FLJ76282, highly similar to Homo sapiens proteasome (prosome, mac | 19.2 | 58 | 16 | 4  | 16 | 23 |   |
| ACTZ_HUMAN   | ACTR1A       | P61163 | Alpha-centractin (Centractin) (ARP1) (Actin-RPV) (Centrosome-associate | 16.8 | 58 | 15 | 10 | 19 | 15 | Y |
| PUR6_HUMAN   | PAICS        | P22234 | Multifunctional protein ADE2 [Includes: Phosphoribosylaminoimidazole-s | 28.2 | 58 | 27 | 3  | 17 | 14 | Y |
| B2R7W4_HUMAN | B2R7W4_HUMAN | B2R7W4 | cDNA, FLJ93632, highly similar to Homo sapiens heterogeneous nuclear r | 24.5 | 57 | 16 | 2  | 8  | 34 |   |
| A4D2P0_HUMAN | RAC1         | A4D2P0 | Ras-related C3 botulinum toxin substrate 1 (Rho family, small GTP bind | 35.5 | 57 | 21 | 13 | 3  | 20 | Y |
| D3DRX6_HUMAN | KIF5B        | D3DRX6 | Kinesin family member 5B, isoform CRA_a                                | 21.5 | 57 | 8  | 5  | 25 | 19 | Y |
| RAB14_HUMAN  | RAB14        | P61106 | Ras-related protein Rab-14                                             | 38.6 | 57 | 18 | 13 | 10 | 17 | Y |
| RL10A_HUMAN  | RPL10A       | P62906 | 60S ribosomal protein L10a (CSA-19) (Neural precursor cell expressed d | 33.2 | 56 | 16 | 2  | 16 | 27 | Y |
| Q6ZS74_HUMAN | RALB         | Q6ZS74 | Ras-related protein Ral-B (V-ral simian leukemia viral oncogene homolo | 24.2 | 56 | 17 | 15 | 3  | 22 | Y |
| AT2B1_HUMAN  | ATP2B1       | P20020 | Plasma membrane calcium-transporting ATPase 1 (PMCA1) (EC 3.6.3.8) (P  | 11.4 | 56 | 22 | 13 | 4  | 17 | Y |
| CD166_HUMAN  | ALCAM        | Q13740 | CD166 antigen (Activated leukocyte cell adhesion molecule) (CD antigen | 13.9 | 55 | 17 | 13 | 4  | 21 | Y |
| I433B_HUMAN  | YWHAZ        | P31946 | 14-3-3 protein beta/alpha (Protein 1054) (Protein kinase C inhibitor p | 38.2 | 55 | 23 | 11 | 3  | 19 | Y |
| MDHM_HUMAN   | MDH2         | P40926 | Malate dehydrogenase, mitochondrial (EC 1.1.1.37)                      | 39.1 | 55 | 21 | 5  | 13 | 17 | Y |

|              |              |        |                                                                        |      |    |    |    |    |    |   |
|--------------|--------------|--------|------------------------------------------------------------------------|------|----|----|----|----|----|---|
| RAB5C_HUMAN  | RAB5C        | P51148 | Ras-related protein Rab-5C (L1880) (RAB5L)                             | 38.9 | 55 | 25 | 17 | 5  | 11 | Y |
| PRDX6_HUMAN  | PRDX6        | P30041 | Peroxiredoxin-6 (EC 1.11.1.15) (1-Cys peroxiredoxin) (1-Cys PRX) (24 k | 46.4 | 55 | 36 | 12 | 6  | 8  | Y |
| B3KY95_HUMAN | B3KY95_HUMAN | B3KY95 | cDNA FLJ16143 fis, clone BRAMY2038516, highly similar to Protein disul | 23.4 | 55 | 27 | 15 | 8  | 4  |   |
| B7Z5Z2_HUMAN | RRAS2        | B7Z5Z2 | Ras-related protein R-Ras2 (cDNA FLJ61162, highly similar to Ras-relat | 41.4 | 54 | 18 | 20 | 2  | 16 | Y |
| ITA2_HUMAN   | ITGA2        | P17301 | Integrin alpha-2 (CD49 antigen-like family member B) (Collagen recepto | 14.4 | 53 | 19 | 9  | 2  | 24 | Y |
| IF4A3_HUMAN  | EIF4A3       | P38919 | Eukaryotic initiation factor 4A-III (eIF-4A-III) (eIF4A-III) (EC 3.6.4 | 28.5 | 53 | 9  | 4  | 16 | 23 | Y |
| HNRPF_HUMAN  | HNRNPF       | P52597 | Heterogeneous nuclear ribonucleoprotein F (hnRNP F) (Nucleolin-like pr | 24.6 | 53 | 14 | 11 | 12 | 18 | Y |
| B7Z9C2_HUMAN | NAP1L1       | B7Z9C2 | Nucleosome assembly protein 1-like 1 (cDNA FLJ58569, highly similar to | 18.3 | 53 | 16 | 14 | 10 | 13 | Y |
| PGAM1_HUMAN  | PGAM1        | P18669 | Phosphoglycerate mutase 1 (EC 3.1.3.13) (EC 5.4.2.11) (EC 5.4.2.4) (BP | 25.2 | 52 | 18 | 5  | 10 | 19 | Y |
| CTLI_HUMAN   | SLC44A1      | Q8WWI5 | Choline transporter-like protein 1 (CDw92) (Solute carrier family 44 m | 12.6 | 52 | 13 | 10 | 11 | 18 | Y |
| Q32Q12_HUMAN | NME1-NME2    | Q32Q12 | Nucleoside diphosphate kinase (EC 2.7.4.6)                             | 31.5 | 52 | 20 | 11 | 13 | 11 | Y |
| PARP4_HUMAN  | PARP4        | Q9UKK3 | Poly [ADP-ribose] polymerase 4 (PARP-4) (EC 2.4.2.30) (193 kDa vault p | 11.4 | 52 | 6  | 4  | 40 | 1  | Y |
| DDX17_HUMAN  | DDX17        | Q92841 | Probable ATP-dependent RNA helicase DDX17 (EC 3.6.4.13) (DEAD box prot | 16.9 | 51 | 12 | 2  | 15 | 22 | Y |
| CN37_HUMAN   | CNP          | P09543 | 2',3'-cyclic-nucleotide 3'-phosphodiesterase (CNP) (CNPase) (EC 3.1.4. | 22.8 | 51 | 28 | 7  | 1  | 15 | Y |
| Q9BTQ7_HUMAN | Q9BTQ7_HUMAN | Q9BTQ7 | Similar to ribosomal protein L23 (Fragment)                            | 34.3 | 51 | 18 | 14 | 6  | 14 |   |
| UBP5_HUMAN   | USP5         | P45974 | Ubiquitin carboxyl-terminal hydrolase 5 (EC 3.4.19.12) (Deubiquitinati | 12.2 | 51 | 18 | 6  | 19 | 8  | Y |
| MCM5_HUMAN   | MCM5         | P33992 | DNA replication licensing factor MCM5 (EC 3.6.4.12) (CDC46 homolog) (P | 26.3 | 50 | 4  | 5  | 6  | 35 | Y |
| CD82_HUMAN   | CD82         | P27701 | CD82 antigen (C33 antigen) (IA4) (Inducible membrane protein R2) (Meta | 16.9 | 50 | 15 | 11 | 3  | 22 | Y |
| A8K666_HUMAN | A8K666_HUMAN | A8K666 | cDNA FLJ75460, highly similar to Homo sapiens phenylalanine-tRNA synth | 20.2 | 50 | 10 | 4  | 15 | 21 |   |
| DHE3_HUMAN   | GLUD1        | P00367 | Glutamate dehydrogenase 1, mitochondrial (GDH 1) (EC 1.4.1.3)          | 18.1 | 50 | 3  | 1  | 29 | 18 | Y |
| RB11B_HUMAN  | RAB11B       | Q15907 | Ras-related protein Rab-11B (GTP-binding protein YPT3)                 | 44.5 | 50 | 13 | 16 | 5  | 18 | Y |
| DX39B_HUMAN  | DDX39B       | Q13838 | Spliceosome RNA helicase DDX39B (EC 3.6.4.13) (56 kDa U2AF65-associate | 22.7 | 50 | 22 | 4  | 11 | 14 | Y |
| GFPT2_HUMAN  | GFPT2        | O94808 | Glutamine--fructose-6-phosphate aminotransferase [isomerizing] 2 (EC 2 | 16.3 | 50 | 32 | 2  | 6  | 11 | Y |
| TS101_HUMAN  | TSG101       | Q99816 | Tumor susceptibility gene 101 protein (ESCRT-I complex subunit TSG101) | 25.1 | 50 | 6  | 12 | 26 | 8  | Y |
| B7Z2N4_HUMAN | B7Z2N4_HUMAN | B7Z2N4 | cDNA FLJ56074, highly similar to 150 kDa oxygen-regulated protein (Orp | 19.1 | 50 | 41 | 1  | 2  | 6  |   |
| PLOD2_HUMAN  | PLOD2        | O00469 | Procollagen-lysine,2-oxoglutarate 5-dioxygenase 2 (EC 1.14.11.4) (Lysy | 19.7 | 50 | 25 | 17 | 7  | 2  | Y |
| RTCB_HUMAN   | RTCB         | Q9Y310 | tRNA-splicing ligase RtcB homolog (EC 6.5.1.3)                         | 25   | 49 | 13 | 1  | 11 | 25 |   |

|              |              |        |                                                                           |      |    |    |    |    |    |   |
|--------------|--------------|--------|---------------------------------------------------------------------------|------|----|----|----|----|----|---|
| RS24_HUMAN   | RPS24        | P62847 | 40S ribosomal protein S24                                                 | 29.3 | 49 | 12 | 11 | 9  | 19 | Y |
| E7EUU4_HUMAN | EIF4G1       | E7EUU4 | Eukaryotic translation initiation factor 4 gamma 1                        | 9.81 | 49 | 27 | 1  | 8  | 15 | Y |
| ARP2_HUMAN   | ACTR2        | P61160 | Actin-related protein 2 (Actin-like protein 2)                            | 21.8 | 49 | 11 | 14 | 11 | 14 | Y |
| B3KVN0_HUMAN | B3KVN0_HUMAN | B3KVN0 | cDNA FLJ16785 fis, clone NT2RI2015342, highly similar to Solute carrier   | 9.13 | 49 | 26 | 3  | 7  | 13 |   |
| Q59EF6_HUMAN | Q59EF6_HUMAN | Q59EF6 | Calpain 2, large [catalytic] subunit variant (Fragment)                   | 19.5 | 48 | 12 | 1  | 2  | 33 |   |
| J3KN16_HUMAN | KIAA0368     | J3KN16 | Proteasome-associated protein ECM29 homolog                               | 7.78 | 48 | 12 | 2  | 15 | 21 | Y |
| APT_HUMAN    | APRT         | P07741 | Adenine phosphoribosyltransferase (APRT) (EC 2.4.2.7)                     | 57.2 | 48 | 13 | 5  | 12 | 20 | Y |
| FLII_HUMAN   | FLII         | Q13045 | Protein flightless-1 homolog                                              | 11   | 48 | 12 | 5  | 12 | 19 | Y |
| B2R6K4_HUMAN | B2R6K4_HUMAN | B2R6K4 | cDNA, FLJ92996, highly similar to Homo sapiens guanine nucleotide bind    | 22.1 | 48 | 14 | 13 | 7  | 15 |   |
| A8K3C3_HUMAN | A8K3C3_HUMAN | A8K3C3 | T-complex protein 1 subunit delta                                         | 20.4 | 48 | 12 | 10 | 14 | 12 |   |
| B4E175_HUMAN | B4E175_HUMAN | B4E175 | cDNA FLJ54775, highly similar to Syntaxin-binding protein 2               | 21.5 | 48 | 25 | 16 | 1  | 5  |   |
| RS9_HUMAN    | RPS9         | P46781 | 40S ribosomal protein S9                                                  | 41.2 | 47 | 17 | 4  | 2  | 26 | Y |
| FERM2_HUMAN  | FERMT2       | Q96AC1 | Fermitin family homolog 2 (Kindlin-2) (Mitogen-inducible gene 2 protein)  | 19   | 47 | 14 | 9  | 1  | 23 | Y |
| RL10_HUMAN   | RPL10        | P27635 | 60S ribosomal protein L10 (Laminin receptor homolog) (Protein QM) (Tum)   | 15.4 | 47 | 19 | 6  | 2  | 22 | Y |
| RS15A_HUMAN  | RPS15A       | P62244 | 40S ribosomal protein S15a                                                | 36.9 | 47 | 14 | 7  | 10 | 17 | Y |
| E7ES43_HUMAN | HSPA4L       | E7ES43 | Heat shock 70 kDa protein 4L                                              | 8.28 | 47 | 12 | 6  | 17 | 13 | Y |
| ARF1_HUMAN   | ARF1         | P84077 | ADP-ribosylation factor 1                                                 | 37   | 47 | 14 | 9  | 11 | 13 | Y |
| SP16H_HUMAN  | SUPT16H      | Q9Y5B9 | FACT complex subunit SPT16 (Chromatin-specific transcription elongation)  | 15   | 46 | 10 | 1  | 9  | 28 | Y |
| B0QZ18_HUMAN | CPNE1        | B0QZ18 | Copine-1 (HCG38213, isoform CRA_b)                                        | 15.5 | 46 | 14 | 4  | 4  | 25 | Y |
| A8K6Y1_HUMAN | A8K6Y1_HUMAN | A8K6Y1 | cDNA FLJ75526, highly similar to Homo sapiens proliferation-associated    | 32.7 | 46 | 13 | 1  | 17 | 16 |   |
| C9JV86_HUMAN | CD63         | C9JV86 | CD63 antigen                                                              | 5.08 | 46 | 10 | 12 | 12 | 12 | Y |
| B2RWP9_HUMAN | MYH10        | B2RWP9 | MYH10 protein                                                             | 4.79 | 45 | 21 | 11 | 2  | 15 | Y |
| B5BTY4_HUMAN | DDX3X        | B5BTY4 | ATP-dependent RNA helicase DDX3X                                          | 19   | 45 | 17 | 6  | 10 | 13 | Y |
| I433G_HUMAN  | YWHAG        | P61981 | 14-3-3 protein gamma (Protein kinase C inhibitor protein 1) (KCIP-1) [    | 32   | 45 | 19 | 11 | 4  | 12 | Y |
| SEPT2_HUMAN  | Sep-02       | Q15019 | Septin-2 (Neural precursor cell expressed developmentally down-regulated) | 26.3 | 45 | 10 | 15 | 10 | 10 | Y |
| ARP3_HUMAN   | ACTR3        | P61158 | Actin-related protein 3 (Actin-like protein 3)                            | 16.5 | 45 | 21 | 8  | 5  | 10 | Y |
| PSA5_HUMAN   | PSMA5        | P28066 | Proteasome subunit alpha type-5 (EC 3.4.25.1) (Macropain zeta chain) (    | 29.9 | 45 | 12 | 1  | 25 | 7  | Y |

|              |              |        |                                                                        |      |    |    |    |    |    |   |
|--------------|--------------|--------|------------------------------------------------------------------------|------|----|----|----|----|----|---|
| B7Z5J7_HUMAN | B7Z5J7_HUMAN | B7Z5J7 | cDNA FLJ58682, highly similar to Vesicle-fusing ATPase (EC 3.6.4.6)    | 18.4 | 44 | 17 | 9  | 7  | 13 |   |
| RL12_HUMAN   | RPL12        | P30050 | 60S ribosomal protein L12                                              | 33.9 | 44 | 10 | 9  | 16 | 11 | Y |
| H7C410_HUMAN | GPC1         | H7C410 | Glypican-1 (Fragment)                                                  | 12.4 | 44 | 11 | 9  | 18 | 7  | Y |
| ACACA_HUMAN  | ACACA        | Q13085 | Acetyl-CoA carboxylase 1 (ACC1) (EC 6.4.1.2) (ACC-alpha) [Includes: Bi | 9.42 | 44 | 8  | 1  | 31 | 4  | Y |
| PSB5_HUMAN   | PSMB5        | P28074 | Proteasome subunit beta type-5 (EC 3.4.25.1) (Macropain epsilon chain) | 35.7 | 44 | 5  | 3  | 34 | 2  | Y |
| SYYC_HUMAN   | YARS         | P54577 | Tyrosine--tRNA ligase, cytoplasmic (EC 6.1.1.1) (Tyrosyl-tRNA syntheta | 28.2 | 43 | 11 | 2  | 9  | 24 | Y |
| ETFA_HUMAN   | ETFA         | P13804 | Electron transfer flavoprotein subunit alpha, mitochondrial (Alpha-ETF | 24.3 | 43 | 4  | 5  | 17 | 17 | Y |
| PRS8_HUMAN   | PSMC5        | P62195 | 26S protease regulatory subunit 8 (26S proteasome AAA-ATPase subunit R | 28.8 | 43 | 17 | 1  | 11 | 15 | Y |
| RL5_HUMAN    | RPL5         | P46777 | 60S ribosomal protein L5                                               | 34   | 43 | 16 | 6  | 6  | 15 | Y |
| PRS6B_HUMAN  | PSMC4        | P43686 | 26S protease regulatory subunit 6B (26S proteasome AAA-ATPase subunit  | 17.7 | 43 | 12 | 5  | 17 | 9  | Y |
| PSA7_HUMAN   | PSMA7        | O14818 | Proteasome subunit alpha type-7 (EC 3.4.25.1) (Proteasome subunit RC6- | 29.8 | 43 | 8  | 6  | 22 | 7  | Y |
| DSG2_HUMAN   | DSG2         | Q14126 | Desmoglein-2 (Cadherin family member 5) (HDGC)                         | 10.6 | 42 | 4  | 13 | 3  | 22 | Y |
| D3DV26_HUMAN | S100A10      | D3DV26 | S100 calcium binding protein A10 (Annexin II ligand, calpactin I, ligh | 15.6 | 42 | 12 | 9  | 9  | 13 | Y |
| RS7_HUMAN    | RPS7         | P62081 | 40S ribosomal protein S7                                               | 22.7 | 42 | 12 | 8  | 9  | 13 | Y |
| VIGLN_HUMAN  | HDLBP        | Q00341 | Vigilin (High density lipoprotein-binding protein) (HDL-binding protei | 11.4 | 42 | 8  | 4  | 18 | 12 | Y |
| J3KQ32_HUMAN | OLA1         | J3KQ32 | Obg-like ATPase 1                                                      | 16.1 | 42 | 13 | 7  | 12 | 10 | Y |
| ACOC_HUMAN   | ACO1         | P21399 | Cytoplasmic aconitate hydratase (Aconitase) (EC 4.2.1.3) (Citrate hydr | 7.65 | 41 | 19 | 6  | 6  | 10 | Y |
| S10AB_HUMAN  | S100A11      | P31949 | Protein S100-A11 (Calgizzarin) (Metastatic lymph node gene 70 protein) | 41   | 41 | 21 | 4  | 7  | 9  | Y |
| B2RDE1_HUMAN | B2RDE1_HUMAN | B2RDE1 | cDNA, FLJ96568, highly similar to Homo sapiens tropomyosin 3 (TPM3), m | 28.6 | 41 | 28 | 4  | 3  | 6  |   |
| FKBP4_HUMAN  | FKBP4        | Q02790 | Peptidyl-prolyl cis-trans isomerase FKBP4 (PPIase FKBP4) (EC 5.2.1.8)  | 15.7 | 41 | 10 | 6  | 20 | 5  | Y |
| B7Z1R5_HUMAN | ATP6V1A      | B7Z1R5 | V-type proton ATPase catalytic subunit A (cDNA FLJ51804, highly simila | 15.4 | 41 | 17 | 9  | 9  | 5  | Y |
| PSA4_HUMAN   | PSMA4        | P25789 | Proteasome subunit alpha type-4 (EC 3.4.25.1) (Macropain subunit C9) ( | 26.8 | 41 | 8  | 3  | 26 | 4  | Y |
| PSA3_HUMAN   | PSMA3        | P25788 | Proteasome subunit alpha type-3 (EC 3.4.25.1) (Macropain subunit C8) ( | 35.3 | 41 | 10 | 3  | 27 | 1  | Y |
| A8K590_HUMAN | A8K590_HUMAN | A8K590 | cDNA FLJ77456, highly similar to Homo sapiens interleukin enhancer bin | 20.5 | 40 | 9  | 6  | 6  | 21 |   |
| DIP2B_HUMAN  | DIP2B        | Q9P265 | Disco-interacting protein 2 homolog B (DIP2 homolog B)                 | 9.2  | 40 | 10 | 8  | 6  | 16 | Y |
| TNPO1_HUMAN  | TNPO1        | Q92973 | Transportin-1 (Importin beta-2) (Karyopherin beta-2) (M9 region intera | 15.8 | 40 | 21 | 4  | 7  | 13 | Y |
| A8K9P0_HUMAN | A8K9P0_HUMAN | A8K9P0 | cDNA FLJ78413, highly similar to Homo sapiens albumin, mRNA            | 8.88 | 40 | 9  | 9  | 11 | 11 |   |



|              |              |        |                                                                        |      |    |    |    |    |    |   |
|--------------|--------------|--------|------------------------------------------------------------------------|------|----|----|----|----|----|---|
| SEPT9_HUMAN  | Sep-09       | Q9UHD8 | Septin-9 (MLL septin-like fusion protein MSF-A) (MLL septin-like fusio | 14.8 | 40 | 12 | 4  | 15 | 8  | Y |
| MAP1B_HUMAN  | MAP1B        | P46821 | Microtubule-associated protein 1B (MAP-1B) [Cleaved into: MAP1B heavy  | 7.29 | 40 | 10 | 2  | 24 | 5  | Y |
| RLA2_HUMAN   | RPLP2        | P05387 | 60S acidic ribosomal protein P2 (Renal carcinoma antigen NY-REN-44)    | 55.7 | 39 | 12 | 5  | 5  | 17 | Y |
| E9PN11_HUMAN | RHOC         | E9PN11 | Rho-related GTP-binding protein RhoC (Fragment)                        | 25.3 | 39 | 11 | 12 | 1  | 15 | Y |
| ATPA_HUMAN   | ATP5A1       | P25705 | ATP synthase subunit alpha, mitochondrial                              | 22.1 | 39 | 2  | 7  | 16 | 14 | Y |
| INF2_HUMAN   | INF2         | Q27J81 | Inverted formin-2 (HBEBP2-binding protein C)                           | 7.61 | 39 | 13 | 3  | 10 | 13 | Y |
| B2R983_HUMAN | B2R983_HUMAN | B2R983 | cDNA, FLJ94267, highly similar to Homo sapiens glutathione S-transfera | 27   | 39 | 16 | 3  | 9  | 11 |   |
| FLOT1_HUMAN  | FLOT1        | O75955 | Flotillin-1                                                            | 23.4 | 39 | 6  | 14 | 11 | 8  | Y |
| RINI_HUMAN   | RNH1         | P13489 | Ribonuclease inhibitor (Placental ribonuclease inhibitor) (Placental R | 12.8 | 39 | 10 | 13 | 8  | 8  | Y |
| PSME3_HUMAN  | PSME3        | P61289 | Proteasome activator complex subunit 3 (11S regulator complex subunit  | 26.4 | 39 | 16 | 2  | 14 | 7  | Y |
| AL7A1_HUMAN  | ALDH7A1      | P49419 | Alpha-aminoadipic semialdehyde dehydrogenase (Alpha-AASA dehydrogenase | 25.2 | 38 | 4  | 3  | 7  | 25 | Y |
| HCD2_HUMAN   | HSD17B10     | Q99714 | 3-hydroxyacyl-CoA dehydrogenase type-2 (EC 1.1.1.35) (17-beta-hydroxys | 43.3 | 38 | 9  | 1  | 9  | 20 | Y |
| J3KRX5_HUMAN | RPL17        | J3KRX5 | 60S ribosomal protein L17 (Fragment)                                   | 34.5 | 38 | 13 | 7  | 4  | 16 | Y |
| B2R5W3_HUMAN | B2R5W3_HUMAN | B2R5W3 | cDNA, FLJ92658, highly similar to Homo sapiens poly (ADP-ribose) polym | 10.8 | 38 | 10 | 4  | 10 | 15 |   |
| HPRT_HUMAN   | HPRT1        | P00492 | Hypoxanthine-guanine phosphoribosyltransferase (HGPR) (HGPRase) (EC    | 38.1 | 38 | 19 | 5  | 3  | 12 | Y |
| MOT4_HUMAN   | SLC16A3      | O15427 | Monocarboxylate transporter 4 (MCT 4) (Solute carrier family 16 member | 17   | 38 | 17 | 8  | 2  | 11 | Y |
| HS105_HUMAN  | HSPH1        | Q92598 | Heat shock protein 105 kDa (Antigen NY-CO-25) (Heat shock 110 kDa prot | 16.7 | 38 | 17 | 11 | 6  | 5  | Y |
| RS10_HUMAN   | RPS10        | P46783 | 40S ribosomal protein S10                                              | 23.6 | 37 | 15 | 2  | 6  | 16 | Y |
| G5E948_HUMAN | MAP4K4       | G5E948 | Mitogen-activated protein kinase kinase kinase kinase 4 (Mitogen-activ | 6.67 | 37 | 9  | 12 | 3  | 14 | Y |
| CPNE3_HUMAN  | CPNE3        | O75131 | Copine-3 (Copine III)                                                  | 16.8 | 37 | 12 | 8  | 3  | 14 | Y |
| PSD12_HUMAN  | PSMD12       | O00232 | 26S proteasome non-ATPase regulatory subunit 12 (26S proteasome regula | 23   | 37 | 13 | 2  | 13 | 9  | Y |
| B4DZI8_HUMAN | COPB2        | B4DZI8 | Coatamer protein complex, subunit beta 2 (Beta prime), isoform CRA_b ( | 11.1 | 37 | 7  | 5  | 18 | 8  | Y |
| B2R6J4_HUMAN | B2R6J4_HUMAN | B2R6J4 | cDNA, FLJ92975, highly similar to Homo sapiens nucleosome assembly pro | 17.3 | 37 | 9  | 8  | 12 | 8  |   |
| COR1C_HUMAN  | CORO1C       | Q9ULV4 | Coronin-1C (Coronin-3) (hCRNN4)                                        | 11   | 37 | 9  | 13 | 6  | 8  | Y |
| A3KC71_HUMAN | okuribin     | A3KC71 | Nuclear envelope protein okuribin                                      | 11.7 | 37 | 5  | 21 | 4  | 7  |   |
| PSA1_HUMAN   | PSMA1        | P25786 | Proteasome subunit alpha type-1 (EC 3.4.25.1) (30 kDa prosomal protein | 38   | 37 | 9  | 2  | 24 | 4  | Y |
| KIF23_HUMAN  | KIF23        | Q02241 | Kinesin-like protein KIF23 (Kinesin-like protein 5) (Mitotic kinesin-1 | 13.5 | 37 | 16 | 9  | 8  | 3  | Y |

|              |              |        |                                                                        |      |    |    |    |    |    |   |
|--------------|--------------|--------|------------------------------------------------------------------------|------|----|----|----|----|----|---|
| GALE_HUMAN   | GALE         | Q14376 | UDP-glucose 4-epimerase (EC 5.1.3.2) (Galactowaldenase) (UDP-galactose | 16.7 | 36 | 20 | 1  | 3  | 15 | Y |
| J3KTA4_HUMAN | DDX5         | J3KTA4 | Probable ATP-dependent RNA helicase DDX5                               | 12.5 | 36 | 12 | 2  | 8  | 14 | Y |
| B4DJA5_HUMAN | RAB5A        | B4DJA5 | Ras-related protein Rab-5A (cDNA FLJ51867, highly similar to Ras-relat | 35.8 | 36 | 16 | 6  | 4  | 9  | Y |
| Q6DEN2_HUMAN | DPYSL3       | Q6DEN2 | DPYSL3 protein                                                         | 23.1 | 35 | 2  | 6  | 1  | 28 | Y |
| B4DNN4_HUMAN | B4DNN4_HUMAN | B4DNN4 | Ribonucleoside-diphosphate reductase (EC 1.17.4.1)                     | 13   | 35 | 3  | 3  | 13 | 17 |   |
| J3QQ67_HUMAN | RPL18        | J3QQ67 | 60S ribosomal protein L18 (Fragment)                                   | 40.5 | 35 | 13 | 6  | 3  | 15 | Y |
| B4DV28_HUMAN | B4DV28_HUMAN | B4DV28 | cDNA FLJ54170, highly similar to Cytosolic nonspecific dipeptidase     | 16.8 | 35 | 13 | 7  | 5  | 10 |   |
| SPB6_HUMAN   | SERPINB6     | P35237 | Serpin B6 (Cytoplasmic antiproteinase) (CAP) (Peptidase inhibitor 6) ( | 22.1 | 35 | 13 | 10 | 1  | 10 | Y |
| Q6NVW7_HUMAN | KPNA2        | Q6NVW7 | Importin subunit alpha                                                 | 19.8 | 35 | 9  | 3  | 14 | 9  | Y |
| PDXK_HUMAN   | PDXK         | O00764 | Pyridoxal kinase (EC 2.7.1.35) (Pyridoxine kinase)                     | 24.7 | 35 | 3  | 4  | 20 | 8  | Y |
| E7EUC7_HUMAN | UGP2         | E7EUC7 | UTP--glucose-1-phosphate uridylyltransferase                           | 13   | 35 | 13 | 10 | 10 | 2  | Y |
| J3KTL2_HUMAN | SRSF1        | J3KTL2 | Serine/arginine-rich-splicing factor 1 (Splicing factor, arginine/seri | 30   | 34 | 10 | 2  | 1  | 21 | Y |
| ROA2_HUMAN   | HNRNPA2B1    | P22626 | Heterogeneous nuclear ribonucleoproteins A2/B1 (hnRNP A2/B1)           | 25.5 | 34 | 11 | 2  | 6  | 15 | Y |
| B1AK87_HUMAN | CAPZB        | B1AK87 | Capping protein (Actin filament) muscle Z-line, beta, isoform CRA_a (F | 23.5 | 34 | 17 | 5  | 5  | 7  | Y |
| KAP0_HUMAN   | PRKAR1A      | P10644 | cAMP-dependent protein kinase type I-alpha regulatory subunit (Tissue- | 23.9 | 33 | 8  | 7  | 4  | 16 | Y |
| PRPS2_HUMAN  | PRPS2        | P11908 | Ribose-phosphate pyrophosphokinase 2 (EC 2.7.6.1) (PPRibP) (Phosphorib | 39   | 33 | 13 | 5  | 4  | 10 | Y |
| GBG12_HUMAN  | GNG12        | Q9UBI6 | Guanine nucleotide-binding protein G(I)/G(S)/G(O) subunit gamma-12     | 50   | 33 | 10 | 10 | 2  | 10 | Y |
| DYN2_HUMAN   | DNM2         | P50570 | Dynamin-2 (EC 3.6.5.5)                                                 | 18.7 | 32 | 4  | 3  | 11 | 15 | Y |
| ARF4_HUMAN   | ARF4         | P18085 | ADP-ribosylation factor 4                                              | 33.9 | 32 | 6  | 6  | 5  | 15 | Y |
| DCTN1_HUMAN  | DCTN1        | Q14203 | Dynactin subunit 1 (150 kDa dynein-associated polypeptide) (DAP-150) ( | 7.67 | 32 | 10 | 3  | 8  | 11 | Y |
| RASN_HUMAN   | NRAS         | P01111 | GTPase NRas (Transforming protein N-Ras)                               | 40.2 | 32 | 11 | 10 | 2  | 9  | Y |
| SYWC_HUMAN   | WARS         | P23381 | Tryptophan--tRNA ligase, cytoplasmic (EC 6.1.1.2) (Interferon-induced  | 19.3 | 32 | 21 | 1  | 1  | 9  | Y |
| RAGP1_HUMAN  | RANGAP1      | P46060 | Ran GTPase-activating protein 1 (RanGAP1)                              | 16   | 32 | 17 | 4  | 6  | 6  | Y |
| H12_HUMAN    | HIST1H1C     | P16403 | Histone H1.2 (Histone H1c) (Histone H1d) (Histone H1s-1)               | 36.2 | 31 | 7  | 2  | 3  | 20 | Y |
| IF2A_HUMAN   | EIF2S1       | P05198 | Eukaryotic translation initiation factor 2 subunit 1 (Eukaryotic trans | 22.9 | 31 | 14 | 1  | 5  | 13 | Y |
| MMS19_HUMAN  | MMS19        | Q96T76 | MMS19 nucleotide excision repair protein homolog (hMMS19) (MET18 homol | 11.7 | 31 | 9  | 2  | 8  | 12 | Y |
| PDCD6_HUMAN  | PDCD6        | O75340 | Programmed cell death protein 6 (Apoptosis-linked gene 2 protein) (Pro | 36.6 | 31 | 15 | 3  | 5  | 10 | Y |

|              |               |        |                                                                         |      |    |    |    |    |    |   |
|--------------|---------------|--------|-------------------------------------------------------------------------|------|----|----|----|----|----|---|
| RHG01_HUMAN  | ARHGAP1       | Q07960 | Rho GTPase-activating protein 1 (CDC42 GTPase-activating protein) (GTP) | 17.1 | 31 | 9  | 7  | 4  | 10 | Y |
| BIEA_HUMAN   | BLVRA         | P53004 | Biliverdin reductase A (BVR A) (EC 1.3.1.24) (Biliverdin-IX alpha-redu  | 22.3 | 31 | 11 | 3  | 10 | 6  | Y |
| MDHC_HUMAN   | MDH1          | P40925 | Malate dehydrogenase, cytoplasmic (EC 1.1.1.37) (Cytosolic malate dehy  | 24.3 | 31 | 17 | 4  | 6  | 6  | Y |
| Q6NUK7_HUMAN | LYN           | Q6NUK7 | LYN protein (Fragment)                                                  | 19.9 | 31 | 16 | 3  | 5  | 6  | Y |
| BZW1_HUMAN   | BZW1          | Q7L1Q6 | Basic leucine zipper and W2 domain-containing protein 1 (Protein Orf)   | 17.7 | 31 | 11 | 4  | 13 | 5  | Y |
| LAT1_HUMAN   | SLC7A5        | Q01650 | Large neutral amino acids transporter small subunit 1 (4F2 light chain  | 11.2 | 31 | 14 | 4  | 9  | 4  | Y |
| B3KQT9_HUMAN | B3KQT9_HUMAN  | B3KQT9 | cDNA PSEC0175 fis, clone OVARC1000169, highly similar to Protein disul  | 24.6 | 31 | 16 | 11 | 2  | 2  |   |
| H2AY_HUMAN   | H2AFY         | O75367 | Core histone macro-H2A.1 (Histone macroH2A1) (mH2A1) (Histone H2A.y) (  | 29.8 | 30 | 6  | 2  | 3  | 19 | Y |
| B2R806_HUMAN | EIF3E         | B2R806 | Eukaryotic translation initiation factor 3 subunit E (eIF3e) (Eukaryot  | 21.6 | 30 | 7  | 1  | 8  | 16 | Y |
| A6NJA2_HUMAN | USP14         | A6NJA2 | Ubiquitin carboxyl-terminal hydrolase (EC 3.4.19.12)                    | 8.93 | 30 | 7  | 3  | 10 | 10 | Y |
| XPP1_HUMAN   | XPNPEP1       | Q9NQW7 | Xaa-Pro aminopeptidase 1 (EC 3.4.11.9) (Aminoacylproline aminopeptidas  | 11.7 | 30 | 11 | 4  | 6  | 9  | Y |
| F8W914_HUMAN | RTN4          | F8W914 | Reticulon                                                               | 12.8 | 30 | 7  | 8  | 9  | 7  | Y |
| E7ES33_HUMAN | Sep-07        | E7ES33 | Septin-7                                                                | 9.17 | 30 | 8  | 8  | 7  | 7  | Y |
| AT1B1_HUMAN  | ATP1B1        | P05026 | Sodium/potassium-transporting ATPase subunit beta-1 (Sodium/potassium-  | 18.5 | 30 | 15 | 6  | 4  | 5  | Y |
| B4DZF2_HUMAN | B4DZF2_HUMAN  | B4DZF2 | cDNA FLJ59571, highly similar to Eukaryotic translation initiation fac  | 10   | 29 | 5  | 1  | 7  | 19 |   |
| Q9H9B7_HUMAN | Q9H9B7_HUMAN  | Q9H9B7 | Coatomer subunit gamma                                                  | 11   | 29 | 3  | 4  | 7  | 16 |   |
| THIL_HUMAN   | ACAT1         | P24752 | Acetyl-CoA acetyltransferase, mitochondrial (EC 2.3.1.9) (Acetoacetyl-  | 18.7 | 29 | 6  | 2  | 7  | 14 | Y |
| Q5JQ44_HUMAN | DKFZp547A0616 | Q5JQ44 | Putative uncharacterized protein DKFZp547A0616 (Fragment)               | 35.4 | 29 | 10 | 6  | 2  | 11 |   |
| E9PAV3_HUMAN | NACA          | E9PAV3 | Nascent polypeptide-associated complex subunit alpha                    | 3.46 | 29 | 10 | 3  | 7  | 9  | Y |
| APIG1_HUMAN  | APIG1         | O43747 | AP-1 complex subunit gamma-1 (Adapter-related protein complex 1 subuni  | 9.25 | 29 | 7  | 7  | 7  | 8  | Y |
| J3QQX2_HUMAN | ARHGDI1       | J3QQX2 | Rho GDP-dissociation inhibitor 1                                        | 19.1 | 29 | 12 | 6  | 4  | 7  | Y |
| EF1D_HUMAN   | EEF1D         | P29692 | Elongation factor 1-delta (EF-1-delta) (Antigen NY-CO-4)                | 22.8 | 29 | 12 | 3  | 8  | 6  | Y |
| RAB5B_HUMAN  | RAB5B         | P61020 | Ras-related protein Rab-5B                                              | 21.4 | 29 | 13 | 5  | 5  | 6  | Y |
| ARPC2_HUMAN  | ARPC2         | O15144 | Actin-related protein 2/3 complex subunit 2 (Arp2/3 complex 34 kDa sub  | 29   | 29 | 13 | 8  | 7  | 3  | Y |
| OXSRI_HUMAN  | OXSRI         | O95747 | Serine/threonine-protein kinase OSR1 (EC 2.7.11.1) (Oxidative stress-r  | 14.6 | 28 | 9  | 2  | 3  | 14 | Y |
| PTPRJ_HUMAN  | PTPRJ         | Q12913 | Receptor-type tyrosine-protein phosphatase eta (Protein-tyrosine phosph | 8.3  | 28 | 7  | 4  | 5  | 12 | Y |

|              |              |        |                                                                        |      |    |    |    |    |    |   |
|--------------|--------------|--------|------------------------------------------------------------------------|------|----|----|----|----|----|---|
| A8KA19_HUMAN | A8KA19_HUMAN | A8KA19 | cDNA FLJ75831, highly similar to Homo sapiens exportin, tRNA (nuclear  | 9.15 | 28 | 6  | 4  | 8  | 10 |   |
| Q6IBU0_HUMAN | EIF5         | Q6IBU0 | EIF5 protein                                                           | 10.7 | 28 | 8  | 5  | 8  | 9  | Y |
| DRG1_HUMAN   | DRG1         | Q9Y295 | Developmentally-regulated GTP-binding protein 1 (DRG-1) (Neural precur | 18.8 | 28 | 10 | 2  | 7  | 9  | Y |
| B4DTC3_HUMAN | HNRNPD       | B4DTC3 | Heterogeneous nuclear ribonucleoprotein D0 (cDNA FLJ54150, highly simi | 16.8 | 28 | 8  | 6  | 8  | 5  | Y |
| A8K0T9_HUMAN | A8K0T9_HUMAN | A8K0T9 | cDNA FLJ75422, highly similar to Homo sapiens capping protein (actin f | 24.5 | 28 | 11 | 5  | 7  | 5  |   |
| H0YGW7_HUMAN | ABCF1        | H0YGW7 | ATP-binding cassette sub-family F member 1 (Fragment)                  | 17.1 | 27 | 5  | 4  | 2  | 16 | Y |
| DC1L1_HUMAN  | DYNC1LI1     | Q9Y6G9 | Cytoplasmic dynein 1 light intermediate chain 1 (LIC1) (Dynein light c | 16.6 | 27 | 6  | 1  | 9  | 11 | Y |
| Q6NZ55_HUMAN | RPL13        | Q6NZ55 | 60S ribosomal protein L13                                              | 22.7 | 27 | 10 | 4  | 5  | 8  | Y |
| VTNC_HUMAN   | VTN          | P04004 | Vitronectin (VN) (S-protein) (Serum-spreading factor) (V75) [Cleaved i | 15.1 | 27 | 3  | 3  | 15 | 6  | Y |
| B4DRT4_HUMAN | B4DRT4_HUMAN | B4DRT4 | cDNA FLJ51535, highly similar to Phosphatidylethanolamine-binding prot | 31.6 | 27 | 10 | 8  | 4  | 5  |   |
| FLOT2_HUMAN  | FLOT2        | Q14254 | Flotillin-2 (Epidermal surface antigen) (ESA) (Membrane component chro | 34.6 | 27 | 5  | 12 | 8  | 1  | Y |
| A8K690_HUMAN | A8K690_HUMAN | A8K690 | cDNA FLJ76863, highly similar to Homo sapiens stress-induced-phosphopr | 24.5 | 27 | 20 | 3  | 4  | 1  |   |
| Q05D43_HUMAN | YBX1         | Q05D43 | YBX1 protein (Fragment)                                                | 19.5 | 26 | 5  | 2  | 5  | 14 | Y |
| PCH2_HUMAN   | TRIP13       | Q15645 | Pachytene checkpoint protein 2 homolog (Human papillomavirus type 16 E | 21.3 | 26 | 10 | 1  | 4  | 11 | Y |
| IPYR_HUMAN   | PPA1         | Q15181 | Inorganic pyrophosphatase (EC 3.6.1.1) (Pyrophosphate phospho-hydrolas | 20.4 | 26 | 10 | 3  | 5  | 9  | Y |
| THIO_HUMAN   | TXN          | P10599 | Thioredoxin (Trx) (ATL-derived factor) (ADF) (Surface-associated sulph | 42.9 | 26 | 11 | 4  | 4  | 9  | Y |
| B2RE34_HUMAN | B2RE34_HUMAN | B2RE34 | cDNA, FLJ96901, highly similar to Homo sapiens Rac GTPase activating p | 11.7 | 26 | 11 | 12 | 1  | 4  |   |
| PRDX5_HUMAN  | PRDX5        | P30044 | Peroxiredoxin-5, mitochondrial (EC 1.11.1.15) (Alu corepressor 1) (Ant | 36.9 | 26 | 17 | 5  | 2  | 3  | Y |
| B2R9S4_HUMAN | B2R9S4_HUMAN | B2R9S4 | cDNA, FLJ94534, highly similar to Homo sapiens capping protein (actin  | 17.2 | 25 | 7  | 1  | 1  | 17 |   |
| LRC47_HUMAN  | LRRC47       | Q8N1G4 | Leucine-rich repeat-containing protein 47                              | 15.4 | 25 | 3  | 2  | 4  | 16 | Y |
| H13_HUMAN    | HIST1H1D     | P16402 | Histone H1.3 (Histone H1c) (Histone H1s-2)                             | 21.3 | 25 | 6  | 2  | 3  | 15 | Y |
| AAKG1_HUMAN  | PRKAG1       | P54619 | 5'-AMP-activated protein kinase subunit gamma-1 (AMPK gamma1) (AMPK su | 15.1 | 25 | 10 | 1  | 3  | 11 | Y |
| E5RI99_HUMAN | RPL30        | E5RI99 | 60S ribosomal protein L30 (Fragment)                                   | 35.1 | 25 | 8  | 2  | 6  | 10 | Y |
| RL21_HUMAN   | RPL21        | P46778 | 60S ribosomal protein L21                                              | 16.2 | 25 | 7  | 6  | 4  | 8  | Y |
| M0R0F0_HUMAN | RPS5         | M0R0F0 | 40S ribosomal protein S5 (Fragment)                                    | 27   | 25 | 7  | 4  | 7  | 7  | Y |
| SCRIB_HUMAN  | SCRIB        | Q14160 | Protein scribble homolog (Scribble) (hScrib) (Protein LAP4)            | 6.13 | 25 | 15 | 2  | 2  | 5  | Y |

|              |              |        |                                                                        |      |    |    |   |    |    |   |
|--------------|--------------|--------|------------------------------------------------------------------------|------|----|----|---|----|----|---|
| FRIL_HUMAN   | FTL          | P02792 | Ferritin light chain (Ferritin L subunit)                              | 21.7 | 25 | 10 | 4 | 7  | 3  | Y |
| B3KU28_HUMAN | LONP1        | B3KU28 | Lon protease homolog, mitochondrial (EC 3.4.21.-) (Lon protease-like p | 11.7 | 24 | 1  | 1 | 4  | 18 | Y |
| RL14_HUMAN   | RPL14        | P50914 | 60S ribosomal protein L14 (CAG-ISL 7)                                  | 30.7 | 24 | 7  | 3 | 2  | 13 | Y |
| TNIK_HUMAN   | TNIK         | Q9UKE5 | TRAF2 and NCK-interacting protein kinase (EC 2.7.11.1)                 | 3.31 | 24 | 7  | 7 | 1  | 10 | Y |
| B4DQ93_HUMAN | B4DQ93_HUMAN | B4DQ93 | cDNA FLJ52996, highly similar to Syntenin-1                            | 16.9 | 24 | 1  | 7 | 10 | 7  |   |
| DLG1_HUMAN   | DLG1         | Q12959 | Disks large homolog 1 (Synapse-associated protein 97) (SAP-97) (SAP97) | 5.97 | 24 | 10 | 6 | 1  | 7  | Y |
| RS13_HUMAN   | RPS13        | P62277 | 40S ribosomal protein S13                                              | 28.5 | 24 | 13 | 2 | 1  | 7  | Y |
| I3L397_HUMAN | EIF5A        | I3L397 | Eukaryotic translation initiation factor 5A-1 (Fragment)               | 16.3 | 24 | 7  | 7 | 7  | 6  | Y |
| A6NFQ9_HUMAN | Sep-08       | A6NFQ9 | Septin-8                                                               | 9.09 | 24 | 9  | 4 | 5  | 6  | Y |
| A8K607_HUMAN | A8K607_HUMAN | A8K607 | cDNA FLJ76855, highly similar to Homo sapiens exportin 7 (XPO7), mRNA  | 12.2 | 24 | 3  | 1 | 17 | 4  |   |
| NAGK_HUMAN   | NAGK         | Q9UJ70 | N-acetyl-D-glucosamine kinase (N-acetylglucosamine kinase) (EC 2.7.1.5 | 18.6 | 23 | 3  | 1 | 4  | 15 | Y |
| ARF6_HUMAN   | ARF6         | P62330 | ADP-ribosylation factor 6                                              | 18.3 | 23 | 6  | 3 | 3  | 12 | Y |
| DNJB1_HUMAN  | DNAJB1       | P25685 | DnaJ homolog subfamily B member 1 (DnaJ protein homolog 1) (Heat shock | 18.5 | 23 | 6  | 3 | 6  | 10 | Y |
| A6NNI4_HUMAN | CD9          | A6NNI4 | CD9 antigen                                                            | 20.8 | 23 | 6  | 6 | 5  | 6  | Y |
| CAZA2_HUMAN  | CAPZA2       | P47755 | F-actin-capping protein subunit alpha-2 (CapZ alpha-2)                 | 19.2 | 23 | 5  | 5 | 9  | 4  | Y |
| LASP1_HUMAN  | LASP1        | Q14847 | LIM and SH3 domain protein 1 (LASP-1) (Metastatic lymph node gene 50 p | 20.7 | 23 | 12 | 3 | 6  | 2  | Y |
| SPEE_HUMAN   | SRM          | P19623 | Spermidine synthase (SPDSY) (EC 2.5.1.16) (Putrescine aminopropyltrans | 15.2 | 22 | 3  | 2 | 2  | 16 | Y |
| DNM1L_HUMAN  | DNM1L        | O00429 | Dynamin-1-like protein (EC 3.6.5.5) (Dnm1p/Vps1p-like protein) (DVLP)  | 10.3 | 22 | 4  | 2 | 4  | 13 | Y |
| CISY_HUMAN   | CS           | O75390 | Citrate synthase, mitochondrial (EC 2.3.3.1)                           | 10.3 | 22 | 7  | 2 | 5  | 9  | Y |
| H31T_HUMAN   | HIST3H3      | Q16695 | Histone H3.1t (H3/t) (H3t) (H3/g)                                      | 19.9 | 22 | 4  | 3 | 6  | 8  | Y |
| IGSF8_HUMAN  | IGSF8        | Q969P0 | Immunoglobulin superfamily member 8 (IgSF8) (CD81 partner 3) (Glu-Ttp- | 8.16 | 22 | 7  | 2 | 5  | 8  | Y |
| B4DN67_HUMAN | KIRREL       | B4DN67 | Kin of IRRE-like protein 1 (cDNA FLJ56360, highly similar to Kin of IR | 8.52 | 22 | 10 | 1 | 4  | 7  | Y |
| PURA2_HUMAN  | ADSS         | P30520 | Adenylosuccinate synthetase isozyme 2 (AMPSase 2) (AdSS 2) (EC 6.3.4.4 | 8.33 | 22 | 9  | 3 | 5  | 5  | Y |
| B4DSN3_HUMAN | B4DSN3_HUMAN | B4DSN3 | cDNA FLJ60345, highly similar to Protein transport protein Sec24C      | 6.36 | 22 | 8  | 4 | 7  | 4  |   |
| Q6FHJ5_HUMAN | SCAMP3       | Q6FHJ5 | SCAMP3 protein (Fragment)                                              | 9.8  | 22 | 12 | 4 | 3  | 3  | Y |
| Q9BQQ5_HUMAN | L27a         | Q9BQQ5 | Ribosomal protein L27a                                                 | 51.9 | 21 | 7  | 2 | 2  | 11 |   |

|              |              |        |                                                                         |      |    |    |   |    |    |   |
|--------------|--------------|--------|-------------------------------------------------------------------------|------|----|----|---|----|----|---|
| H3BLU7_HUMAN | AKR7A2       | H3BLU7 | Aflatoxin B1 aldehyde reductase member 2 (Fragment)                     | 14.6 | 21 | 4  | 3 | 4  | 10 | Y |
| B4E1U9_HUMAN | B4E1U9_HUMAN | B4E1U9 | cDNA FLJ54776, highly similar to Cell division control protein 42 homo  | 17.8 | 21 | 8  | 4 | 3  | 6  |   |
| TRIM25_HUMAN | TRIM25       | Q14258 | E3 ubiquitin/ISG15 ligase TRIM25 (EC 6.3.2.19) (EC 6.3.2.n3) (Estrogen  | 10.2 | 21 | 13 | 1 | 1  | 6  | Y |
| Q59F71_HUMAN | Q59F71_HUMAN | Q59F71 | Bone morphogenetic protein 1 isoform 1, variant (Fragment)              | 3.99 | 21 | 8  | 2 | 6  | 5  |   |
| F2Z393_HUMAN | TALDO1       | F2Z393 | Transaldolase (EC 2.2.1.2)                                              | 22.3 | 21 | 5  | 3 | 12 | 2  | Y |
| MET_HUMAN    | MET          | P08581 | Hepatocyte growth factor receptor (HGF receptor) (EC 2.7.10.1) (HGF/SF  | 7.48 | 21 | 10 | 4 | 5  | 2  | Y |
| PSB2_HUMAN   | PSMB2        | P49721 | Proteasome subunit beta type-2 (EC 3.4.25.1) (Macropain subunit C7-I)   | 29.9 | 21 | 6  | 4 | 10 | 1  | Y |
| 2ABA_HUMAN   | PPP2R2A      | P63151 | Serine/threonine-protein phosphatase 2A 55 kDa regulatory subunit B al  | 11.9 | 20 | 6  | 3 | 3  | 9  | Y |
| RUXE_HUMAN   | SNRPE        | P62304 | Small nuclear ribonucleoprotein E (snRNP-E) (Sm protein E) (Sm-E) (SmE) | 29.3 | 20 | 6  | 2 | 4  | 8  | Y |
| ARPC3_HUMAN  | ARPC3        | O15145 | Actin-related protein 2/3 complex subunit 3 (Arp2/3 complex 21 kDa sub  | 19.1 | 20 | 5  | 6 | 4  | 7  | Y |
| F8W6I7_HUMAN | HNRNPA1      | F8W6I7 | Heterogeneous nuclear ribonucleoprotein A1                              | 18.1 | 20 | 11 | 2 | 2  | 7  | Y |
| B0YIW6_HUMAN | ARCN1        | B0YIW6 | Archain 1, isoform CRA_a (Coatomer subunit delta) (Coatomer subunit de  | 13   | 20 | 10 | 1 | 4  | 5  | Y |
| C9J6P4_HUMAN | ZC3HAV1      | C9J6P4 | Zinc finger CCCH-type antiviral protein 1                               | 9.57 | 20 | 12 | 1 | 4  | 4  | Y |
| ADA10_HUMAN  | ADAM10       | O14672 | Disintegrin and metalloproteinase domain-containing protein 10 (ADAM 1  | 9.49 | 20 | 2  | 4 | 13 | 2  | Y |
| A8K4W5_HUMAN | A8K4W5_HUMAN | A8K4W5 | cDNA FLJ76813, highly similar to Homo sapiens acetyl-Coenzyme A acetyl  | 12.6 | 20 | 14 | 1 | 4  | 1  |   |
| ITCH_HUMAN   | ITCH         | Q96J02 | E3 ubiquitin-protein ligase Itchy homolog (Itch) (EC 6.3.2.-) (Atrophi  | 11.6 | 19 | 10 | 1 | 1  | 9  | Y |
| B2RD51_HUMAN | B2RD51_HUMAN | B2RD51 | cDNA, FLJ96455, highly similar to Homo sapiens Down syndrome critical   | 13.9 | 19 | 5  | 2 | 5  | 7  |   |
| K6PF_HUMAN   | PFKM         | P08237 | 6-phosphofructokinase, muscle type (EC 2.7.1.11) (Phosphofructo-1-kina  | 8.97 | 19 | 8  | 2 | 2  | 7  | Y |
| RL11_HUMAN   | RPL11        | P62913 | 60S ribosomal protein L11 (CLL-associated antigen KW-12)                | 23.6 | 19 | 6  | 6 | 3  | 5  | Y |
| ARRD1_HUMAN  | ARRDC1       | Q8N5I2 | Arrestin domain-containing protein 1                                    | 10.4 | 19 | 2  | 5 | 8  | 4  | Y |
| METK2_HUMAN  | MAT2A        | P31153 | S-adenosylmethionine synthase isoform type-2 (AdoMet synthase 2) (EC 2  | 13.9 | 19 | 5  | 1 | 10 | 3  | Y |
| EXOC4_HUMAN  | EXOC4        | Q96A65 | Exocyst complex component 4 (Exocyst complex component Sec8)            | 7.7  | 19 | 7  | 6 | 4  | 3  | Y |
| AP2M1_HUMAN  | AP2M1        | Q96CW1 | AP-2 complex subunit mu (AP-2 mu chain) (Adapter-related protein compl  | 15.6 | 18 | 3  | 3 | 2  | 11 | Y |
| PPAC_HUMAN   | ACP1         | P24666 | Low molecular weight phosphotyrosine protein phosphatase (LMW-PTP) (LM  | 32.9 | 18 | 3  | 2 | 6  | 10 | Y |
| F8W1F5_HUMAN | FMNL3        | F8W1F5 | Formin-like protein 3                                                   | 7.21 | 18 | 5  | 4 | 1  | 10 | Y |
| PRP19_HUMAN  | PRPF19       | Q9UMS4 | Pre-mRNA-processing factor 19 (Nuclear matrix protein 200) (PRP19/PSO4  | 9.92 | 18 | 3  | 2 | 5  | 9  | Y |

|              |              |        |                                                                         |      |    |    |   |   |    |   |
|--------------|--------------|--------|-------------------------------------------------------------------------|------|----|----|---|---|----|---|
| CN166_HUMAN  | C14orf166    | Q9Y224 | UPF0568 protein C14orf166 (CLE7 homolog) (CLE)                          | 22.5 | 18 | 4  | 1 | 5 | 8  | Y |
| B5ME97_HUMAN | Sep-10       | B5ME97 | Septin 10, isoform CRA_c (Septin-10)                                    | 9.01 | 18 | 3  | 4 | 3 | 8  | Y |
| RS25_HUMAN   | RPS25        | P62851 | 40S ribosomal protein S25                                               | 24   | 18 | 8  | 2 | 3 | 7  | Y |
| UAP1_HUMAN   | UAP1         | Q16222 | UDP-N-acetylhexosamine pyrophosphorylase (Antigen X) (AGX) (Sperm-asso) | 10.7 | 18 | 4  | 6 | 1 | 7  | Y |
| A8K4G7_HUMAN | A8K4G7_HUMAN | A8K4G7 | cDNA FLJ78528, highly similar to Homo sapiens vacuolar protein sorting  | 16.7 | 18 | 5  | 2 | 5 | 6  |   |
| MIF_HUMAN    | MIF          | P14174 | Macrophage migration inhibitory factor (MIF) (EC 5.3.2.1) (Glycosylati  | 17.4 | 18 | 6  | 3 | 3 | 6  | Y |
| B4E0U6_HUMAN | B4E0U6_HUMAN | B4E0U6 | cDNA FLJ53687, highly similar to Hsc70-interacting protein              | 12.3 | 18 | 7  | 4 | 1 | 6  |   |
| E9PIF1_HUMAN | CD81         | E9PIF1 | CD81 antigen                                                            | 9.92 | 18 | 7  | 4 | 5 | 5  | Y |
| R4GN98_HUMAN | S100A6       | R4GN98 | Protein S100-A6 (Fragment)                                              | 37.6 | 18 | 5  | 3 | 5 | 5  | Y |
| B7Z992_HUMAN | B7Z992_HUMAN | B7Z992 | cDNA FLJ53698, highly similar to Gelsolin                               | 6.43 | 18 | 2  | 8 | 3 | 5  |   |
| B5BUB5_HUMAN | SSB          | B5BUB5 | Autoantigen La (Fragment)                                               | 6.86 | 18 | 5  | 4 | 6 | 3  | Y |
| A8K5U9_HUMAN | A8K5U9_HUMAN | A8K5U9 | cDNA FLJ75056, highly similar to Homo sapiens phosphatidylinositol bin  | 8.44 | 18 | 6  | 7 | 2 | 3  |   |
| DEK_HUMAN    | DEK          | P35659 | Protein DEK                                                             | 16.3 | 17 | 1  | 2 | 3 | 11 | Y |
| J3KMZ9_HUMAN | LDLR         | J3KMZ9 | Low-density lipoprotein receptor (Fragment)                             | 4.23 | 17 | 1  | 3 | 4 | 10 | Y |
| B4DVS0_HUMAN | SNRNPB       | B4DVS0 | Small nuclear ribonucleoprotein-associated protein                      | 12.8 | 17 | 3  | 2 | 5 | 8  | Y |
| ECHA_HUMAN   | HADHA        | P40939 | Trifunctional enzyme subunit alpha, mitochondrial (78 kDa gastrin-bind  | 6.95 | 17 | 5  | 1 | 4 | 8  | Y |
| Q53HL1_HUMAN | Q53HL1_HUMAN | Q53HL1 | Myosin regulatory light chain MRCL3 variant (Fragment)                  | 18.7 | 17 | 4  | 3 | 3 | 8  |   |
| RS20_HUMAN   | RPS20        | P60866 | 40S ribosomal protein S20                                               | 19.3 | 17 | 4  | 2 | 6 | 7  | Y |
| RS26_HUMAN   | RPS26        | P62854 | 40S ribosomal protein S26                                               | 40   | 17 | 5  | 3 | 2 | 7  | Y |
| HNRDL_HUMAN  | HNRNPDL      | O14979 | Heterogeneous nuclear ribonucleoprotein D-like (hnRNP D-like) (hnRNP D) | 10   | 17 | 7  | 1 | 3 | 6  |   |
| NICA_HUMAN   | NCSTN        | Q92542 | Nicastrin                                                               | 7.05 | 17 | 7  | 4 | 1 | 6  | Y |
| SMD1_HUMAN   | SNRPD1       | P62314 | Small nuclear ribonucleoprotein Sm D1 (Sm-D1) (Sm-D autoantigen) (snRN  | 20.2 | 17 | 7  | 2 | 4 | 5  | Y |
| B4DLC0_HUMAN | PCBP2        | B4DLC0 | Poly(rC)-binding protein 2 (cDNA FLJ58476, highly similar to Poly(rC)-  | 14.3 | 17 | 5  | 3 | 5 | 4  | Y |
| B7Z7F0_HUMAN | B7Z7F0_HUMAN | B7Z7F0 | cDNA FLJ56420, highly similar to Aspartyl aminopeptidase (EC 3.4.11.21  | 7.71 | 17 | 5  | 2 | 7 | 3  |   |
| B2RAH7_HUMAN | B2RAH7_HUMAN | B2RAH7 | cDNA, FLJ94921, highly similar to Homo sapiens prolyl endopeptidase (P  | 6.48 | 17 | 7  | 1 | 6 | 3  |   |
| SUCB2_HUMAN  | SUCLG2       | Q96I99 | Succinyl-CoA ligase [GDP-forming] subunit beta, mitochondrial (EC 6.2.  | 12.5 | 17 | 10 | 1 | 3 | 3  | Y |

|              |              |        |                                                                        |      |    |    |   |   |   |   |
|--------------|--------------|--------|------------------------------------------------------------------------|------|----|----|---|---|---|---|
| CYBP_HUMAN   | CACYBP       | Q9HB71 | Calcyclin-binding protein (CacyBP) (hCacyBP) (S100A6-binding protein)  | 18.9 | 17 | 9  | 2 | 4 | 1 | Y |
| B4DF70_HUMAN | B4DF70_HUMAN | B4DF70 | cDNA FLJ60461, highly similar to Peroxiredoxin-2 (EC 1.11.1.15)        | 27.3 | 16 | 2  | 8 | 1 | 6 |   |
| F8VXU5_HUMAN | VPS29        | F8VXU5 | Vacuolar protein sorting-associated protein 29                         | 10.7 | 16 | 5  | 2 | 3 | 5 | Y |
| B5LY71_HUMAN | UMPS         | B5LY71 | Uridine monophosphate synthetase isoform I                             | 10   | 16 | 5  | 2 | 5 | 4 | Y |
| A8K8A4_HUMAN | A8K8A4_HUMAN | A8K8A4 | cDNA FLJ77640, highly similar to Homo sapiens copine II (CPNE2), mRNA  | 7.3  | 16 | 6  | 4 | 2 | 4 |   |
| B4DM33_HUMAN | B4DM33_HUMAN | B4DM33 | cDNA FLJ52068, highly similar to Microtubule-associated protein RP/EB  | 13.9 | 16 | 8  | 4 | 4 | 3 |   |
| Q6NZ61_HUMAN | RHEB         | Q6NZ61 | Ras homolog enriched in brain                                          | 33.2 | 16 | 9  | 2 | 2 | 3 | Y |
| VATE1_HUMAN  | ATP6V1E1     | P36543 | V-type proton ATPase subunit E 1 (V-ATPase subunit E 1) (V-ATPase 31 k | 11.1 | 16 | 6  | 6 | 1 | 3 | Y |
| PCBP1_HUMAN  | PCBP1        | Q15365 | Poly(rC)-binding protein 1 (Alpha-CP1) (Heterogeneous nuclear ribonucl | 15.2 | 16 | 4  | 3 | 7 | 2 | Y |
| GNPI1_HUMAN  | GNPDA1       | P46926 | Glucosamine-6-phosphate isomerase 1 (EC 3.5.99.6) (Glucosamine-6-phosp | 18.7 | 16 | 6  | 7 | 2 | 1 | Y |
| B7ZKT9_HUMAN | KIAA1033     | B7ZKT9 | KIAA1033 protein                                                       | 4.51 | 16 | 10 | 4 | 1 | 1 | Y |
| F5GX77_HUMAN | TRMT112      | F5GX77 | tRNA methyltransferase 112 homolog                                     | 26.4 | 15 | 4  | 1 | 2 | 8 | Y |
| AP1M1_HUMAN  | AP1M1        | Q9BXS5 | AP-1 complex subunit mu-1 (AP-mu chain family member mu1A) (Adapter-re | 5.67 | 15 | 4  | 1 | 5 | 6 | Y |
| J3K000_HUMAN | PEPD         | J3K000 | PEPD protein                                                           | 5.27 | 15 | 4  | 3 | 4 | 4 | Y |
| CPNS1_HUMAN  | CAPNS1       | P04632 | Calpain small subunit 1 (CSS1) (Calcium-activated neutral proteinase s | 10.8 | 15 | 7  | 3 | 2 | 4 | Y |
| PUR8_HUMAN   | ADSL         | P30566 | Adenylosuccinate lyase (ASL) (EC 4.3.2.2) (Adenylosuccinase) (ASase)   | 15.7 | 15 | 9  | 1 | 2 | 4 | Y |
| D3DNI3_HUMAN | PFN2         | D3DNI3 | Profilin (Fragment)                                                    | 10.6 | 15 | 4  | 2 | 6 | 3 | Y |
| MCA3_HUMAN   | EEF1E1       | O43324 | Eukaryotic translation elongation factor 1 epsilon-1 (Aminoacyl tRNA s | 12.1 | 15 | 4  | 3 | 5 | 3 | Y |
| ACPH_HUMAN   | APEH         | P13798 | Acylamino-acid-releasing enzyme (AARE) (EC 3.4.19.1) (Acyl-peptide hyd | 7.79 | 15 | 2  | 3 | 9 | 2 | Y |
| VP26A_HUMAN  | VPS26A       | O75436 | Vacuolar protein sorting-associated protein 26A (Vesicle protein sorti | 18.7 | 15 | 7  | 3 | 2 | 2 | Y |
| Q59GU6_HUMAN | Q59GU6_HUMAN | Q59GU6 | Sorting nexin 1 isoform a variant (Fragment)                           | 12.7 | 15 | 1  | 6 | 6 | 1 |   |
| A8K556_HUMAN | A8K556_HUMAN | A8K556 | cDNA FLJ78217                                                          | 5.6  | 15 | 2  | 8 | 4 | 1 |   |
| EXT2_HUMAN   | EXT2         | Q93063 | Exostosin-2 (EC 2.4.1.224) (EC 2.4.1.225) (Glucuronosyl-N-acetylglucos | 10.3 | 15 | 10 | 3 | 1 | 1 | Y |
| VAC14_HUMAN  | VAC14        | Q08AM6 | Protein VAC14 homolog (Tax1-binding protein 2)                         | 8.7  | 14 | 2  | 3 | 1 | 9 | Y |
| RL35A_HUMAN  | RPL35A       | P18077 | 60S ribosomal protein L35a (Cell growth-inhibiting gene 33 protein)    | 26.4 | 14 | 2  | 2 | 4 | 6 | Y |
| DHSO_HUMAN   | SORD         | Q00796 | Sorbitol dehydrogenase (EC 1.1.1.14) (L-idoitol 2-dehydrogenase)       | 9.24 | 14 | 3  | 2 | 3 | 6 | Y |



|              |              |        |                                                                          |      |    |   |   |   |   |   |
|--------------|--------------|--------|--------------------------------------------------------------------------|------|----|---|---|---|---|---|
| A8K7A4_HUMAN | A8K7A4_HUMAN | A8K7A4 | cDNA FLJ76904, highly similar to Homo sapiens methionine adenosyltrans   | 7.74 | 14 | 1 | 2 | 6 | 5 |   |
| B2R5I8_HUMAN | B2R5I8_HUMAN | B2R5I8 | cDNA, FLJ92490, highly similar to Homo sapiens RAB32, member RAS oncog   | 9.78 | 14 | 2 | 3 | 4 | 5 |   |
| B4DEK8_HUMAN | B4DEK8_HUMAN | B4DEK8 | cDNA FLJ53721, highly similar to Tetraspanin-3                           | 7.44 | 14 | 3 | 3 | 3 | 5 |   |
| UBP7_HUMAN   | USP7         | Q93009 | Ubiquitin carboxyl-terminal hydrolase 7 (EC 3.4.19.12) (Deubiquitinati   | 4.54 | 14 | 5 | 1 | 4 | 4 | Y |
| BZW2_HUMAN   | BZW2         | Q9Y6E2 | Basic leucine zipper and W2 domain-containing protein 2                  | 9.79 | 14 | 8 | 1 | 4 | 1 | Y |
| VASP_HUMAN   | VASP         | P50552 | Vasodilator-stimulated phosphoprotein (VASP)                             | 10   | 13 | 2 | 2 | 3 | 8 | Y |
| DNJA1_HUMAN  | DNJA1        | P31689 | DnaJ homolog subfamily A member 1 (DnaJ protein homolog 2) (HSDJ) (Hea   | 11.8 | 13 | 2 | 1 | 6 | 4 | Y |
| ARC1B_HUMAN  | ARPC1B       | O15143 | Actin-related protein 2/3 complex subunit 1B (Arp2/3 complex 41 kDa su   | 12.4 | 13 | 5 | 3 | 3 | 3 | Y |
| EF1B_HUMAN   | EEF1B2       | P24534 | Elongation factor 1-beta (EF-1-beta)                                     | 12.4 | 13 | 4 | 4 | 2 | 3 | Y |
| D6RER5_HUMAN | Sep-11       | D6RER5 | Septin-11                                                                | 5.09 | 13 | 4 | 4 | 2 | 3 | Y |
| B4E2J3_HUMAN | PRSS23       | B4E2J3 | Serine protease 23 (cDNA FLJ51190, highly similar to Serine protease 2   | 9.4  | 13 | 4 | 2 | 4 | 2 | Y |
| NPM_HUMAN    | NPM1         | P06748 | Nucleophosmin (NPM) (Nucleolar phosphoprotein B23) (Nucleolar protein    | 14.6 | 12 | 1 | 1 | 5 | 7 | Y |
| F2Z2E2_HUMAN | IQGAP3       | F2Z2E2 | Ras GTPase-activating-like protein IQGAP3                                | 3.78 | 12 | 3 | 1 | 2 | 6 | Y |
| CKAP5_HUMAN  | CKAP5        | Q14008 | Cytoskeleton-associated protein 5 (Colonic and hepatic tumor overexpre   | 3.54 | 12 | 3 | 5 | 1 | 4 | Y |
| CD151_HUMAN  | CD151        | P48509 | CD151 antigen (GP27) (Membrane glycoprotein SFA-1) (Platelet-endotheli   | 7.11 | 12 | 3 | 5 | 1 | 3 | Y |
| AL3B1_HUMAN  | ALDH3B1      | P43353 | Aldehyde dehydrogenase family 3 member B1 (EC 1.2.1.5) (Aldehyde dehyd   | 11.1 | 12 | 2 | 2 | 6 | 2 | Y |
| D6RAX7_HUMAN | COPS4        | D6RAX7 | COP9 signalosome complex subunit 4                                       | 11.2 | 12 | 3 | 2 | 6 | 1 | Y |
| PA1B3_HUMAN  | PAFAH1B3     | Q15102 | Platelet-activating factor acetylhydrolase IB subunit gamma (EC 3.1.1.1. | 11.3 | 11 | 3 | 2 | 2 | 4 | Y |
| IMA5_HUMAN   | KPNA1        | P52294 | Importin subunit alpha-5 (Karyopherin subunit alpha-1) (Nucleoprotein    | 5.95 | 11 | 4 | 2 | 1 | 4 | Y |
| ERF1_HUMAN   | ETF1         | P62495 | Eukaryotic peptide chain release factor subunit 1 (Eukaryotic release    | 5.26 | 11 | 4 | 1 | 3 | 3 | Y |
| B4E1G6_HUMAN | GALK1        | B4E1G6 | Galactokinase (Galactokinase 1) (cDNA FLJ56840, highly similar to Gala   | 9.95 | 11 | 2 | 1 | 6 | 2 | Y |
| E9PFN5_HUMAN | GSTK1        | E9PFN5 | Glutathione S-transferase kappa 1                                        | 15.8 | 11 | 5 | 1 | 4 | 2 | Y |
| B4DLB8_HUMAN | B4DLB8_HUMAN | B4DLB8 | cDNA FLJ52205, highly similar to Beta-1,4-galactosyltransferase 1 (EC    | 9.3  | 11 | 6 | 1 | 3 | 2 |   |
| LEG3_HUMAN   | LGALS3       | P17931 | Galectin-3 (Gal-3) (35 kDa lectin) (Carbohydrate-binding protein 35) (   | 16   | 11 | 2 | 5 | 2 | 2 | Y |
| SMD3_HUMAN   | SNRPD3       | P62318 | Small nuclear ribonucleoprotein Sm D3 (Sm-D3) (snRNP core protein D3)    | 15.1 | 10 | 3 | 1 | 1 | 5 | Y |
| B2RDT8_HUMAN | B2RDT8_HUMAN | B2RDT8 | cDNA, FLJ96764, highly similar to Homo sapiens sorting nexin 8 (SNX8).   | 11.8 | 10 | 4 | 2 | 1 | 3 |   |

|              |              |        |                                                                        |      |    |   |   |   |   |   |
|--------------|--------------|--------|------------------------------------------------------------------------|------|----|---|---|---|---|---|
| B2R679_HUMAN | B2R679_HUMAN | B2R679 | cDNA, FLJ92825, highly similar to Homo sapiens SAR1a gene homolog 1 (S | 11.6 | 10 | 3 | 3 | 2 | 2 |   |
| J3QK90_HUMAN | NSFL1C       | J3QK90 | NSFL1 cofactor p47                                                     | 10.2 | 10 | 5 | 2 | 1 | 2 | Y |
| CHIP_HUMAN   | STUB1        | Q9UNE7 | E3 ubiquitin-protein ligase CHIP (EC 6.3.2.-) (Antigen NY-CO-7) (CLL-a | 7.59 | 9  | 3 | 1 | 1 | 4 | Y |
| ETUD1_HUMAN  | EFTUD1       | Q7Z2Z2 | Elongation factor Tu GTP-binding domain-containing protein 1 (Elongati | 1.43 | 9  | 2 | 1 | 3 | 3 | Y |
| ASNA_HUMAN   | ASNA1        | O43681 | ATPase ASNA1 (EC 3.6.-.-) (Arsenical pump-driving ATPase) (Arsenite-st | 2.87 | 9  | 2 | 3 | 2 | 2 | Y |
| B4DG42_HUMAN | B4DG42_HUMAN | B4DG42 | cDNA FLJ53753, highly similar to Myeloid-associated differentiation ma | 9.82 | 9  | 2 | 4 | 1 | 2 |   |
| DEST_HUMAN   | DSTN         | P60981 | Dextrin (Actin-depolymerizing factor) (ADF)                            | 16.4 | 9  | 4 | 2 | 1 | 2 | Y |
| 6PGL_HUMAN   | PGLS         | O95336 | 6-phosphogluconolactonase (6PGL) (EC 3.1.1.31)                         | 17.1 | 9  | 4 | 2 | 1 | 2 | Y |
| NEDD4_HUMAN  | NEDD4        | P46934 | E3 ubiquitin-protein ligase NEDD4 (EC 6.3.2.-) (Cell proliferation-ind | 2.73 | 9  | 2 | 1 | 5 | 1 | Y |
| B7Z2B0_HUMAN | B7Z2B0_HUMAN | B7Z2B0 | cDNA FLJ53470, highly similar to Calcium/calmodulin-dependent protein  | 6.75 | 9  | 3 | 3 | 2 | 1 |   |
| M0QXB4_HUMAN | COPE         | M0QXB4 | Coatomer protein complex, subunit epsilon, isoform CRA_g (Coatomer sub | 7.55 | 9  | 6 | 1 | 1 | 1 | Y |
| C8C504_HUMAN | HBB          | C8C504 | Beta-globin                                                            | 26.5 | 8  | 1 | 1 | 5 | 1 | Y |
| PSB8_HUMAN   | PSMB8        | P28062 | Proteasome subunit beta type-8 (EC 3.4.25.1) (Low molecular mass prote | 13.4 | 8  | 2 | 2 | 3 | 1 | Y |
| LRC59_HUMAN  | LRRC59       | Q96AG4 | Leucine-rich repeat-containing protein 59 (Ribosome-binding protein p3 | 8.14 | 8  | 3 | 1 | 3 | 1 | Y |
| CD47_HUMAN   | CD47         | Q08722 | Leukocyte surface antigen CD47 (Antigenic surface determinant protein  | 5.26 | 8  | 4 | 2 | 1 | 1 | Y |
| B2R6H7_HUMAN | B2R6H7_HUMAN | B2R6H7 | cDNA, FLJ92955, highly similar to Homo sapiens transportin-SR (TRN-SR) | 3.47 | 7  | 2 | 1 | 1 | 3 |   |
| HEXB_HUMAN   | HEXB         | P07686 | Beta-hexosaminidase subunit beta (EC 3.2.1.52) (Beta-N-acetylhexosamin | 4.5  | 7  | 2 | 2 | 2 | 1 | Y |
| B4E1E2_HUMAN | B4E1E2_HUMAN | B4E1E2 | cDNA FLJ61530, highly similar to Hepatocyte growth factor-regulated ty | 3.33 | 7  | 2 | 2 | 2 | 1 |   |
| B3KM36_HUMAN | B3KM36_HUMAN | B3KM36 | cDNA FLJ10153 fis, clone HEMBA1003417, highly similar to BAG family mo | 15.6 | 7  | 2 | 3 | 1 | 1 |   |
| Q59FB9_HUMAN | Q59FB9_HUMAN | Q59FB9 | Toll interacting protein variant (Fragment)                            | 7.67 | 7  | 4 | 2 | 1 | 1 |   |
| B7Z561_HUMAN | B7Z561_HUMAN | B7Z561 | cDNA FLJ53154, highly similar to Neutral amino acid transporter A      | 5.31 | 6  | 1 | 3 | 2 | 3 |   |
| A8K923_HUMAN | A8K923_HUMAN | A8K923 | cDNA FLJ78690, highly similar to Homo sapiens protein phosphatase 4, r | 2.36 | 6  | 1 | 1 | 2 | 2 |   |
| A4D0R2_HUMAN | SYPL         | A4D0R2 | Synaptophysin-like 1, isoform CRA_b (Synaptophysin-like protein)       | 4.56 | 6  | 2 | 3 | 2 | 1 |   |
| ARL3_HUMAN   | ARL3         | P36405 | ADP-ribosylation factor-like protein 3                                 | 6.04 | 5  | 2 | 1 | 2 | 1 | Y |
| C9JG87_HUMAN | MRPL39       | C9JG87 | 39S ribosomal protein L39, mitochondrial (Fragment)                    | 8.75 | 4  | 1 | 1 | 1 | 2 | Y |

**Table S2. Relative quantification of selected exosome proteins involved in biogenesis, sorting/trafficking/release, and recognition/uptake by label-free spectral counting.**

| Biogenesis                | Gene Name | Protein Accession | Protein Description                                                    | SpC Combined (4 cell lines) | Vesiclepedia |
|---------------------------|-----------|-------------------|------------------------------------------------------------------------|-----------------------------|--------------|
| <b>Exosome Biogenesis</b> |           |                   |                                                                        |                             |              |
| <i>ESCRT-associated</i>   | CHMP4B    | Q9H444            | Charged multivesicular body protein 4b (Chromatin-modifying protein 4b | 4                           | Y            |
|                           | CHMP6     | Q96FZ7            | Charged multivesicular body protein 6 (Chromatin-modifying protein 6)  | 6                           | Y            |
|                           | FAM129A   | Q9BZQ8            | Protein Niban (Cell growth-inhibiting gene 39 protein) (Protein FAM129 | 29                          | Y            |
|                           | FAM129B   | Q96TA1            | Niban-like protein 1 (Meg-3) (Melanoma invasion by ERK) (MINERVA) (Pro | 94                          | Y            |
|                           | FAM49B    | Q9NUQ9            | Protein FAM49B (L1)                                                    | 52                          | Y            |
|                           | FAM98B    | Q52LJ0            | Protein FAM98B                                                         | 2                           |              |
|                           | PDCD6IP   | Q8WUM4            | Programmed cell death 6-interacting protein (PDCD6-interacting protein | 273                         | Y            |
|                           | TSG101    | Q99816            | Tumor susceptibility gene 101 protein (ESCRT-I complex subunit TSG101) | 50                          | Y            |
|                           | VPS16     | Q9H269            | Vacuolar protein sorting-associated protein 16 homolog (hVPS16)        | 3                           |              |
|                           | VPS26A    | O75436            | Vacuolar protein sorting-associated protein 26A (Vesicle protein sorti | 15                          | Y            |
|                           | VPS29     | F8VXU5            | Vacuolar protein sorting-associated protein 29                         | 16                          | Y            |
|                           | VPS35     | Q96QK1            | Vacuolar protein sorting-associated protein 35 (hVPS35) (Maternal-embr | 121                         | Y            |
|                           | VPS37B    | F5H4M0            | Vacuolar protein sorting-associated protein 37B (Fragment)             | 7                           | Y            |
|                           | VPS45     | Q9NRW7            | Vacuolar protein sorting-associated protein 45 (h-VPS45) (hVps45)      | 4                           | Y            |
|                           | VPS4A     | Q9UN37            | Vacuolar protein sorting-associated protein 4A (EC 3.6.4.6) (Protein S | 16                          | Y            |
|                           | VPS51     | Q9UID3            | Vacuolar protein sorting-associated protein 51 homolog (Another new ge | 4                           |              |
|                           | VTA1      | Q9NP79            | Vacuolar protein sorting-associated protein VTA1 homolog (Dopamine-res | 3                           | Y            |
| <i>Tetraspanin</i>        | CD151     | P48509            | CD151 antigen (GP27) (Membrane glycoprotein SFA-1) (Platelet-endotheli | 12                          | Y            |
|                           | CD63      | C9JV86            | CD63 antigen                                                           | 46                          | Y            |
|                           | CD81      | E9PIF1            | CD81 antigen                                                           | 18                          | Y            |
|                           | CD82      | P27701            | CD82 antigen (C33 antigen) (IA4) (Inducible membrane protein R2) (Meta | 50                          | Y            |
|                           | CD9       | A6NNI4            | CD9 antigen                                                            | 23                          | Y            |
|                           | CLDN2     | P57739            | Claudin-2 (SP82)                                                       | 12                          |              |
|                           | TMEM132A  | Q24JP5            | Transmembrane protein 132A (HSPA5-binding protein 1)                   | 9                           |              |
|                           | TMEM189   | G3V2F7            | HCG2044781 (Protein TMEM189-UBE2V1) (Transmembrane protein 189)        | 7                           |              |
|                           | TMEM2     | Q9UHN6            | Transmembrane protein 2                                                | 6                           | Y            |
|                           | TMEM43    | Q9BTV4            | Transmembrane protein 43 (Protein LUMA)                                | 2                           |              |
|                           | TSPAN15   | H7C285            | Tetraspanin-15 (Fragment)                                              | 3                           | Y            |
|                           | TSPAN4    | J3KQ42            | Tetraspanin-4                                                          | 5                           | Y            |

|                                          |              |                                       |                                                                         |    |   |
|------------------------------------------|--------------|---------------------------------------|-------------------------------------------------------------------------|----|---|
|                                          | TSPAN9       | B5MD23                                | Tetraspanin-9                                                           | 6  | Y |
| <b>Sorting/Trafficking &amp; Release</b> |              |                                       |                                                                         |    |   |
| <i>GTPase</i>                            | RAB10        | P61026                                | Ras-related protein Rab-10                                              | 63 | Y |
|                                          | RAB11B       | Q15907                                | Ras-related protein Rab-11B (GTP-binding protein YPT3)                  | 50 | Y |
|                                          | RAB11FIP1    | Q6WKZ4                                | Rab11 family-interacting protein 1 (Rab11-FIP1) (Rab-coupling protein)  | 3  |   |
|                                          | RAB11FIP5    | Q9BXF6                                | Rab11 family-interacting protein 5 (Rab11-FIP5) (Gamma-SNAP-associated) | 7  |   |
|                                          | RAB13        | Q504R6                                | RAB13 protein (Fragment)                                                | 31 | Y |
|                                          | RAB14        | P61106                                | Ras-related protein Rab-14                                              | 57 | Y |
|                                          | RAB18        | Q9NP72                                | Ras-related protein Rab-18                                              | 6  | Y |
|                                          | RAB1A        | P62820                                | Ras-related protein Rab-1A (YPT1-related protein)                       | 75 | Y |
|                                          | RAB1B        | Q6FIG4                                | RAB1B protein                                                           | 64 | Y |
|                                          | RAB21        | Q9UL25                                | Ras-related protein Rab-21                                              | 20 | Y |
|                                          | RAB23        | Q9ULC3                                | Ras-related protein Rab-23                                              | 16 |   |
|                                          | RAB27A       | H3BN55                                | Ras-related protein Rab-27A (Fragment)                                  | 10 | Y |
|                                          | RAB27B       | O00194                                | Ras-related protein Rab-27B (C25KG)                                     | 10 | Y |
|                                          | RAB2A        | P61019                                | Ras-related protein Rab-2A                                              | 73 | Y |
|                                          | RAB31        | Q13636                                | Ras-related protein Rab-31 (Ras-related protein Rab-22B)                | 4  | Y |
|                                          | RAB34        | A8MYQ9                                | Ras-related protein Rab-34, isoform NARR                                | 16 | Y |
|                                          | RAB35        | F5H157                                | Ras-related protein Rab-35 (Fragment)                                   | 45 | Y |
|                                          | RAB3B        | P20337                                | Ras-related protein Rab-3B                                              | 17 | Y |
|                                          | RAB5A        | B4DJA5                                | Ras-related protein Rab-5A (cDNA FLJ51867, highly similar to Ras-relat  | 36 | Y |
|                                          | RAB5B        | P61020                                | Ras-related protein Rab-5B                                              | 29 | Y |
|                                          | RAB5C        | P51148                                | Ras-related protein Rab-5C (L1880) (RAB5L)                              | 55 | Y |
|                                          | RAB6A        | Q6FGX3                                | RAB6A protein                                                           | 22 | Y |
|                                          | RAB7A        | P51149                                | Ras-related protein Rab-7a                                              | 80 | Y |
|                                          | RAB8A        | P61006                                | Ras-related protein Rab-8A (Oncogene c-mel)                             | 75 | Y |
| RAB8B                                    | H0YNE9       | Ras-related protein Rab-8B (Fragment) | 67                                                                      | Y  |   |
| <i>Sorting</i>                           | ARCN1        | B0YIW6                                | Archain 1, isoform CRA_a (Coatomer subunit delta) (Coatomer subunit de  | 20 | Y |
|                                          | ARF1         | P84077                                | ADP-ribosylation factor 1                                               | 47 | Y |
|                                          | ARF4         | P18085                                | ADP-ribosylation factor 4                                               | 32 | Y |
|                                          | ARF6         | P62330                                | ADP-ribosylation factor 6                                               | 23 | Y |
|                                          | ARFIP1       | P53367                                | Arfaptin-1 (ADP-ribosylation factor-interacting protein 1)              | 3  | Y |
|                                          | B2RAU5_HUMAN | B2RAU5                                | Sorting nexin                                                           | 5  |   |
|                                          | B4DDM5_HUMAN | B4DDM5                                | cDNA FLJ53298, highly similar to Peroxisomal multifunctional enzyme ty  | 13 |   |
|                                          | B4DJW8_HUMAN | B4DJW8                                | cDNA FLJ55697, highly similar to Protein transport protein Sec23B       | 10 |   |
|                                          | B4DSN3_HUMAN | B4DSN3                                | cDNA FLJ60345, highly similar to Protein transport protein Sec24C       | 22 |   |
|                                          | CAV1         | Q03135                                | Caveolin-1                                                              | 13 | Y |

|                    |              |        |                                                                         |     |   |
|--------------------|--------------|--------|-------------------------------------------------------------------------|-----|---|
|                    | CLTC         | Q00610 | Clathrin heavy chain 1 (Clathrin heavy chain on chromosome 17) (CLH-17) | 473 | Y |
|                    | COPA         | P53621 | Coatomer subunit alpha (Alpha-coat protein) (Alpha-COP) (HEP-COP) (HEP) | 143 | Y |
|                    | COPB1        | P53618 | Coatomer subunit beta (Beta-coat protein) (Beta-COP)                    | 112 | Y |
|                    | COPB2        | B4DZI8 | Coatomer protein complex, subunit beta 2 (Beta prime), isoform CRA_b (  | 37  | Y |
|                    | COPE         | M0QXB4 | Coatomer protein complex, subunit epsilon, isoform CRA_g (Coatomer sub  | 9   | Y |
|                    | COPG1        | Q9Y678 | Coatomer subunit gamma-1 (Gamma-1-coat protein) (Gamma-1-COP)           | 69  |   |
|                    | COPS4        | D6RAX7 | COP9 signalosome complex subunit 4                                      | 12  | Y |
|                    | COPS7A       | Q9UBW8 | COP9 signalosome complex subunit 7a (SGN7a) (Signalosome subunit 7a) (  | 4   |   |
|                    | EEA1         | Q15075 | Early endosome antigen 1 (Endosome-associated protein p162) (Zinc fing  | 6   | Y |
|                    | FLOT1        | O75955 | Flotillin-1                                                             | 39  | Y |
|                    | FLOT2        | Q14254 | Flotillin-2 (Epidermal surface antigen) (ESA) (Membrane component chro  | 27  | Y |
|                    | IGFBP2       | P18065 | Insulin-like growth factor-binding protein 2 (IBP-2) (IGF-binding prot  | 6   |   |
|                    | LAP3         | P28838 | Cytosol aminopeptidase (EC 3.4.11.1) (Leucine aminopeptidase 3) (LAP-3  | 68  | Y |
|                    | PARVA        | J3KNQ4 | Alpha-parvin (Parvin, alpha, isoform CRA_c)                             | 10  |   |
|                    | PSMD8        | K7EJC1 | 26S proteasome non-ATPase regulatory subunit 8                          | 9   | Y |
|                    | Q53GW1_HUMAN | Q53GW1 | Vesicle transport-related protein isoform a variant (Fragment)          | 19  |   |
|                    | Q59GU6_HUMAN | Q59GU6 | Sorting nexin 1 isoform a variant (Fragment)                            | 15  |   |
|                    | RAC1         | A4D2P0 | Ras-related C3 botulinum toxin substrate 1 (Rho family, small GTP bind  | 57  | Y |
|                    | RAC2         | P15153 | Ras-related C3 botulinum toxin substrate 2 (GX) (Small G protein) (p21  | 16  | Y |
|                    | SEC23A       | F5H365 | Protein transport protein Sec23A                                        | 15  | Y |
|                    | SNRNP200     | O75643 | U5 small nuclear ribonucleoprotein 200 kDa helicase (EC 3.6.4.13) (Act  | 81  |   |
|                    | SNX12        | Q3SYF1 | Sorting nexin 12 (Sorting nexin 12, isoform CRA_a) (cDNA, FLJ93438, Ho  | 2   | Y |
|                    | SNX18        | Q96RF0 | Sorting nexin-18 (SH3 and PX domain-containing protein 3B) (Sorting ne  | 2   | Y |
|                    | SNX5         | Q9Y5X3 | Sorting nexin-5                                                         | 12  |   |
|                    | STX3         | F8W9Y0 | Syntaxin-3                                                              | 10  | Y |
|                    | TF           | Q06AH7 | Transferrin                                                             | 202 | Y |
|                    | YKT6         | B5BU81 | YKT6 v-SNARE protein                                                    | 10  |   |
| <i>Trafficking</i> | DYNC1H1      | Q14204 | Cytoplasmic dynein 1 heavy chain 1 (Cytoplasmic dynein heavy chain 1)   | 750 | Y |
|                    | DYNC1LI1     | Q9Y6G9 | Cytoplasmic dynein 1 light intermediate chain 1 (LIC1) (Dynein light c  | 27  | Y |
|                    | DYNC1LI2     | B4DZP4 | Cytoplasmic dynein 1 light intermediate chain 2 (cDNA FLJ52924, highly  | 18  |   |
|                    | DYNLL2       | Q96FJ2 | Dynein light chain 2, cytoplasmic (8 kDa dynein light chain b) (DLC8b)  | 5   |   |
|                    | DYNLRB1      | B4DFR2 | Dynein light chain roadblock-type 1 (cDNA FLJ59194, moderately similar  | 3   |   |
|                    | HIST1H1B     | P16401 | Histone H1.5 (Histone H1a) (Histone H1b) (Histone H1s-3)                | 22  | Y |
|                    | ITPA         | Q9BY32 | Inosine triphosphate pyrophosphatase (ITPase) (Inosine triphosphatase)  | 14  | Y |
|                    | KIF11        | P52732 | Kinesin-like protein KIF11 (Kinesin-like protein 1) (Kinesin-like spin  | 2   |   |
|                    | KIF13B       | Q9NQT8 | Kinesin-like protein KIF13B (Kinesin-like protein GAKIN)                | 4   |   |

|                                 |        |        |                                                                            |                                                                        |    |
|---------------------------------|--------|--------|----------------------------------------------------------------------------|------------------------------------------------------------------------|----|
|                                 | KIF23  | Q02241 | Kinesin-like protein KIF23 (Kinesin-like protein 5) (Mitotic kinesin-1     | 37                                                                     |    |
|                                 | KIF5B  | D3DRX6 | Kinesin family member 5B, isoform CRA_a                                    | 57                                                                     | Y  |
|                                 | KLC1   | G3V5R9 | Kinesin light chain 1                                                      | 11                                                                     |    |
|                                 | LDHA   | P00338 | L-lactate dehydrogenase A chain (LDH-A) (EC 1.1.1.27) (Cell proliferat     | 134                                                                    | Y  |
|                                 | RAC1   | A4D2P0 | Ras-related C3 botulinum toxin substrate 1 (Rho family, small GTP bind     | 57                                                                     | Y  |
|                                 | SKI2W  | O76046 | Putative RNA helicase Ski2w                                                | 12                                                                     |    |
| <i>Release</i>                  | DNM1   | Q05193 | Dynamin-1 (EC 3.6.5.5)                                                     | 27                                                                     | Y  |
|                                 | DNM2   | P50570 | Dynamin-2 (EC 3.6.5.5)                                                     | 32                                                                     | Y  |
|                                 | ERP29  | P30040 | Endoplasmic reticulum resident protein 29 (Erp29) (Endoplasmic reticul     | 11                                                                     |    |
|                                 | ESYT1  | Q9BSJ8 | Extended synaptotagmin-1 (E-Syt1) (Membrane-bound C2 domain-<br>containing | 22                                                                     |    |
|                                 | ESYT2  | H7BXI1 | Extended synaptotagmin-2 (Fragment)                                        | 4                                                                      |    |
|                                 | IMPA1  | P29218 | Inositol monophosphatase 1 (IMP 1) (IMPase 1) (EC 3.1.3.25) (Inositol-     | 11                                                                     |    |
|                                 | LAMP2  | B4E2S7 | Lysosome-associated membrane glycoprotein 2 (cDNA FLJ58780, highly<br>sim  | 10                                                                     | Y  |
|                                 | RNPS1  | H3BV80 | RNA-binding protein with serine-rich domain 1                              | 6                                                                      |    |
|                                 | SEC22B | O75396 | Vesicle-trafficking protein SEC22b (ER-Golgi SNARE of 24 kDa) (ERS-<br>24) | 23                                                                     | Y  |
|                                 | SNAP23 | O00161 | Synaptosomal-associated protein 23 (SNAP-23) (Vesicle-membrane fusion      | 23                                                                     | Y  |
|                                 | STX3   | F8W9Y0 | Syntaxin-3                                                                 | 10                                                                     | Y  |
|                                 | STX4   | Q12846 | Syntaxin-4 (Renal carcinoma antigen NY-REN-31)                             | 28                                                                     | Y  |
|                                 | STX7   | O15400 | Syntaxin-7                                                                 | 3                                                                      | Y  |
|                                 | SYNGR2 | Q3KQZ2 | Synaptogyrin                                                               | 2                                                                      | Y  |
|                                 | SYPL   | A4D0R2 | Synaptophysin-like 1, isoform CRA_b (Synaptophysin-like protein)           | 6                                                                      | Y  |
|                                 |        | UCHL1  | P09936                                                                     | Ubiquitin carboxyl-terminal hydrolase isozyme L1 (UCH-L1) (EC 3.4.19.1 | 36 |
|                                 | VAMP3  | Q9BRV4 | Vesicle-associated membrane protein 3 (Cellubrevin)                        | 16                                                                     | Y  |
|                                 | VAT1   | Q99536 | Synaptic vesicle membrane protein VAT-1 homolog (EC 1.-.-.-)               | 85                                                                     | Y  |
| <b>Recognition &amp; Uptake</b> |        |        |                                                                            |                                                                        |    |
| <i>Antigen-Presentation</i>     | HLA-A  | E9ABI2 | MHC class I antigen (Fragment)                                             | 104                                                                    | Y  |
|                                 | HLA-B  | Q0ZAX5 | MHC class I antigen (Fragment)                                             | 87                                                                     | Y  |
| <i>Other</i>                    | CD44   | E7EPC6 | CD44 antigen                                                               | 97                                                                     | Y  |
|                                 | CD55   | B1AP13 | Complement decay-accelerating factor                                       | 2                                                                      | Y  |
|                                 | CD58   | B1AMW1 | CD58 antigen, (Lymphocyte function-associated antigen 3), isoform CRA_     | 2                                                                      | Y  |
|                                 | CD59   | P13987 | CD59 glycoprotein (1F5 antigen) (20 kDa homologous restriction factor)     | 3                                                                      | Y  |
|                                 | PTGFRN | Q9P2B2 | Prostaglandin F2 receptor negative regulator (CD9 partner 1) (CD9P-1)      | 54                                                                     | Y  |
| <i>Adaptor protein complex</i>  | AP1B1  | Q10567 | AP-1 complex subunit beta-1 (Adapter-related protein complex 1 subunit     | 65                                                                     | Y  |
|                                 | AP1G1  | O43747 | AP-1 complex subunit gamma-1 (Adapter-related protein complex 1 subuni     | 29                                                                     | Y  |
|                                 | AP1M1  | Q9BXS5 | AP-1 complex subunit mu-1 (AP-mu chain family member mu1A)<br>(Adapter-re  | 15                                                                     | Y  |

|                    |              |        |                                                                            |    |   |
|--------------------|--------------|--------|----------------------------------------------------------------------------|----|---|
|                    | AP1S1        | P61966 | AP-1 complex subunit sigma-1A (Adapter-related protein complex 1 subun     | 2  | Y |
|                    | AP2A1        | O95782 | AP-2 complex subunit alpha-1 (100 kDa coated vesicle protein A) (Adapt     | 94 | Y |
|                    | AP2A2        | O94973 | AP-2 complex subunit alpha-2 (100 kDa coated vesicle protein C) (Adapt     | 75 | Y |
|                    | AP2M1        | Q96CW1 | AP-2 complex subunit mu (AP-2 mu chain) (Adapter-related protein compl     | 18 | Y |
|                    | AP3D1        | O14617 | AP-3 complex subunit delta-1 (AP-3 complex subunit delta) (Adapter-rel     | 17 | Y |
|                    | AP3M1        | Q9Y2T2 | AP-3 complex subunit mu-1 (AP-3 adapter complex mu3A subunit)<br>(Adapter  | 2  |   |
|                    | AP3S1        | Q92572 | AP-3 complex subunit sigma-1 (AP-3 complex subunit sigma-3A)<br>(Adapter-  | 5  |   |
| <i>Endocytosis</i> | A8K9V7_HUMAN | A8K9V7 | cDNA FLJ77207                                                              | 75 |   |
|                    | AK1          | P00568 | Adenylate kinase isoenzyme 1 (AK 1) (EC 2.7.4.3) (EC 2.7.4.6) (ATP-<br>AMP | 9  | Y |
|                    | ERLIN2       | E5RHW4 | Erlin-2 (Fragment)                                                         | 3  |   |
|                    | EXT1         | Q16394 | Exostosin-1 (EC 2.4.1.224) (EC 2.4.1.225) (Glucuronosyl-N-acetylglucos     | 10 |   |
|                    | GLB1         | P16278 | Beta-galactosidase (EC 3.2.1.23) (Acid beta-galactosidase) (Lactase) (     | 17 | Y |
|                    | GNB2L1       | P63244 | Guanine nucleotide-binding protein subunit beta-2-like 1 (Cell prolife     | 80 | Y |
|                    | PLIN3        | O60664 | Perilipin-3 (47 kDa mannose 6-phosphate receptor-binding protein) (47      | 19 |   |
|                    | PSMD8        | K7EJC1 | 26S proteasome non-ATPase regulatory subunit 8                             | 9  | Y |
|                    | Q59FU8_HUMAN | Q59FU8 | Tumor necrosis factor receptor superfamily, member 6 isoform 1 variant     | 4  |   |
|                    | SCRN1        | Q12765 | Secernin-1                                                                 | 17 |   |
|                    | SF3A1        | Q15459 | Splicing factor 3A subunit 1 (SF3a120) (Spliceosome-associated protein     | 6  |   |
|                    | SNRNP200     | O75643 | U5 small nuclear ribonucleoprotein 200 kDa helicase (EC 3.6.4.13) (Act     | 81 |   |

**Table S3. Comparison of proteins identified in mesothelioma-derived exosomes from Hegmans et al 2004.**

| Gene Name    | Protein Accession | Protein Description                          | Identified in current study (Supp Dataset) | Identified in current study - 631 common exosome list (Table S1) |
|--------------|-------------------|----------------------------------------------|--------------------------------------------|------------------------------------------------------------------|
| ACTN4        | O43707            | Alpha-actinin-4                              | Y                                          | Y                                                                |
| ANXA1        | P04083            | Annexin A1                                   | Y                                          | Y                                                                |
| ANXA2        | P07355            | Annexin A2                                   | Y                                          | Y                                                                |
| ANXA5        | P08758            | Annexin A5                                   | Y                                          | Y                                                                |
| ANXA6        | A6NN80            | Annexin A6                                   | Y                                          | Y                                                                |
| B2R6J2_HUMAN | B2R6J2            | Villin 2                                     | Y                                          | Y                                                                |
| B3KTA3_HUMAN | B3KTA3            | Fascin                                       | Y                                          | Y                                                                |
| CNP          | P09543            | 2',3'-cyclic-nucleotide 3'-phosphodiesterase | Y                                          | Y                                                                |
| DSP          | P15924            | Desmoplakin                                  | Y                                          |                                                                  |
| ENO1         | P06733            | Alpha-enolase                                | Y                                          | Y                                                                |
| FN1          | P02751            | Fibronectin                                  | Y                                          |                                                                  |
| GAPDH        | P04406            | Glyceraldehyde-3-phosphate dehydrogenase     | Y                                          | Y                                                                |
| HLA-A        | E9ABI2            | MHC class I antigen (Fragment)               | Y                                          |                                                                  |
| HLA-B        | Q0ZAX5            | MHC class I antigen (Fragment)               | Y                                          |                                                                  |
| HSP90AA1     | P07900            | Heat shock protein HSP 90-alpha              | Y                                          | Y                                                                |
| ITGA3        | P26006            | Integrin alpha-3                             | Y                                          | Y                                                                |
| MSN          | P26038            | Moesin                                       | Y                                          | Y                                                                |
| PKM          | P14618            | Pyruvate kinase PKM                          | Y                                          | Y                                                                |
| TUBB         | P07437            | Tubulin beta chain                           | Y                                          | Y                                                                |



**Table S4. Mesothelioma-specific exosome protein cancer signature.**

| Gene symbol  | Gene Name | Protein Accession | Protein Description                                                     | Coverage (%) | SpC Combined (4 cell lines) | JO38 SpC | JU77 SpC | LO68 SpC | OLD1612 SpC | Vesiclepedia | Known_cancer-Exos* |
|--------------|-----------|-------------------|-------------------------------------------------------------------------|--------------|-----------------------------|----------|----------|----------|-------------|--------------|--------------------|
| KPYM_HUMAN   | PKM       | P14618            | Pyruvate kinase PKM (EC 2.7.1.40) (Cytosolic thyroid hormone-binding p  | 61.2         | 824                         | 114      | 120      | 192      | 414         | Y            | Y                  |
| ANXA2_HUMAN  | ANXA2     | P07355            | Annexin A2 (Annexin II) (Annexin-2) (Calpactin I heavy chain) (Calpact  | 74.9         | 643                         | 172      | 199      | 163      | 116         | Y            | Y                  |
| ACTB_HUMAN   | ACTB      | P60709            | Actin, cytoplasmic 1 (Beta-actin) [Cleaved into: Actin, cytoplasmic 1,  | 49.1         | 640                         | 173      | 121      | 133      | 223         | Y            | Y                  |
| B7ZLE5_HUMAN | FN1       | P02751            | Fibronectin                                                             | 27.8         | 580                         |          | 71       | 212      | 270         | Y            | Y                  |
| HSP7C_HUMAN  | HSPA8     | P11142            | Heat shock cognate 71 kDa protein (Heat shock 70 kDa protein 8)         | 42.7         | 529                         | 143      | 126      | 134      | 124         | Y            | Y                  |
| HS90B_HUMAN  | HSP90AB1  | P08238            | Heat shock protein HSP 90-beta (HSP 90) (Heat shock 84 kDa) (HSP 84) (  | 40.6         | 498                         | 141      | 102      | 136      | 121         | Y            | Y                  |
| HS90A_HUMAN  | HSP90AA1  | P07900            | Heat shock protein HSP 90-alpha (Heat shock 86 kDa) (HSP 86) (HSP86) (  | 39.9         | 489                         | 125      | 118      | 118      | 129         | Y            | Y                  |
| TBB4A_HUMAN  | TUBB4A    | P04350            | Tubulin beta-4A chain (Tubulin 5 beta) (Tubulin beta-4 chain)           | 44.4         | 470                         | 110      | 62       | 99       | 205         | Y            | Y                  |
| ACTN4_HUMAN  | ACTN4     | O43707            | Alpha-actinin-4 (F-actin cross-linking protein) (Non-muscle alpha-acti  | 48.2         | 406                         | 108      | 96       | 124      | 83          | Y            | Y                  |
| MOES_HUMAN   | MSN       | P26038            | Moesin (Membrane-organizing extension spike protein)                    | 53.6         | 405                         | 149      | 94       | 39       | 128         | Y            | Y                  |
| MYH9_HUMAN   | MYH9      | P35579            | Myosin-9 (Cellular myosin heavy chain, type A) (Myosin heavy chain 9)   | 35.3         | 397                         | 194      | 63       | 28       | 118         | Y            | Y                  |
| ANXA5_HUMAN  | ANXA5     | P08758            | Annexin A5 (Anchoring CII) (Annexin V) (Annexin-5) (Calphobindin I) (CB | 66.3         | 351                         | 100      | 90       | 96       | 71          | Y            | Y                  |
| HSP71_HUMAN  | HSPA1A    | P08107            | Heat shock 70 kDa protein 1A/1B (Heat shock 70 kDa protein 1/2) (HSP70  | 39.6         | 327                         | 62       | 53       | 113      | 98          | Y            | Y                  |

|              |       |        |                                                                        |       |     |     |    |    |    |   |   |
|--------------|-------|--------|------------------------------------------------------------------------|-------|-----|-----|----|----|----|---|---|
| ENOA_HUMAN   | ENO1  | P06733 | Alpha-enolase (EC 4.2.1.11) (2-phospho-D-glycerate hydro-lyase) (C-myc | 46.8  | 307 | 87  | 60 | 75 | 94 | Y | Y |
| ANXA1_HUMAN  | ANXA1 | P04083 | Annexin A1 (Annexin I) (Annexin-1) (Calpactin II) (Calpactin-2) (Chrom | 61.6  | 268 | 104 | 35 | 77 | 56 | Y | Y |
| G3P_HUMAN    | GAPDH | P04406 | Glyceraldehyde-3-phosphate dehydrogenase (GAPDH) (EC 1.2.1.12) (Peptid | 43    | 262 | 95  | 25 | 79 | 69 | Y | Y |
| ITA3_HUMAN   | ITGA3 | P26006 | Integrin alpha-3 (CD49 antigen-like family member C) (FRP-2) (Galactop | 21.9  | 227 | 79  | 64 | 13 | 73 | Y | Y |
| A6NN80_HUMAN | ANXA6 | A6NN80 | Annexin A6                                                             | 42.1  | 205 | 73  | 70 | 21 | 45 | Y | Y |
| EDIL3_HUMAN  | EDIL3 | O43854 | EGF-like repeat and discoidin I-like domain-containing protein 3 (Deve | 36.5  | 146 | 9   | 61 |    | 77 | Y | Y |
| CN37_HUMAN   | CNP   | P09543 | 2',3'-cyclic-nucleotide 3'-phosphodiesterase (CNP) (CNPase) (EC 3.1.4. | 22.8  | 51  | 28  | 7  | 1  | 15 | Y | Y |
| C9JV86_HUMAN | CD63  | C9JV86 | CD63 antigen                                                           | 5.08  | 46  | 10  | 12 | 12 | 12 | Y | Y |
| DESP_HUMAN   | DSP   | P15924 | Desmoplakin (DP) (250/210 kDa paraneoplastic pemphigus antigen)        | 0.906 | 3   |     |    | 1  | 2  | Y | Y |
| CPSM_HUMAN   | CPS1  | P31327 | Carbamoyl-phosphate synthase [ammonia], mitochondrial (EC 6.3.4.16) (C | 23.6  | 84  |     |    |    | 84 | Y |   |
| PAPP1_HUMAN  | PAPPA | Q13219 | Pappalysin-1 (EC 3.4.24.79) (Insulin-like growth factor-dependent IGF- | 10.6  | 38  |     |    |    | 39 | Y |   |
| IFIT1_HUMAN  | IFIT1 | P09914 | Interferon-induced protein with tetratricopeptide repeats 1 (IFIT-1) ( | 28.2  | 36  | 37  |    |    |    | Y |   |
| MX2_HUMAN    | MX2   | P20592 | Interferon-induced GTP-binding protein Mx2 (Interferon-regulated resis | 21.4  | 30  | 27  | 3  |    |    | Y |   |
| LAMA1_HUMAN  | LAMA1 | P25391 | Laminin subunit alpha-1 (Laminin A chain) (Laminin-1 subunit alpha) (L | 4.62  | 27  | 16  | 11 |    |    | Y |   |
| TYPH_HUMAN   | TYMP  | P19971 | Thymidine phosphorylase (TP) (EC 2.4.2.4) (Gliostatin) (Platelet-deriv | 26.8  | 26  | 26  |    |    | 1  | Y |   |

|              |         |        |                                                                        |      |    |    |    |   |    |  |   |  |
|--------------|---------|--------|------------------------------------------------------------------------|------|----|----|----|---|----|--|---|--|
| ITLN1_HUMAN  | ITLN1   | Q8WWA0 | Intelectin-1 (ITLN-1) (Endothelial lectin HL-1) (Galactofuranose-bindi | 24   | 25 |    | 24 |   |    |  | Y |  |
| SAMD9_HUMAN  | SAMD9   | Q5K651 | Sterile alpha motif domain-containing protein 9 (SAM domain-containing | 4.41 | 23 | 17 |    |   | 6  |  | Y |  |
| NEK9_HUMAN   | NEK9    | Q8TD19 | Serine/threonine-protein kinase Nek9 (EC 2.7.11.1) (Nercc1 kinase) (Ne | 7.46 | 21 | 7  |    | 5 | 9  |  | Y |  |
| BCAT1_HUMAN  | BCAT1   | P54687 | Branched-chain-amino-acid aminotransferase, cytosolic (BCAT(c)) (EC 2. | 9.84 | 16 | 5  | 1  |   | 10 |  | Y |  |
| PROS_HUMAN   | PROS1   | P07225 | Vitamin K-dependent protein S                                          | 8.14 | 13 |    | 12 | 1 |    |  | Y |  |
| CMPK2_HUMAN  | CMPK2   | Q5EBM0 | UMP-CMP kinase 2, mitochondrial (EC 2.7.4.14) (Nucleoside-diphosphate  | 12.9 | 13 | 13 |    |   |    |  | Y |  |
| B4E1Z4_HUMAN | CFB     | B4E1Z4 | Complement factor B (Uncharacterized protein) (cDNA FLJ55673, highly s | 3.24 | 12 | 6  | 3  | 4 |    |  | Y |  |
| MAMC2_HUMAN  | MAMDC2  | Q7Z304 | MAM domain-containing protein 2 (MAM domain-containing proteoglycan) ( | 9.04 | 11 | 10 |    | 1 |    |  | Y |  |
| DOC10_HUMAN  | DOCK10  | Q96BY6 | Dedicator of cytokinesis protein 10 (Zizimin-3)                        | 3.44 | 10 | 6  | 3  |   | 1  |  | Y |  |
| HYCCL_HUMAN  | FAM126A | Q9BYI3 | Hyccin (Down-regulated by CTNBN1 protein A) (Protein FAM126A)          | 3.26 | 9  | 2  | 3  |   | 4  |  | Y |  |
| PDGFD_HUMAN  | PDGFD   | Q9GZP0 | Platelet-derived growth factor D (PDGF-D) (Iris-expressed growth facto | 8.92 | 9  |    | 3  | 6 |    |  | Y |  |
| AMGO2_HUMAN  | AMIGO2  | Q86SJ2 | Amphoterin-induced protein 2 (AMIGO-2) (Alivin-1) (Differentially expr | 8.62 | 8  |    |    |   | 8  |  | Y |  |
| SPAT5_HUMAN  | SPATA5  | Q8NB90 | Spermatogenesis-associated protein 5 (ATPase family protein 2 homolog) | 2.91 | 8  |    |    |   | 4  |  | Y |  |
| PIP_HUMAN    | PIP     | P12273 | Prolactin-inducible protein (Gross cystic disease fluid protein 15) (G | 26   | 8  |    | 1  | 7 |    |  | Y |  |
| CALB2_HUMAN  | CALB2   | P22676 | Calretinin (CR) (29 kDa calbindin)                                     | 15.1 | 7  |    |    |   | 7  |  | Y |  |

|              |          |        |                                                                        |      |   |   |   |   |   |   |  |
|--------------|----------|--------|------------------------------------------------------------------------|------|---|---|---|---|---|---|--|
| AP3S1_HUMAN  | AP3S1    | Q92572 | AP-3 complex subunit sigma-1 (AP-3 complex subunit sigma-3A) (Adapter- | 7.77 | 5 | 2 |   |   | 3 | Y |  |
| Q6NUJ9_HUMAN | SULF1    | Q6NUJ9 | SULF1 protein                                                          | 4.5  | 5 | 1 | 4 |   |   | Y |  |
| ATS12_HUMAN  | ADAMTS12 | P58397 | A disintegrin and metalloproteinase with thrombospondin motifs 12 (ADA | 3.45 | 5 | 6 |   |   |   | Y |  |
| GBP1_HUMAN   | GBP1     | P32455 | Interferon-induced guanylate-binding protein 1 (GTP-binding protein 1) | 2.36 | 5 | 5 |   |   |   | Y |  |
| C9JYD7_HUMAN | GAL3ST1  | C9JYD7 | Galactosylceramide sulfotransferase (Fragment)                         | 11.6 | 4 |   |   | 4 |   | Y |  |
| CBPE_HUMAN   | CPE      | P16870 | Carboxypeptidase E (CPE) (EC 3.4.17.10) (Carboxypeptidase H) (CPH) (En | 5.88 | 4 |   | 4 |   |   | Y |  |
| I6N6Q6_HUMAN | COX2     | I6N6Q6 | Cytochrome c oxidase subunit 2                                         | 7.05 | 4 |   | 4 |   |   | Y |  |
| ITA4_HUMAN   | ITGA4    | P13612 | Integrin alpha-4 (CD49 antigen-like family member D) (Integrin alpha-I | 3.78 | 4 |   | 4 |   |   | Y |  |
| B7Z4A7_HUMAN | EVI2B    | B7Z4A7 | Protein EVI2B (cDNA FLJ55224, highly similar to EVI2B protein)         | 6.05 | 4 | 4 |   |   |   | Y |  |
| PGDH_HUMAN   | HPGD     | P15428 | 15-hydroxyprostaglandin dehydrogenase [NAD(+)] (15-PGDH) (EC 1.1.1.141 | 10.5 | 3 |   |   | 3 |   | Y |  |
| RN215_HUMAN  | RNF215   | Q9Y6U7 | RING finger protein 215                                                | 4.51 | 2 |   |   | 1 | 1 | Y |  |
| NID1_HUMAN   | NID1     | P14543 | Nidogen-1 (NID-1) (Entactin)                                           | 2.17 | 2 |   | 1 |   | 1 | Y |  |
| NUB1_HUMAN   | NUB1     | Q9Y5A7 | NEDD8 ultimate buster 1 (Negative regulator of ubiquitin-like proteins | 2.28 | 2 | 1 |   |   | 1 | Y |  |
| A6NC48_HUMAN | BST1     | A6NC48 | ADP-ribosyl cyclase 2                                                  | 3.9  | 2 |   | 2 |   |   | Y |  |
| OSMR_HUMAN   | OSMR     | Q99650 | Oncostatin-M-specific receptor subunit beta (Interleukin-31 receptor s | 1.63 | 2 | 2 |   |   |   | Y |  |
| SAM9L_HUMAN  | SAMD9L   | Q8IVG5 | Sterile alpha motif domain-containing protein 9-like (SAM domain-conta | 1.83 | 2 | 2 |   |   |   | Y |  |

|              |              |        |                                                                        |       |     |     |    |     |     |   |  |
|--------------|--------------|--------|------------------------------------------------------------------------|-------|-----|-----|----|-----|-----|---|--|
| MTAP2_HUMAN  | MAP2         | P11137 | Microtubule-associated protein 2 (MAP-2)                               | 0.547 | 2   |     |    |     | 2   | Y |  |
| LPIN3_HUMAN  | LPIN3        | Q9BQK8 | Phosphatidate phosphatase LPIN3 (EC 3.1.3.4) (Lipin-3) (Lipin-3-like)  | 1.65  | 2   | 2   |    |     | 1   | Y |  |
| MICA3_HUMAN  | MICAL3       | Q7RTP6 | Protein-methionine sulfoxide oxidase MICAL3 (EC 1.14.13.-) (Molecule i | 0.749 | 1   |     |    |     | 1   | Y |  |
| SPTN5_HUMAN  | SPTBN5       | Q9NRC6 | Spectrin beta chain, non-erythrocytic 5 (Beta-V spectrin)              | 0.245 | 1   |     | 1  |     |     | Y |  |
| FBN2_HUMAN   | FBN2         | P35556 | Fibrillin-2                                                            | 0.412 | 1   |     | 1  |     |     | Y |  |
| Q8IWP6_HUMAN | Q8IWP6_HUMAN | Q8IWP6 | Class IVb beta tubulin                                                 | 48.8  | 544 | 127 | 71 | 116 | 239 |   |  |
| B4DVE1_HUMAN | B4DVE1_HUMAN | B4DVE1 | cDNA FLJ53478, highly similar to Galectin-3-binding protein            | 36.6  | 465 | 178 | 94 | 135 | 60  |   |  |
| B3KPS3_HUMAN | B3KPS3_HUMAN | B3KPS3 | cDNA FLJ32131 fis, clone PEBLM2000267, highly similar to Tubulin alpha | 48.3  | 455 | 113 | 58 | 111 | 177 |   |  |
| B2R6J2_HUMAN | VIL2         | B2R6J2 | Villin 2 (ezrin) (VIL2)                                                | 39.6  | 238 | 78  | 52 | 34  | 78  |   |  |
| A8K7F6_HUMAN | A8K7F6_HUMAN | A8K7F6 | cDNA FLJ78244, highly similar to Homo sapiens eukaryotic translation i | 45.3  | 202 | 50  | 28 | 46  | 79  |   |  |
| A8K8D9_HUMAN | A8K8D9_HUMAN | A8K8D9 | Glucose-6-phosphate 1-dehydrogenase (EC 1.1.1.49)                      | 57.9  | 190 | 57  | 10 | 107 | 22  |   |  |
| A8K6Q8_HUMAN | A8K6Q8_HUMAN | A8K6Q8 | cDNA FLJ75881, highly similar to Homo sapiens transferrin receptor (p9 | 35.9  | 181 | 73  | 45 | 20  | 45  |   |  |
| Q59E99_HUMAN | Q59E99_HUMAN | Q59E99 | Thrombospondin 1 variant (Fragment)                                    | 21.6  | 164 | 39  | 22 | 88  | 16  |   |  |
| Q59GM9_HUMAN | Q59GM9_HUMAN | Q59GM9 | Phosphorylase (EC 2.4.1.1) (Fragment)                                  | 28.7  | 139 | 20  | 4  | 53  | 66  |   |  |
| Q8N9M2_HUMAN | Q8N9M2_HUMAN | Q8N9M2 | cDNA FLJ36887 fis, clone BNGH42005504, highly similar to 26S PROTEASOM | 36.1  | 131 | 41  | 20 | 34  | 36  |   |  |

|              |              |        |                                                                        |      |     |    |    |    |    |  |  |
|--------------|--------------|--------|------------------------------------------------------------------------|------|-----|----|----|----|----|--|--|
| B4DE36_HUMAN | B4DE36_HUMAN | B4DE36 | Glucose-6-phosphate isomerase (EC 5.3.1.9)                             | 31.7 | 122 | 22 | 17 | 48 | 36 |  |  |
| E1NZA1_HUMAN | PRIC295      | E1NZA1 | Peroxisome proliferator activated receptor interacting complex protein | 16.5 | 119 | 25 | 4  | 27 | 65 |  |  |
| B2RCM2_HUMAN | B2RCM2_HUMAN | B2RCM2 | cDNA, FLJ96156, highly similar to Homo sapiens leucyl-tRNA synthetase  | 24.1 | 117 | 27 | 6  | 14 | 71 |  |  |
| B2R5U1_HUMAN | B2R5U1_HUMAN | B2R5U1 | cDNA, FLJ92620, highly similar to Homo sapiens staphylococcal nuclease | 22.7 | 116 | 37 | 2  | 47 | 32 |  |  |
| B4DJ30_HUMAN | B4DJ30_HUMAN | B4DJ30 | cDNA FLJ61290, highly similar to Neutral alpha-glucosidase AB          | 21.9 | 113 | 41 | 19 | 30 | 28 |  |  |
| B4DMC0_HUMAN | B4DMC0_HUMAN | B4DMC0 | cDNA FLJ55341, highly similar to 116 kDa U5 small nuclear ribonucleopr | 22.1 | 112 | 15 | 10 | 37 | 50 |  |  |
| A8K8U1_HUMAN | A8K8U1_HUMAN | A8K8U1 | cDNA FLJ77762, highly similar to Homo sapiens cullin-associated and ne | 17.4 | 112 | 39 | 27 | 36 | 11 |  |  |
| B3KTQ2_HUMAN | B3KTQ2_HUMAN | B3KTQ2 | cDNA FLJ38589 fis, clone HCHON2010074, highly similar to LACTADHERIN   | 36.1 | 105 | 17 | 57 | 12 | 19 |  |  |
| B3KX11_HUMAN | B3KX11_HUMAN | B3KX11 | cDNA FLJ44436 fis, clone UTERU2019706, highly similar to T-complex pro | 29.7 | 104 | 29 | 11 | 34 | 31 |  |  |
| Q53HU0_HUMAN | Q53HU0_HUMAN | Q53HU0 | Chaperonin containing TCP1, subunit 8 (Theta) variant (Fragment)       | 42.9 | 103 | 32 | 10 | 40 | 23 |  |  |
| A8K2T7_HUMAN | A8K2T7_HUMAN | A8K2T7 | cDNA FLJ76780, highly similar to Homo sapiens epidermal growth factor  | 14.6 | 101 | 41 | 22 | 2  | 42 |  |  |
| A8K916_HUMAN | A8K916_HUMAN | A8K916 | cDNA FLJ78481, highly similar to Homo sapiens adaptor-related protein  | 18   | 99  | 32 | 9  | 35 | 29 |  |  |
| B3KX72_HUMAN | B3KX72_HUMAN | B3KX72 | cDNA FLJ44920 fis, clone BRAMY3011501, highly similar to Heterogeneous | 22   | 97  | 24 | 9  | 12 | 54 |  |  |
| Q59G75_HUMAN | Q59G75_HUMAN | Q59G75 | Isoleucyl-tRNA synthetase, cytoplasmic variant (Fragment)              | 16.3 | 96  | 27 |    | 25 | 46 |  |  |

|              |              |        |                                                                        |      |    |    |    |    |    |  |  |
|--------------|--------------|--------|------------------------------------------------------------------------|------|----|----|----|----|----|--|--|
| B2R8R5_HUMAN | B2R8R5_HUMAN | B2R8R5 | cDNA, FLJ94025, highly similar to Homo sapiens tripartite motif-contai | 20.4 | 94 | 2  | 3  | 39 | 50 |  |  |
| A8K6A5_HUMAN | A8K6A5_HUMAN | A8K6A5 | cDNA FLJ77742, highly similar to Homo sapiens integrin, alpha 5 (fibro | 13.9 | 92 | 41 | 19 |    | 34 |  |  |
| B4DLV7_HUMAN | B4DLV7_HUMAN | B4DLV7 | cDNA FLJ60299, highly similar to Rab GDP dissociation inhibitor beta   | 38.3 | 91 | 32 | 22 | 8  | 30 |  |  |
| Q96MH4_HUMAN | Q96MH4_HUMAN | Q96MH4 | cDNA FLJ32377 fis, clone SKMUS1000014, highly similar to Polyubiquitin | 15.2 | 91 | 20 | 23 | 28 | 20 |  |  |
| Q53HV1_HUMAN | Q53HV1_HUMAN | Q53HV1 | Ribosomal protein S4, X-linked X isoform variant (Fragment)            | 51.7 | 84 | 36 | 6  | 6  | 38 |  |  |
| Q59GB4_HUMAN | Q59GB4_HUMAN | Q59GB4 | Dihydropyrimidinase-like 2 variant (Fragment)                          | 25.5 | 84 | 22 | 13 | 23 | 24 |  |  |
| Q53EM5_HUMAN | Q53EM5_HUMAN | Q53EM5 | Transketolase variant (Fragment)                                       | 29.7 | 84 | 10 | 13 | 56 | 8  |  |  |
| B2R5B3_HUMAN | B2R5B3_HUMAN | B2R5B3 | Histone H2A                                                            | 40.8 | 83 | 17 | 11 | 14 | 42 |  |  |
| B2R5M8_HUMAN | B2R5M8_HUMAN | B2R5M8 | Isocitrate dehydrogenase [NADP] (EC 1.1.1.42)                          | 34.1 | 83 | 27 | 10 | 39 | 8  |  |  |
| A8K492_HUMAN | A8K492_HUMAN | A8K492 | cDNA FLJ76789, highly similar to Homo sapiens methionine-tRNA syntheta | 14.3 | 78 | 25 | 5  | 21 | 29 |  |  |
| Q5U0C3_HUMAN | Q5U0C3_HUMAN | Q5U0C3 | RAP1A, member of RAS oncogene family                                   | 42.4 | 78 | 29 | 15 |    | 22 |  |  |
| B2R9K8_HUMAN | B2R9K8_HUMAN | B2R9K8 | cDNA, FLJ94440, highly similar to Homo sapiens chaperonin containing T | 26   | 77 | 15 | 6  | 37 | 20 |  |  |
| B4DUQ1_HUMAN | B4DUQ1_HUMAN | B4DUQ1 | cDNA FLJ54552, highly similar to Heterogeneous nuclear ribonucleoprote | 28.5 | 75 | 17 | 11 | 23 | 25 |  |  |
| A8K9V7_HUMAN | A8K9V7_HUMAN | A8K9V7 | cDNA FLJ77207                                                          | 16.1 | 75 | 32 | 11 | 9  | 25 |  |  |

|              |              |        |                                                                        |      |    |    |    |    |    |  |  |
|--------------|--------------|--------|------------------------------------------------------------------------|------|----|----|----|----|----|--|--|
| B2R657_HUMAN | B2R657_HUMAN | B2R657 | Annexin                                                                | 22.5 | 75 | 20 | 15 | 20 | 23 |  |  |
| Q53HW2_HUMAN | Q53HW2_HUMAN | Q53HW2 | Ribosomal protein P0 variant (Fragment)                                | 27.1 | 74 | 17 | 12 | 20 | 25 |  |  |
| A8K9A4_HUMAN | A8K9A4_HUMAN | A8K9A4 | cDNA FLJ75154, highly similar to Homo sapiens heterogeneous nuclear ri | 26.5 | 72 | 20 | 10 | 17 | 28 |  |  |
| Q9BU08_HUMAN | Q9BU08_HUMAN | Q9BU08 | Putative uncharacterized protein (Fragment)                            | 26.5 | 71 | 18 | 5  | 32 | 18 |  |  |
| Q53HS0_HUMAN | Q53HS0_HUMAN | Q53HS0 | Glutaminyl-tRNA synthetase variant (Fragment)                          | 26.6 | 70 | 13 | 5  | 21 | 36 |  |  |
| Q53FT8_HUMAN | Q53FT8_HUMAN | Q53FT8 | Proteasome subunit beta type (EC 3.4.25.1) (Fragment)                  | 36.5 | 69 | 17 | 7  | 43 | 5  |  |  |
| B3KMX0_HUMAN | B3KMX0_HUMAN | B3KMX0 | cDNA FLJ12837 fis, clone NT2RP2003228, highly similar to DNA replicati | 22.6 | 67 | 1  |    | 34 | 33 |  |  |
| Q53GX7_HUMAN | Q53GX7_HUMAN | Q53GX7 | Threonyl-tRNA synthetase variant (Fragment)                            | 18.1 | 67 | 26 | 7  | 22 | 13 |  |  |
| B2RD27_HUMAN | B2RD27_HUMAN | B2RD27 | cDNA, FLJ96428, highly similar to Homo sapiens proteasome (prosome, ma | 24.1 | 65 | 23 | 3  | 17 | 21 |  |  |
| Q53HV2_HUMAN | Q53HV2_HUMAN | Q53HV2 | Chaperonin containing TCP1, subunit 7 (Eta) variant (Fragment)         | 29.3 | 65 | 17 | 6  | 29 | 19 |  |  |
| Q9Y6E3_HUMAN | Q9Y6E3_HUMAN | Q9Y6E3 | HSPC027                                                                | 33.2 | 64 | 21 | 2  | 21 | 23 |  |  |
| Q53HH4_HUMAN | Q53HH4_HUMAN | Q53HH4 | Ras-GTPase-activating protein SH3-domain-binding protein variant (Frag | 18.2 | 64 | 17 | 9  | 19 | 20 |  |  |
| B4DE59_HUMAN | B4DE59_HUMAN | B4DE59 | cDNA FLJ60424, highly similar to Junction plakoglobin                  | 29.7 | 63 | 20 | 26 | 13 | 7  |  |  |
| Q59ER5_HUMAN | Q59ER5_HUMAN | Q59ER5 | WD repeat-containing protein 1 isoform 1 variant (Fragment)            | 13.5 | 62 | 24 | 10 | 13 | 15 |  |  |



|              |              |        |                                                                        |      |    |    |    |    |    |  |  |
|--------------|--------------|--------|------------------------------------------------------------------------|------|----|----|----|----|----|--|--|
| B4DY23_HUMAN | B4DY23_HUMAN | B4DY23 | cDNA FLJ61188, highly similar to Basigin                               | 35.1 | 61 | 24 | 17 | 3  | 17 |  |  |
| B3KU62_HUMAN | B3KU62_HUMAN | B3KU62 | cDNA FLJ39243 fis, clone OCBBF2008283, highly similar to Protein NDRG1 | 22.2 | 61 | 41 | 6  | 1  | 13 |  |  |
| B2R7C5_HUMAN | B2R7C5_HUMAN | B2R7C5 | cDNA, FLJ93378, highly similar to Homo sapiens MCM3 minichromosome mai | 19.9 | 60 | 2  |    | 28 | 31 |  |  |
| B3KTA3_HUMAN | B3KTA3_HUMAN | B3KTA3 | Fascin                                                                 | 25.6 | 60 | 17 | 6  | 11 | 27 |  |  |
| Q59GL1_HUMAN | Q59GL1_HUMAN | Q59GL1 | Synaptotagmin binding, cytoplasmic RNA interacting protein variant (Fr | 26   | 59 | 14 | 3  | 12 | 32 |  |  |
| B4E1G2_HUMAN | B4E1G2_HUMAN | B4E1G2 | Serine hydroxymethyltransferase (EC 2.1.2.1)                           | 31.4 | 59 | 13 | 3  | 13 | 30 |  |  |
| B2RDW0_HUMAN | B2RDW0_HUMAN | B2RDW0 | cDNA, FLJ96792, highly similar to Homo sapiens calmodulin 2 (phosphory | 40.9 | 59 | 11 | 14 | 11 | 24 |  |  |
| A8K4T6_HUMAN | A8K4T6_HUMAN | A8K4T6 | cDNA FLJ76282, highly similar to Homo sapiens proteasome (prosome, mac | 19.2 | 58 | 16 | 4  | 16 | 23 |  |  |
| B2R7W4_HUMAN | B2R7W4_HUMAN | B2R7W4 | cDNA, FLJ93632, highly similar to Homo sapiens heterogeneous nuclear r | 24.5 | 57 | 16 | 2  | 8  | 34 |  |  |
| B3KY95_HUMAN | B3KY95_HUMAN | B3KY95 | cDNA FLJ16143 fis, clone BRAMY2038516, highly similar to Protein disul | 23.4 | 55 | 27 | 15 | 8  | 4  |  |  |
| B2RBA6_HUMAN | B2RBA6_HUMAN | B2RBA6 | cDNA, FLJ95407, highly similar to Homo sapiens MCM7 minichromosome mai | 33.1 | 53 |    | 1  | 16 | 37 |  |  |
| B4E2S3_HUMAN | B4E2S3_HUMAN | B4E2S3 | cDNA FLJ56561                                                          | 15.4 | 53 | 29 | 9  |    | 15 |  |  |
| B4DTS6_HUMAN | B4DTS6_HUMAN | B4DTS6 | cDNA FLJ54117, highly similar to CD97 antigen                          | 9.21 | 52 | 21 | 9  |    | 22 |  |  |
| Q9BTQ7_HUMAN | Q9BTQ7_HUMAN | Q9BTQ7 | Similar to ribosomal protein L23 (Fragment)                            | 34.3 | 51 | 18 | 14 | 6  | 14 |  |  |

|              |              |        |                                                                        |      |    |    |    |    |    |  |  |
|--------------|--------------|--------|------------------------------------------------------------------------|------|----|----|----|----|----|--|--|
| B3KQ33_HUMAN | B3KQ33_HUMAN | B3KQ33 | cDNA FLJ32715 fis, clone TESTI2000784, highly similar to Importin-4    | 11.9 | 50 | 14 |    | 14 | 23 |  |  |
| A8K666_HUMAN | A8K666_HUMAN | A8K666 | cDNA FLJ75460, highly similar to Homo sapiens phenylalanine-tRNA synth | 20.2 | 50 | 10 | 4  | 15 | 21 |  |  |
| B7Z2N4_HUMAN | B7Z2N4_HUMAN | B7Z2N4 | cDNA FLJ56074, highly similar to 150 kDa oxygen-regulated protein (Orp | 19.1 | 50 | 41 | 1  | 2  | 6  |  |  |
| RTCB_HUMAN   | RTCB         | Q9Y3I0 | tRNA-splicing ligase RtcB homolog (EC 6.5.1.3)                         | 25   | 49 | 13 | 1  | 11 | 25 |  |  |
| B3KVN0_HUMAN | B3KVN0_HUMAN | B3KVN0 | cDNA FLJ16785 fis, clone NT2RI2015342, highly similar to Solute carrie | 9.13 | 49 | 26 | 3  | 7  | 13 |  |  |
| Q59EF6_HUMAN | Q59EF6_HUMAN | Q59EF6 | Calpain 2, large [catalytic] subunit variant (Fragment)                | 19.5 | 48 | 12 | 1  | 2  | 33 |  |  |
| B2R6K4_HUMAN | B2R6K4_HUMAN | B2R6K4 | cDNA, FLJ92996, highly similar to Homo sapiens guanine nucleotide bind | 22.1 | 48 | 14 | 13 | 7  | 15 |  |  |
| A8K3C3_HUMAN | A8K3C3_HUMAN | A8K3C3 | T-complex protein 1 subunit delta                                      | 20.4 | 48 | 12 | 10 | 14 | 12 |  |  |
| B4E175_HUMAN | B4E175_HUMAN | B4E175 | cDNA FLJ54775, highly similar to Syntaxin-binding protein 2            | 21.5 | 48 | 25 | 16 | 1  | 5  |  |  |
| A8K6Y1_HUMAN | A8K6Y1_HUMAN | A8K6Y1 | cDNA FLJ75526, highly similar to Homo sapiens proliferation-associated | 32.7 | 46 | 13 | 1  | 17 | 16 |  |  |
| B2R6D7_HUMAN | B2R6D7_HUMAN | B2R6D7 | cDNA, FLJ92904, highly similar to Homo sapiens casein kinase 2, alpha  | 22.5 | 46 | 12 |    | 22 | 14 |  |  |
| A8K525_HUMAN | A8K525_HUMAN | A8K525 | cDNA FLJ76817, highly similar to Homo sapiens non-POU domain containin | 22.3 | 45 | 9  |    | 15 | 24 |  |  |
| B4DUF1_HUMAN | B4DUF1_HUMAN | B4DUF1 | cDNA FLJ59760, highly similar to 1,4-alpha-glucan branching enzyme (EC | 18.3 | 44 | 19 |    | 1  | 28 |  |  |
| B7Z5J7_HUMAN | B7Z5J7_HUMAN | B7Z5J7 | cDNA FLJ58682, highly similar to Vesicle-fusing ATPase (EC 3.6.4.6)    | 18.4 | 44 | 17 | 9  | 7  | 13 |  |  |

|              |                |        |                                                                        |      |    |    |    |    |    |  |  |
|--------------|----------------|--------|------------------------------------------------------------------------|------|----|----|----|----|----|--|--|
| A8K5Y7_HUMAN | A8K5Y7_HUMAN   | A8K5Y7 | cDNA FLJ78655, highly similar to Homo sapiens exportin 5 (XPO5), mRNA  | 11.9 | 41 | 3  |    | 12 | 26 |  |  |
| A8K529_HUMAN | A8K529_HUMAN   | A8K529 | cDNA FLJ76184, highly similar to Homo sapiens NOL1/NOP2/Sun domain fam | 13.8 | 41 | 14 |    | 6  | 22 |  |  |
| B2RDE1_HUMAN | B2RDE1_HUMAN   | B2RDE1 | cDNA, FLJ96568, highly similar to Homo sapiens tropomyosin 3 (TPM3), m | 28.6 | 41 | 28 | 4  | 3  | 6  |  |  |
| A8K590_HUMAN | A8K590_HUMAN   | A8K590 | cDNA FLJ77456, highly similar to Homo sapiens interleukin enhancer bin | 20.5 | 40 | 9  | 6  | 6  | 21 |  |  |
| B3KXZ4_HUMAN | B3KXZ4_HUMAN   | B3KXZ4 | cDNA FLJ46429 fis, clone THYMU3014372, highly similar to DNA replicati | 22.2 | 40 |    |    | 23 | 18 |  |  |
| A8K9P0_HUMAN | A8K9P0_HUMAN   | A8K9P0 | cDNA FLJ78413, highly similar to Homo sapiens albumin, mRNA            | 8.88 | 40 | 9  | 9  | 11 | 11 |  |  |
| B2R983_HUMAN | B2R983_HUMAN   | B2R983 | cDNA, FLJ94267, highly similar to Homo sapiens glutathione S-transfera | 27   | 39 | 16 | 3  | 9  | 11 |  |  |
| B2R5W3_HUMAN | B2R5W3_HUMAN   | B2R5W3 | cDNA, FLJ92658, highly similar to Homo sapiens poly (ADP-ribose) polym | 10.8 | 38 | 10 | 4  | 10 | 15 |  |  |
| B3KMB1_HUMAN | B3KMB1_HUMAN   | B3KMB1 | Structural maintenance of chromosomes protein                          | 11.1 | 37 | 10 |    | 12 | 15 |  |  |
| B4DKN9_HUMAN | B4DKN9_HUMAN   | B4DKN9 | cDNA FLJ57740, highly similar to Transforming protein RhoA             | 27.7 | 37 | 10 | 12 |    | 14 |  |  |
| B2R858_HUMAN | B2R858_HUMAN   | B2R858 | cDNA, FLJ93750, Homo sapiens DEAD (Asp-Glu-Ala-Asp) box polypeptide 6  | 17.2 | 37 | 12 |    | 17 | 8  |  |  |
| B2R6J4_HUMAN | B2R6J4_HUMAN   | B2R6J4 | cDNA, FLJ92975, highly similar to Homo sapiens nucleosome assembly pro | 17.3 | 37 | 9  | 8  | 12 | 8  |  |  |
| A3KC71_HUMAN | okuribin       | A3KC71 | Nuclear envelope protein okuribin                                      | 11.7 | 37 | 5  | 21 | 4  | 7  |  |  |
| Q6MZK8_HUMAN | DKFZp686K06110 | Q6MZK8 | Putative uncharacterized protein DKFZp686K06110                        | 7.77 | 37 |    |    | 35 |    |  |  |

|              |              |        |                                                                         |      |    |    |    |    |    |  |  |
|--------------|--------------|--------|-------------------------------------------------------------------------|------|----|----|----|----|----|--|--|
| B4DNN4_HUMAN | B4DNN4_HUMAN | B4DNN4 | Ribonucleoside-diphosphate reductase (EC 1.17.4.1)                      | 13   | 35 | 3  | 3  | 13 | 17 |  |  |
| B4DV28_HUMAN | B4DV28_HUMAN | B4DV28 | cDNA FLJ54170, highly similar to Cytosolic nonspecific dipeptidase      | 16.8 | 35 | 13 | 7  | 5  | 10 |  |  |
| A8K6I4_HUMAN | A8K6I4_HUMAN | A8K6I4 | cDNA FLJ76877, highly similar to Homo sapiens superkiller viralicidic   | 10.8 | 34 | 2  |    | 21 | 13 |  |  |
| B4DMB5_HUMAN | B4DMB5_HUMAN | B4DMB5 | CTP synthase (EC 6.3.4.2) (UTP--ammonia ligase)                         | 19.3 | 34 | 11 |    | 14 | 11 |  |  |
| B2RAK1_HUMAN | B2RAK1_HUMAN | B2RAK1 | cDNA, FLJ94965, highly similar to Homo sapiens leucyl/cystinyl aminope  | 13.6 | 33 | 27 | 2  |    | 5  |  |  |
| Q53EP4_HUMAN | Q53EP4_HUMAN | Q53EP4 | Ribophorin I variant (Fragment)                                         | 16.5 | 33 | 17 | 16 |    |    |  |  |
| A8K6Q6_HUMAN | A8K6Q6_HUMAN | A8K6Q6 | cDNA FLJ78639                                                           | 10.9 | 32 | 12 | 11 |    | 9  |  |  |
| A8K2N0_HUMAN | A8K2N0_HUMAN | A8K2N0 | cDNA FLJ77835, highly similar to Homo sapiens complement component 1,   | 16   | 32 | 24 | 9  | 3  |    |  |  |
| B4DXV7_HUMAN | B4DXV7_HUMAN | B4DXV7 | cDNA FLJ57661, highly similar to GMP synthase (glutamine-hydrolyzing)   | 16.3 | 31 | 4  |    | 11 | 18 |  |  |
| B2R6P3_HUMAN | B2R6P3_HUMAN | B2R6P3 | cDNA, FLJ93047, highly similar to Homo sapiens matrix metalloproteinase | 12.9 | 31 |    | 12 |    | 18 |  |  |
| A8K6A6_HUMAN | A8K6A6_HUMAN | A8K6A6 | cDNA FLJ78619, highly similar to Homo sapiens melanoma cell adhesion m  | 15.8 | 31 | 17 |    |    | 13 |  |  |
| B3KQT9_HUMAN | B3KQT9_HUMAN | B3KQT9 | cDNA PSEC0175 fis, clone OVARC1000169, highly similar to Protein disul  | 24.6 | 31 | 16 | 11 | 2  | 2  |  |  |
| B4DZF2_HUMAN | B4DZF2_HUMAN | B4DZF2 | cDNA FLJ59571, highly similar to Eukaryotic translation initiation fac  | 10   | 29 | 5  | 1  | 7  | 19 |  |  |
| Q9H9B7_HUMAN | Q9H9B7_HUMAN | Q9H9B7 | Coatomer subunit gamma                                                  | 11   | 29 | 3  | 4  | 7  | 16 |  |  |

|              |               |        |                                                                        |      |    |    |    |    |    |  |  |
|--------------|---------------|--------|------------------------------------------------------------------------|------|----|----|----|----|----|--|--|
| B2RA70_HUMAN | B2RA70_HUMAN  | B2RA70 | cDNA, FLJ94729, highly similar to Homo sapiens v-yes-1 Yamaguchi sarco | 14.2 | 29 | 7  | 6  |    | 14 |  |  |
| Q5JQ44_HUMAN | DKFZp547A0616 | Q5JQ44 | Putative uncharacterized protein DKFZp547A0616 (Fragment)              | 35.4 | 29 | 10 | 6  | 2  | 11 |  |  |
| B4DS24_HUMAN | B4DS24_HUMAN  | B4DS24 | cDNA FLJ50635, highly similar to ATP-dependent RNA helicase DDX19A (EC | 20.8 | 28 |    |    | 8  | 21 |  |  |
| B4DI61_HUMAN | B4DI61_HUMAN  | B4DI61 | cDNA FLJ58182, highly similar to Protein CYR61                         | 15.7 | 28 | 10 | 3  |    | 16 |  |  |
| A8K766_HUMAN | A8K766_HUMAN  | A8K766 | cDNA FLJ77343, highly similar to Homo sapiens electron-transfer-flavop | 35.7 | 28 | 3  |    | 15 | 10 |  |  |
| A8KA19_HUMAN | A8KA19_HUMAN  | A8KA19 | cDNA FLJ75831, highly similar to Homo sapiens exportin, tRNA (nuclear  | 9.15 | 28 | 6  | 4  | 8  | 10 |  |  |
| A8K0T9_HUMAN | A8K0T9_HUMAN  | A8K0T9 | cDNA FLJ75422, highly similar to Homo sapiens capping protein (actin f | 24.5 | 28 | 11 | 5  | 7  | 5  |  |  |
| A8K139_HUMAN | A8K139_HUMAN  | A8K139 | cDNA FLJ76744, highly similar to Homo sapiens L1 cell adhesion molecul | 10.3 | 28 | 28 |    |    |    |  |  |
| A8K6H9_HUMAN | A8K6H9_HUMAN  | A8K6H9 | cDNA FLJ75876, highly similar to Homo sapiens solute carrier family 38 | 6.32 | 27 | 7  | 10 |    | 10 |  |  |
| B4DRT4_HUMAN | B4DRT4_HUMAN  | B4DRT4 | cDNA FLJ51535, highly similar to Phosphatidylethanolamine-binding prot | 31.6 | 27 | 10 | 8  | 4  | 5  |  |  |
| A8KAJ3_HUMAN | A8KAJ3_HUMAN  | A8KAJ3 | cDNA FLJ77823, highly similar to Homo sapiens EGF-containing fibulin-1 | 12   | 27 | 14 | 10 |    | 2  |  |  |
| A8K690_HUMAN | A8K690_HUMAN  | A8K690 | cDNA FLJ76863, highly similar to Homo sapiens stress-induced-phosphopr | 24.5 | 27 | 20 | 3  | 4  | 1  |  |  |
| B3KT14_HUMAN | B3KT14_HUMAN  | B3KT14 | cDNA FLJ37450 fis, clone BRAWH2010354, highly similar to Monoamine-sul | 16.9 | 27 | 17 | 2  | 8  |    |  |  |
| B2RDF5_HUMAN | B2RDF5_HUMAN  | B2RDF5 | cDNA, FLJ96587, highly similar to Homo sapiens SUMO-1 activating enzym | 12.8 | 26 | 2  |    | 12 | 13 |  |  |
| I1SRC5_HUMAN | I1SRC5_HUMAN  | I1SRC5 | UBE2L3/KRAS fusion protein                                             | 26   | 26 |    | 7  |    | 13 |  |  |

|              |              |        |                                                                        |      |    |    |    |    |    |  |  |
|--------------|--------------|--------|------------------------------------------------------------------------|------|----|----|----|----|----|--|--|
| B2RE34_HUMAN | B2RE34_HUMAN | B2RE34 | cDNA, FLJ96901, highly similar to Homo sapiens Rac GTPase activating p | 11.7 | 26 | 11 | 12 | 1  | 4  |  |  |
| Q59EK6_HUMAN | Q59EK6_HUMAN | Q59EK6 | TNF receptor-associated protein 1 variant (Fragment)                   | 15.6 | 26 | 13 |    | 9  | 3  |  |  |
| B3KRF9_HUMAN | B3KRF9_HUMAN | B3KRF9 | cDNA FLJ34156 fis, clone FCBBF3013266, highly similar to Tsukushi (Leu | 21.5 | 26 | 11 |    | 15 |    |  |  |
| B4DPM0_HUMAN | B4DPM0_HUMAN | B4DPM0 | Pyruvate kinase (EC 2.7.1.40)                                          | 4.51 | 26 | 5  | 5  |    |    |  |  |
| B2R9S4_HUMAN | B2R9S4_HUMAN | B2R9S4 | cDNA, FLJ94534, highly similar to Homo sapiens capping protein (actin  | 17.2 | 25 | 7  | 1  | 1  | 17 |  |  |
| A8K4H1_HUMAN | A8K4H1_HUMAN | A8K4H1 | cDNA FLJ78268, highly similar to Homo sapiens fusion (involved in t(12 | 9.33 | 25 | 4  |    | 8  | 14 |  |  |
| Q4LE69_HUMAN | PIK4CA       | Q4LE69 | PIK4CA variant protein (Fragment)                                      | 5.61 | 25 | 15 | 3  |    | 8  |  |  |
| A8KA84_HUMAN | A8KA84_HUMAN | A8KA84 | cDNA FLJ78682, highly similar to Homo sapiens 2'-5'-oligoadenylate syn | 13   | 25 | 26 |    |    |    |  |  |
| A8K6X3_HUMAN | A8K6X3_HUMAN | A8K6X3 | cDNA FLJ78679, highly similar to Homo sapiens DEAD (Asp-Glu-Ala-Asp) b | 10.9 | 24 |    |    | 3  | 25 |  |  |
| B4DQ93_HUMAN | B4DQ93_HUMAN | B4DQ93 | cDNA FLJ52996, highly similar to Syntenin-1                            | 16.9 | 24 | 1  | 7  | 10 | 7  |  |  |
| A8K607_HUMAN | A8K607_HUMAN | A8K607 | cDNA FLJ76855, highly similar to Homo sapiens exportin 7 (XPO7), mRNA  | 12.2 | 24 | 3  | 1  | 17 | 4  |  |  |
| H3BQZ7_HUMAN | hCG_2044799  | H3BQZ7 | HCG2044799 (Uncharacterized protein)                                   | 12.6 | 23 | 4  |    | 2  | 17 |  |  |
| Q53F48_HUMAN | Q53F48_HUMAN | Q53F48 | Heterogeneous nuclear ribonucleoprotein H3 isoform a variant (Fragment | 8.38 | 23 | 4  |    | 9  | 11 |  |  |
| A8K5W7_HUMAN | A8K5W7_HUMAN | A8K5W7 | cDNA FLJ75180, highly similar to Homo sapiens mitochondrial isoleucine | 10.9 | 23 | 7  |    | 11 | 6  |  |  |

|              |              |        |                                                                        |      |    |    |    |    |    |  |  |
|--------------|--------------|--------|------------------------------------------------------------------------|------|----|----|----|----|----|--|--|
| B7Z2A1_HUMAN | B7Z2A1_HUMAN | B7Z2A1 | cDNA FLJ56068, highly similar to DNA damage-binding protein 1          | 12.7 | 23 |    | 1  | 21 | 1  |  |  |
| B4DJB4_HUMAN | B4DJB4_HUMAN | B4DJB4 | cDNA FLJ55931, highly similar to Isocitrate dehydrogenase              | 19.9 | 22 |    | 1  | 4  | 17 |  |  |
| B4DRW3_HUMAN | B4DRW3_HUMAN | B4DRW3 | cDNA FLJ57180, highly similar to TAR DNA-binding protein 43            | 12.7 | 22 | 6  |    | 9  | 7  |  |  |
| B4DSN3_HUMAN | B4DSN3_HUMAN | B4DSN3 | cDNA FLJ60345, highly similar to Protein transport protein Sec24C      | 6.36 | 22 | 8  | 4  | 7  | 4  |  |  |
| Q9BQQ5_HUMAN | L27a         | Q9BQQ5 | Ribosomal protein L27a                                                 | 51.9 | 21 | 7  | 2  | 2  | 11 |  |  |
| B2R4D8_HUMAN | B2R4D8_HUMAN | B2R4D8 | 60S ribosomal protein L27                                              | 30.9 | 21 | 8  |    | 4  | 9  |  |  |
| A8K5M4_HUMAN | A8K5M4_HUMAN | A8K5M4 | cDNA FLJ75088, highly similar to Homo sapiens p21 (CDKN1A)-activated k | 17.6 | 21 | 9  | 3  |    | 9  |  |  |
| B4E1U9_HUMAN | B4E1U9_HUMAN | B4E1U9 | cDNA FLJ54776, highly similar to Cell division control protein 42 homo | 17.8 | 21 | 8  | 4  | 3  | 6  |  |  |
| Q59F71_HUMAN | Q59F71_HUMAN | Q59F71 | Bone morphogenetic protein 1 isoform 1, variant (Fragment)             | 3.99 | 21 | 8  | 2  | 6  | 5  |  |  |
| A8K883_HUMAN | A8K883_HUMAN | A8K883 | cDNA FLJ77590, highly similar to Homo sapiens leucine rich repeat cont | 9.54 | 21 | 7  | 7  |    | 4  |  |  |
| Q8NBH6_HUMAN | Q8NBH6_HUMAN | Q8NBH6 | cDNA PSEC0266 fis, clone NT2RP3003649, highly similar to Homo sapiens  | 10.3 | 21 | 6  |    | 15 |    |  |  |
| B4E3A8_HUMAN | B4E3A8_HUMAN | B4E3A8 | cDNA FLJ53963, highly similar to Leukocyte elastase inhibitor          | 22   | 21 | 16 | 3  | 2  |    |  |  |
| B4DLC3_HUMAN | B4DLC3_HUMAN | B4DLC3 | Claudin                                                                | 18.7 | 21 | 10 | 10 | 1  |    |  |  |
| B2R769_HUMAN | B2R769_HUMAN | B2R769 | cDNA, FLJ93308, highly similar to Homo sapiens leukocyte-derived argin | 10.6 | 21 | 24 |    |    |    |  |  |

|              |               |        |                                                                        |      |    |    |   |   |    |  |  |
|--------------|---------------|--------|------------------------------------------------------------------------|------|----|----|---|---|----|--|--|
| B2R4C0_HUMAN | B2R4C0_HUMAN  | B2R4C0 | 60S ribosomal protein L18a                                             | 37.5 | 20 | 10 |   |   | 12 |  |  |
| A8K4W5_HUMAN | A8K4W5_HUMAN  | A8K4W5 | cDNA FLJ76813, highly similar to Homo sapiens acetyl-Coenzyme A acetyl | 12.6 | 20 | 14 | 1 | 4 | 1  |  |  |
| IFIT2_HUMAN  | IFIT2         | P09913 | Interferon-induced protein with tetratricopeptide repeats 2 (IFIT-2) ( | 22.9 | 20 | 22 |   |   |    |  |  |
| B2RBE5_HUMAN | B2RBE5_HUMAN  | B2RBE5 | cDNA, FLJ95468, highly similar to Homo sapiens transcriptional coactiv | 10.3 | 19 | 3  |   | 1 | 16 |  |  |
| Q8N1H4_HUMAN | Q8N1H4_HUMAN  | Q8N1H4 | cDNA FLJ40872 fis, clone TUTER2000283, highly similar to Homo sapiens  | 15.5 | 19 | 7  | 2 |   | 10 |  |  |
| Q53H34_HUMAN | Q53H34_HUMAN  | Q53H34 | Ribosomal protein L13a variant (Fragment)                              | 22.7 | 19 | 9  | 1 |   | 10 |  |  |
| B2RD51_HUMAN | B2RD51_HUMAN  | B2RD51 | cDNA, FLJ96455, highly similar to Homo sapiens Down syndrome critical  | 13.9 | 19 | 5  | 2 | 5 | 7  |  |  |
| Q53GW1_HUMAN | Q53GW1_HUMAN  | Q53GW1 | Vesicle transport-related protein isoform a variant (Fragment)         | 18.1 | 19 | 17 |   | 1 | 1  |  |  |
| B3KUB6_HUMAN | B3KUB6_HUMAN  | B3KUB6 | cDNA FLJ39529 fis, clone PUAEN2004067, highly similar to Band 4.1-like | 10.9 | 18 | 6  |   | 4 | 9  |  |  |
| A8K4G7_HUMAN | A8K4G7_HUMAN  | A8K4G7 | cDNA FLJ78528, highly similar to Homo sapiens vacuolar protein sorting | 16.7 | 18 | 5  | 2 | 5 | 6  |  |  |
| B4E0U6_HUMAN | B4E0U6_HUMAN  | B4E0U6 | cDNA FLJ53687, highly similar to Hsc70-interacting protein             | 12.3 | 18 | 7  | 4 | 1 | 6  |  |  |
| GT251_HUMAN  | COLGALT1      | Q8NBJ5 | Procollagen galactosyltransferase 1 (EC 2.4.1.50) (Collagen beta(1-O)g | 7.72 | 18 | 11 | 1 |   | 6  |  |  |
| Q68E05_HUMAN | DKFZp686A1765 | Q68E05 | Putative uncharacterized protein DKFZp686A1765 (Tumor protein D52-like | 23.1 | 18 | 11 | 1 |   | 6  |  |  |
| B7Z992_HUMAN | B7Z992_HUMAN  | B7Z992 | cDNA FLJ53698, highly similar to Gelsolin                              | 6.43 | 18 | 2  | 8 | 3 | 5  |  |  |



|              |              |        |                                                                         |      |    |   |   |    |    |  |  |
|--------------|--------------|--------|-------------------------------------------------------------------------|------|----|---|---|----|----|--|--|
| B3KRN4_HUMAN | B3KRN4_HUMAN | B3KRN4 | cDNA FLJ34625 fis, clone KIDNE2015244, highly similar to Serine protea  | 17.2 | 18 | 4 |   | 12 | 3  |  |  |
| B4DPD5_HUMAN | B4DPD5_HUMAN | B4DPD5 | cDNA FLJ56307, highly similar to Ubiquitin thioesterase protein OTUB1   | 21.8 | 18 | 9 |   | 6  | 3  |  |  |
| A8K5U9_HUMAN | A8K5U9_HUMAN | A8K5U9 | cDNA FLJ75056, highly similar to Homo sapiens phosphatidylinositol bin  | 8.44 | 18 | 6 | 7 | 2  | 3  |  |  |
| B4DE48_HUMAN | B4DE48_HUMAN | B4DE48 | cDNA FLJ53824, highly similar to Sorting nexin-17                       | 10.9 | 18 | 7 | 9 | 1  |    |  |  |
| Q53G21_HUMAN | Q53G21_HUMAN | Q53G21 | Small nuclear ribonucleoprotein polypeptide A' variant (Fragment)       | 18.8 | 17 |   |   | 4  | 13 |  |  |
| B3KM86_HUMAN | B3KM86_HUMAN | B3KM86 | cDNA FLJ10524 fis, clone NT2RP2000880, highly similar to Eukaryotic tr  | 10.3 | 17 | 3 |   | 2  | 13 |  |  |
| Q53HL1_HUMAN | Q53HL1_HUMAN | Q53HL1 | Myosin regulatory light chain MRCL3 variant (Fragment)                  | 18.7 | 17 | 4 | 3 | 3  | 8  |  |  |
| A8K2I7_HUMAN | A8K2I7_HUMAN | A8K2I7 | cDNA FLJ76072, highly similar to Homo sapiens GIPC PDZ domain containi  | 23.1 | 17 | 7 | 2 |    | 8  |  |  |
| B4DSD7_HUMAN | B4DSD7_HUMAN | B4DSD7 | cDNA FLJ55863, highly similar to Serine/threonine-protein phosphatase   | 8.77 | 17 |   | 5 | 3  | 7  |  |  |
| HNRDL_HUMAN  | HNRNPDL      | O14979 | Heterogeneous nuclear ribonucleoprotein D-like (hnRNP D-like) (hnRNP D) | 10   | 17 | 7 | 1 | 3  | 6  |  |  |
| B7Z7F0_HUMAN | B7Z7F0_HUMAN | B7Z7F0 | cDNA FLJ56420, highly similar to Aspartyl aminopeptidase (EC 3.4.11.21) | 7.71 | 17 | 5 | 2 | 7  | 3  |  |  |
| B2RAH7_HUMAN | B2RAH7_HUMAN | B2RAH7 | cDNA, FLJ94921, highly similar to Homo sapiens prolyl endopeptidase (P  | 6.48 | 17 | 7 | 1 | 6  | 3  |  |  |
| B3KPN7_HUMAN | B3KPN7_HUMAN | B3KPN7 | cDNA FLJ32002 fis, clone NT2RP7009394, highly similar to Exocyst compl  | 6.17 | 17 | 7 | 8 |    | 2  |  |  |
| B4DHJ3_HUMAN | B4DHJ3_HUMAN | B4DHJ3 | DNA-directed RNA polymerase (EC 2.7.7.6)                                | 10   | 16 | 1 |   | 2  | 13 |  |  |

|              |              |        |                                                                        |      |    |    |   |    |    |  |  |
|--------------|--------------|--------|------------------------------------------------------------------------|------|----|----|---|----|----|--|--|
| Q53GF0_HUMAN | Q53GF0_HUMAN | Q53GF0 | Cytidine 5'-monophosphate N-acetylneuraminic acid synthetase variant ( | 14.1 | 16 | 2  |   | 2  | 12 |  |  |
| Q59F99_HUMAN | Q59F99_HUMAN | Q59F99 | Staufen isoform b variant (Fragment)                                   | 8.46 | 16 | 6  |   |    | 10 |  |  |
| Q59EH7_HUMAN | Q59EH7_HUMAN | Q59EH7 | DnaJ (Hsp40) homolog, subfamily C, member 7 variant (Fragment)         | 9.32 | 16 | 5  |   | 5  | 6  |  |  |
| B4DF70_HUMAN | B4DF70_HUMAN | B4DF70 | cDNA FLJ60461, highly similar to Peroxiredoxin-2 (EC 1.11.1.15)        | 27.3 | 16 | 2  | 8 | 1  | 6  |  |  |
| A8K8A4_HUMAN | A8K8A4_HUMAN | A8K8A4 | cDNA FLJ77640, highly similar to Homo sapiens copine II (CPNE2), mRNA  | 7.3  | 16 | 6  | 4 | 2  | 4  |  |  |
| B2RBH6_HUMAN | B2RBH6_HUMAN | B2RBH6 | cDNA, FLJ95513, highly similar to Homo sapiens cyclin fold protein 1 ( | 12.6 | 16 | 9  | 4 |    | 4  |  |  |
| B4DM33_HUMAN | B4DM33_HUMAN | B4DM33 | cDNA FLJ52068, highly similar to Microtubule-associated protein RP/EB  | 13.9 | 16 | 8  | 4 | 4  | 3  |  |  |
| B4DKZ2_HUMAN | B4DKZ2_HUMAN | B4DKZ2 | cDNA FLJ56653, highly similar to Ribosomal protein S6 kinase alpha-3 ( | 11   | 16 | 4  |   | 10 | 2  |  |  |
| B2R514_HUMAN | B2R514_HUMAN | B2R514 | cDNA, FLJ92300, Homo sapiens COP9 subunit 6 (MOV34 homolog, 34 kD) (CO | 10.4 | 16 | 4  |   | 12 |    |  |  |
| Q53HF3_HUMAN | Q53HF3_HUMAN | Q53HF3 | Galactosidase, alpha variant (Fragment)                                | 9.56 | 16 | 7  |   | 10 |    |  |  |
| Q59EJ5_HUMAN | Q59EJ5_HUMAN | Q59EJ5 | Glutathione S-transferase M3 variant (Fragment)                        | 26.4 | 16 | 16 |   |    |    |  |  |
| A8K6K7_HUMAN | A8K6K7_HUMAN | A8K6K7 | cDNA FLJ76881, highly similar to Homo sapiens glycogen synthase 1 (mus | 5.83 | 15 | 1  |   | 2  | 12 |  |  |
| B3KRM2_HUMAN | B3KRM2_HUMAN | B3KRM2 | Serine/threonine-protein phosphatase (EC 3.1.3.16)                     | 12.9 | 15 | 3  |   | 1  | 11 |  |  |
| B4DZJ7_HUMAN | B4DZJ7_HUMAN | B4DZJ7 | Transcription elongation factor SPT5                                   | 7.14 | 15 |    |   | 6  | 9  |  |  |

|              |              |        |                                                                        |      |    |    |   |   |    |  |  |
|--------------|--------------|--------|------------------------------------------------------------------------|------|----|----|---|---|----|--|--|
| A8K3W4_HUMAN | A8K3W4_HUMAN | A8K3W4 | cDNA FLJ75163, highly similar to Homo sapiens heterogeneous nuclear ri | 7.28 | 15 |    |   | 8 | 8  |  |  |
| B4DN89_HUMAN | SFRS2        | B4DN89 | Serine/arginine-rich-splicing factor 2 (Splicing factor, arginine/seri | 19.6 | 15 | 6  |   | 1 | 8  |  |  |
| B3KRY3_HUMAN | B3KRY3_HUMAN | B3KRY3 | cDNA FLJ35079 fis, clone PLACE6005283, highly similar to Lysosome-asso | 9.87 | 15 | 6  | 5 |   | 4  |  |  |
| Q53GF9_HUMAN | Q53GF9_HUMAN | Q53GF9 | Full-length cDNA 5-PRIME end of clone CS0DF013YM24 of Fetal brain of H | 16   | 15 | 9  | 3 |   | 3  |  |  |
| Q59GU6_HUMAN | Q59GU6_HUMAN | Q59GU6 | Sorting nexin 1 isoform a variant (Fragment)                           | 12.7 | 15 | 1  | 6 | 6 | 1  |  |  |
| A8K556_HUMAN | A8K556_HUMAN | A8K556 | cDNA FLJ78217                                                          | 5.6  | 15 | 2  | 8 | 4 | 1  |  |  |
| B3KUZ8_HUMAN | B3KUZ8_HUMAN | B3KUZ8 | Aspartate aminotransferase (EC 2.6.1.1)                                | 11.3 | 15 | 5  | 3 | 7 |    |  |  |
| B4DND4_HUMAN | B4DND4_HUMAN | B4DND4 | cDNA FLJ50588, highly similar to Gamma-glutamyltransferase 5 (EC 2.3.2 | 18.4 | 15 | 16 |   |   |    |  |  |
| B2R888_HUMAN | B2R888_HUMAN | B2R888 | Monocyte differentiation antigen CD14 (Myeloid cell-specific leucine-r | 14.1 | 15 | 15 |   |   |    |  |  |
| B4DYK6_HUMAN | B4DYK6_HUMAN | B4DYK6 | cDNA FLJ56887, highly similar to Homo sapiens guanine nucleotide bindi | 10.1 | 14 | 1  |   |   | 13 |  |  |
| A8K7A4_HUMAN | A8K7A4_HUMAN | A8K7A4 | cDNA FLJ76904, highly similar to Homo sapiens methionine adenosyltrans | 7.74 | 14 | 1  | 2 | 6 | 5  |  |  |
| B2R5I8_HUMAN | B2R5I8_HUMAN | B2R5I8 | cDNA, FLJ92490, highly similar to Homo sapiens RAB32, member RAS oncog | 9.78 | 14 | 2  | 3 | 4 | 5  |  |  |
| B4DEK8_HUMAN | B4DEK8_HUMAN | B4DEK8 | cDNA FLJ53721, highly similar to Tetraspanin-3                         | 7.44 | 14 | 3  | 3 | 3 | 5  |  |  |
| B2RCJ6_HUMAN | B2RCJ6_HUMAN | B2RCJ6 | cDNA, FLJ96114, highly similar to Homo sapiens bromodomain and WD repe | 3.1  | 14 | 6  |   | 4 | 4  |  |  |

|              |                |        |                                                                        |      |    |    |    |    |    |  |  |
|--------------|----------------|--------|------------------------------------------------------------------------|------|----|----|----|----|----|--|--|
| A8K0J3_HUMAN | A8K0J3_HUMAN   | A8K0J3 | cDNA FLJ76732, highly similar to Homo sapiens TAO kinase 3 (TAOK3), mR | 5.57 | 14 | 7  | 1  |    | 4  |  |  |
| H0Y626_HUMAN | H0Y626_HUMAN   | H0Y626 | Uncharacterized protein                                                | 5.67 | 14 |    |    | 12 | 2  |  |  |
| PSG4_HUMAN   | PSG4           | Q00888 | Pregnancy-specific beta-1-glycoprotein 4 (PS-beta-G-4) (PSBG-4) (Pregn | 11.9 | 14 |    | 15 |    |    |  |  |
| Q5HYG7_HUMAN | DKFZp686M24262 | Q5HYG7 | Putative uncharacterized protein DKFZp686M24262                        | 20   | 13 |    |    |    | 13 |  |  |
| B2R7C2_HUMAN | B2R7C2_HUMAN   | B2R7C2 | cDNA, FLJ93375, highly similar to Homo sapiens ZW10, kinetochore assoc | 6.8  | 13 |    | 1  | 2  | 11 |  |  |
| B7Z6F7_HUMAN | B7Z6F7_HUMAN   | B7Z6F7 | cDNA FLJ61705, highly similar to Symplekin                             | 4.4  | 13 |    |    | 3  | 10 |  |  |
| B3KTJ9_HUMAN | B3KTJ9_HUMAN   | B3KTJ9 | cDNA FLJ38393 fis, clone FEBRA2007212                                  | 9.53 | 13 |    |    | 5  | 9  |  |  |
| B2R7M3_HUMAN | B2R7M3_HUMAN   | B2R7M3 | cDNA, FLJ93510, highly similar to Homo sapiens JTV1 gene (JTV1), mRNA  | 12.2 | 13 | 8  | 1  |    | 4  |  |  |
| B2R6F5_HUMAN | B2R6F5_HUMAN   | B2R6F5 | cDNA, FLJ92928, highly similar to Homo sapiens retinitis pigmentosa 2  | 9.71 | 13 | 9  | 1  |    | 3  |  |  |
| B7Z670_HUMAN | B7Z670_HUMAN   | B7Z670 | cDNA FLJ61703, highly similar to Neuronal cell adhesion molecule (Frag | 5.98 | 13 |    |    | 13 |    |  |  |
| B4DDM5_HUMAN | B4DDM5_HUMAN   | B4DDM5 | cDNA FLJ53298, highly similar to Peroxisomal multifunctional enzyme ty | 6    | 13 | 3  | 5  | 4  |    |  |  |
| B3KQQ3_HUMAN | B3KQQ3_HUMAN   | B3KQQ3 | cDNA PSEC0016 fis, clone NT2RM1001076, highly similar to Procollagen-1 | 12.6 | 13 | 9  |    | 4  |    |  |  |
| B1PL87_HUMAN | B1PL87_HUMAN   | B1PL87 | Bid (Fragment)                                                         | 22.1 | 13 | 13 |    |    |    |  |  |
| B4DZC0_HUMAN | B4DZC0_HUMAN   | B4DZC0 | cDNA FLJ51771, highly similar to SWI/SNF-related matrix-associatedacti | 4.72 | 12 |    |    |    | 13 |  |  |

|              |              |        |                                                                        |      |    |    |   |    |    |  |  |
|--------------|--------------|--------|------------------------------------------------------------------------|------|----|----|---|----|----|--|--|
| O76046_HUMAN | SKI2W        | O76046 | Putative RNA helicase Ski2w                                            | 7.87 | 12 | 1  |   |    | 12 |  |  |
| A8K548_HUMAN | A8K548_HUMAN | A8K548 | cDNA FLJ75008, highly similar to Homo sapiens proline-, glutamic acid- | 4.6  | 12 |    |   |    | 12 |  |  |
| A8K586_HUMAN | A8K586_HUMAN | A8K586 | cDNA FLJ76822, highly similar to Homo sapiens adaptor-related protein  | 6.03 | 12 |    | 2 | 3  | 7  |  |  |
| A8K8K1_HUMAN | A8K8K1_HUMAN | A8K8K1 | cDNA FLJ76936, highly similar to Homo sapiens RNA terminal phosphate c | 10.1 | 12 | 5  | 1 |    | 7  |  |  |
| B4DP09_HUMAN | B4DP09_HUMAN | B4DP09 | cDNA FLJ53072, highly similar to Calponin-3                            | 18.4 | 12 | 4  | 1 |    | 7  |  |  |
| B4DFP1_HUMAN | B4DFP1_HUMAN | B4DFP1 | cDNA FLJ51818, highly similar to Phosphoglucomutase-1 (EC 5.4.2.2)     | 11.7 | 12 | 10 | 1 |    | 2  |  |  |
| A8K3E4_HUMAN | A8K3E4_HUMAN | A8K3E4 | cDNA FLJ78367, highly similar to Homo sapiens fibrinogen, A alpha poly | 11.8 | 12 |    |   | 12 |    |  |  |
| B2RCX0_HUMAN | B2RCX0_HUMAN | B2RCX0 | cDNA, FLJ96345, Homo sapiens SET translocation (myeloid leukemia-assoc | 13.4 | 12 | 1  | 5 | 6  |    |  |  |
| B3KTX4_HUMAN | B3KTX4_HUMAN | B3KTX4 | cDNA FLJ38923 fis, clone NT2NE2011823, highly similar to Dynactin subu | 16.7 | 12 | 9  |   | 3  |    |  |  |
| Q53HG7_HUMAN | Q53HG7_HUMAN | Q53HG7 | Cortactin isoform a variant (Fragment)                                 | 8    | 12 | 3  | 7 | 2  |    |  |  |
| A8K5J8_HUMAN | A8K5J8_HUMAN | A8K5J8 | cDNA FLJ75066, highly similar to Homo sapiens complement component 1,  | 7.38 | 12 | 10 | 2 | 1  |    |  |  |
| A8KAP9_HUMAN | A8KAP9_HUMAN | A8KAP9 | cDNA FLJ78448, highly similar to Homo sapiens argininosuccinate synthe | 9.22 | 12 | 15 |   |    |    |  |  |
| A8KAH7_HUMAN | A8KAH7_HUMAN | A8KAH7 | cDNA FLJ75444, highly similar to Homo sapiens protein kinase, cAMP-dep | 17.6 | 11 |    |   |    | 11 |  |  |
| B4DUI2_HUMAN | B4DUI2_HUMAN | B4DUI2 | cDNA FLJ61415, highly similar to Protein kinase C and casein kinase su | 9.26 | 11 | 1  | 1 |    | 10 |  |  |

|              |              |        |                                                                        |      |    |    |    |   |    |  |  |
|--------------|--------------|--------|------------------------------------------------------------------------|------|----|----|----|---|----|--|--|
| A8K4I1_HUMAN | A8K4I1_HUMAN | A8K4I1 | cDNA FLJ75404                                                          | 10.1 | 11 |    | 1  |   | 10 |  |  |
| B2R7B5_HUMAN | B2R7B5_HUMAN | B2R7B5 | cDNA, FLJ93365, highly similar to Homo sapiens KH domain containing, R | 5.42 | 11 | 1  |    | 1 | 9  |  |  |
| B3KMR5_HUMAN | B3KMR5_HUMAN | B3KMR5 | cDNA FLJ12434 fis, clone NT2RM1000037, highly similar to Homo sapiens  | 3.47 | 11 | 2  | 1  |   | 8  |  |  |
| B4DF00_HUMAN | B4DF00_HUMAN | B4DF00 | cDNA FLJ53308, highly similar to 2-oxoglutarate dehydrogenase E1 compo | 2.67 | 11 | 3  |    | 6 | 2  |  |  |
| B4DLB8_HUMAN | B4DLB8_HUMAN | B4DLB8 | cDNA FLJ52205, highly similar to Beta-1,4-galactosyltransferase 1 (EC  | 9.3  | 11 | 6  | 1  | 3 | 2  |  |  |
| B4DSX6_HUMAN | B4DSX6_HUMAN | B4DSX6 | cDNA FLJ57427, highly similar to Glycogenin-1 (EC 2.4.1.186)           | 15.5 | 11 | 9  | 1  |   | 2  |  |  |
| B2R6U8_HUMAN | B2R6U8_HUMAN | B2R6U8 | cDNA, FLJ93125, highly similar to Homo sapiens cleavage and polyadenyl | 23.8 | 11 | 2  |    | 9 |    |  |  |
| A8K2L6_HUMAN | A8K2L6_HUMAN | A8K2L6 | Annexin                                                                | 17.1 | 11 | 2  |    | 9 |    |  |  |
| B2RAQ9_HUMAN | B2RAQ9_HUMAN | B2RAQ9 | Proteasome subunit beta type (EC 3.4.25.1)                             | 9.03 | 11 | 2  |    | 9 |    |  |  |
| B7Z4S4_HUMAN | B7Z4S4_HUMAN | B7Z4S4 | cDNA FLJ52567, highly similar to Renin receptor                        | 13.5 | 11 | 7  |    | 4 |    |  |  |
| B4DN31_HUMAN | B4DN31_HUMAN | B4DN31 | cDNA FLJ55809                                                          | 11.5 | 11 |    | 11 |   |    |  |  |
| B3KQJ0_HUMAN | B3KQJ0_HUMAN | B3KQJ0 | cDNA FLJ90530 fis, clone NT2RP4002187, highly similar to Homo sapiens  | 9.94 | 11 | 6  | 5  |   |    |  |  |
| B2RE46_HUMAN | B2RE46_HUMAN | B2RE46 | cDNA, FLJ96923, highly similar to Homo sapiens ribophorin II (RPN2), m | 6.81 | 11 | 7  | 4  |   |    |  |  |
| B2R5J8_HUMAN | B2R5J8_HUMAN | B2R5J8 | cDNA, FLJ92501, highly similar to Homo sapiens chemokine (C-C motif) 1 | 35.2 | 11 | 11 |    |   |    |  |  |

|              |              |        |                                                                        |      |    |    |   |   |    |  |  |
|--------------|--------------|--------|------------------------------------------------------------------------|------|----|----|---|---|----|--|--|
| H0UI95_HUMAN | hCG_2044836  | H0UI95 | HCG2044836, isoform CRA_a                                              | 12.6 | 11 | 11 |   |   |    |  |  |
| B3KY63_HUMAN | B3KY63_HUMAN | B3KY63 | cDNA FLJ16830 fis, clone UTERU3022536, highly similar to Chromodomain  | 3.39 | 10 |    |   |   | 10 |  |  |
| A8K2X4_HUMAN | A8K2X4_HUMAN | A8K2X4 | cDNA FLJ75401, highly similar to Homo sapiens endoglin (Osler-Rendu-We | 11.2 | 10 |    |   |   | 10 |  |  |
| B3KMC9_HUMAN | B3KMC9_HUMAN | B3KMC9 | cDNA FLJ10711 fis, clone NT2RP3000917, highly similar to 5'-3' exoribo | 8.32 | 10 |    |   | 3 | 8  |  |  |
| B7Z7Y3_HUMAN | B7Z7Y3_HUMAN | B7Z7Y3 | cDNA FLJ61618, highly similar to Discoidin, CUB and LCCL domain-contai | 6.13 | 10 | 1  | 2 |   | 8  |  |  |
| A8K4T9_HUMAN | A8K4T9_HUMAN | A8K4T9 | cDNA FLJ77421, highly similar to Homo sapiens autoantigen p542 mRNA    | 18.2 | 10 | 1  | 1 |   | 8  |  |  |
| B4DJW8_HUMAN | B4DJW8_HUMAN | B4DJW8 | cDNA FLJ55697, highly similar to Protein transport protein Sec23B      | 8.01 | 10 | 3  |   |   | 7  |  |  |
| A8K897_HUMAN | A8K897_HUMAN | A8K897 | cDNA FLJ78686, highly similar to Homo sapiens nucleoporin 93kDa (NUP93 | 5.86 | 10 | 1  |   | 3 | 6  |  |  |
| A8K0C2_HUMAN | A8K0C2_HUMAN | A8K0C2 | cDNA FLJ75950                                                          | 11   | 10 |    | 1 | 4 | 5  |  |  |
| B2RDD7_HUMAN | B2RDD7_HUMAN | B2RDD7 | cDNA, FLJ96564, highly similar to Homo sapiens SKB1 homolog (S. pombe) | 4.4  | 10 | 3  |   | 3 | 5  |  |  |
| B2R9L6_HUMAN | B2R9L6_HUMAN | B2R9L6 | cDNA, FLJ94450, highly similar to Homo sapiens cyclin-dependent kinase | 6.45 | 10 |    |   |   | 5  |  |  |
| CLU_HUMAN    | CLUH         | O75153 | Clustered mitochondria protein homolog                                 | 2.22 | 10 | 2  |   | 4 | 4  |  |  |
| B4DW31_HUMAN | B4DW31_HUMAN | B4DW31 | cDNA FLJ54186, highly similar to Nuclear receptor-binding protein      | 8.16 | 10 | 3  |   | 3 | 4  |  |  |
| PIPSL_HUMAN  | PIPSL        | A2A3N6 | Putative PIP5K1A and PSMD4-like protein (PIP5K1A-PSMD4)                | 3.13 | 10 | 3  |   | 3 | 4  |  |  |

|              |               |        |                                                                        |      |    |    |   |   |   |  |  |
|--------------|---------------|--------|------------------------------------------------------------------------|------|----|----|---|---|---|--|--|
| B3KSP9_HUMAN | B3KSP9_HUMAN  | B3KSP9 | cDNA FLJ36765 fis, clone 3NB691000191                                  | 6.45 | 10 | 4  |   | 3 | 3 |  |  |
| B2RDT8_HUMAN | B2RDT8_HUMAN  | B2RDT8 | cDNA, FLJ96764, highly similar to Homo sapiens sorting nexin 8 (SNX8), | 11.8 | 10 | 4  | 2 | 1 | 3 |  |  |
| B2R6N0_HUMAN | B2R6N0_HUMAN  | B2R6N0 | cDNA, FLJ93029, highly similar to Homo sapiens COP9 constitutive photo | 10.4 | 10 | 5  |   | 3 | 2 |  |  |
| B2R679_HUMAN | B2R679_HUMAN  | B2R679 | cDNA, FLJ92825, highly similar to Homo sapiens SAR1a gene homolog 1 (S | 11.6 | 10 | 3  | 3 | 2 | 2 |  |  |
| A0MSJ5_HUMAN | A0MSJ5_HUMAN  | A0MSJ5 | Sodium-ascorbic acid transporter 2                                     | 6.77 | 10 | 9  |   |   | 1 |  |  |
| B4DVA7_HUMAN | B4DVA7_HUMAN  | B4DVA7 | Beta-hexosaminidase (EC 3.2.1.52)                                      | 8.33 | 10 | 1  | 8 |   |   |  |  |
| B7Z5L6_HUMAN | B7Z5L6_HUMAN  | B7Z5L6 | cDNA FLJ54723, highly similar to Poly (ADP-ribose) polymerase 9 (EC 2. | 8.37 | 10 | 12 |   |   |   |  |  |
| MROH1_HUMAN  | MROH1         | Q8NDA8 | Maestro heat-like repeat-containing protein family member 1 (HEAT repe | 3.6  | 10 | 10 |   |   |   |  |  |
| Q7Z3K9_HUMAN | DKFZp781L0540 | Q7Z3K9 | Putative uncharacterized protein DKFZp781L0540 (Fragment)              | 4.51 | 9  | 1  |   | 1 | 8 |  |  |
| A8K6G9_HUMAN | A8K6G9_HUMAN  | A8K6G9 | cDNA FLJ76871, highly similar to Homo sapiens DEAH (Asp-Glu-Ala-His) b | 4.97 | 9  |    |   | 1 | 8 |  |  |
| B3KTC9_HUMAN | B3KTC9_HUMAN  | B3KTC9 | cDNA FLJ38075 fis, clone CTONG2015815, highly similar to F-box/LRR-rep | 4.52 | 9  | 1  |   |   | 8 |  |  |
| B2R960_HUMAN | B2R960_HUMAN  | B2R960 | cDNA, FLJ94230, highly similar to Homo sapiens thioredoxin-like 1 (TXN | 11.4 | 9  | 1  |   | 1 | 7 |  |  |
| B2RDP6_HUMAN | B2RDP6_HUMAN  | B2RDP6 | cDNA, FLJ96709, highly similar to Homo sapiens glutamate rich WD repea | 12.6 | 9  |    |   | 3 | 6 |  |  |
| Q8WVX7_HUMAN | Q8WVX7_HUMAN  | Q8WVX7 | Ribosomal protein S19 (Fragment)                                       | 21   | 9  | 2  |   | 1 | 6 |  |  |



|              |              |        |                                                                         |      |   |   |   |   |    |  |  |
|--------------|--------------|--------|-------------------------------------------------------------------------|------|---|---|---|---|----|--|--|
| B4DQE1_HUMAN | B4DQE1_HUMAN | B4DQE1 | Annexin                                                                 | 13.7 | 9 | 1 | 3 |   | 5  |  |  |
| B4DM85_HUMAN | B4DM85_HUMAN | B4DM85 | cDNA FLJ56002, highly similar to Kinesin-like protein KIF2              | 3.23 | 9 | 4 | 1 |   | 5  |  |  |
| B4DG42_HUMAN | B4DG42_HUMAN | B4DG42 | cDNA FLJ53753, highly similar to Myeloid-associated differentiation ma  | 9.82 | 9 | 2 | 4 | 1 | 2  |  |  |
| B4E2I9_HUMAN | B4E2I9_HUMAN | B4E2I9 | cDNA FLJ55486, highly similar to Semaphorin-3C                          | 6.89 | 9 | 7 |   |   | 2  |  |  |
| B7Z2B0_HUMAN | B7Z2B0_HUMAN | B7Z2B0 | cDNA FLJ53470, highly similar to Calcium/calmodulin-dependent protein   | 6.75 | 9 | 3 | 3 | 2 | 1  |  |  |
| OASL_HUMAN   | OASL         | Q15646 | 2'-5'-oligoadenylate synthase-like protein (2'-5'-OAS-related protein)  | 12.8 | 9 | 9 |   |   |    |  |  |
| E5KND7_HUMAN | E5KND7_HUMAN | E5KND7 | Mitochondrial elongation factor G                                       | 4.39 | 8 |   |   |   | 10 |  |  |
| B3KM58_HUMAN | B3KM58_HUMAN | B3KM58 | cDNA FLJ10358 fis, clone NT2RM2001238, highly similar to Glutaminase k  | 11.1 | 8 |   |   |   | 8  |  |  |
| A8KAQ5_HUMAN | A8KAQ5_HUMAN | A8KAQ5 | cDNA FLJ77404, highly similar to Homo sapiens small nuclear ribonucleo  | 8.47 | 8 | 1 |   | 1 | 7  |  |  |
| A4GW21_HUMAN | A4GW21_HUMAN | A4GW21 | Programmed cell death ligand 2                                          | 10.6 | 8 |   | 1 |   | 7  |  |  |
| B4DYP7_HUMAN | B4DYP7_HUMAN | B4DYP7 | cDNA FLJ55435, highly similar to Gamma-tubulin complex component 3      | 5.02 | 8 | 1 |   |   | 7  |  |  |
| Q53EL1_HUMAN | Q53EL1_HUMAN | Q53EL1 | Protein KIAA0196 variant (Fragment)                                     | 4.64 | 8 | 5 | 2 |   | 1  |  |  |
| A8K5T0_HUMAN | A8K5T0_HUMAN | A8K5T0 | cDNA FLJ75416, highly similar to Homo sapiens complement factor H (CFH) | 4.63 | 8 |   |   | 8 |    |  |  |
| B2RE24_HUMAN | B2RE24_HUMAN | B2RE24 | cDNA, FLJ96882, highly similar to Homo sapiens carbonic anhydrase XII   | 14.1 | 8 |   |   | 8 |    |  |  |

|              |              |        |                                                                        |      |   |   |   |   |   |  |  |
|--------------|--------------|--------|------------------------------------------------------------------------|------|---|---|---|---|---|--|--|
| B2RAY1_HUMAN | B2RAY1_HUMAN | B2RAY1 | cDNA, FLJ95184, highly similar to Homo sapiens signal transducing adap | 6.67 | 8 | 5 | 1 | 2 |   |  |  |
| B4E3I3_HUMAN | B4E3I3_HUMAN | B4E3I3 | cDNA FLJ59614, highly similar to Ubiquitin fusion degradation protein  | 7.94 | 8 | 7 |   | 1 |   |  |  |
| Q5JB40_HUMAN | Q5JB40_HUMAN | Q5JB40 | Selectin-like protein                                                  | 1.68 | 8 | 7 |   | 1 |   |  |  |
| B4DTZ8_HUMAN | B4DTZ8_HUMAN | B4DTZ8 | cDNA FLJ52277, highly similar to Follistatin-related protein 1         | 9.56 | 8 | 5 | 2 |   |   |  |  |
| Q53FU3_HUMAN | Q53FU3_HUMAN | Q53FU3 | Coatomer protein complex, subunit zeta 1 variant (Fragment)            | 25.4 | 8 | 7 | 1 |   |   |  |  |
| D6W4Z6_HUMAN | hCG_23833    | D6W4Z6 | HCG23833, isoform CRA_b                                                | 10.2 | 8 | 8 |   |   |   |  |  |
| D6RGV2_HUMAN | IL7R         | D6RGV2 | Interleukin-7 receptor subunit alpha                                   | 11.5 | 8 | 7 |   |   |   |  |  |
| A8K245_HUMAN | A8K245_HUMAN | A8K245 | cDNA FLJ75441, highly similar to Homo sapiens vaccinia related kinase  | 13.6 | 7 |   |   |   | 8 |  |  |
| B2R9K6_HUMAN | B2R9K6_HUMAN | B2R9K6 | cDNA, FLJ94436, highly similar to Homo sapiens platelet derived growth | 11.6 | 7 |   |   |   | 7 |  |  |
| Q53GD7_HUMAN | Q53GD7_HUMAN | Q53GD7 | FUS interacting protein (Serine-arginine rich) 1 isoform 2 variant (Fr | 19.1 | 7 |   |   |   | 7 |  |  |
| B2RDN3_HUMAN | B2RDN3_HUMAN | B2RDN3 | cDNA, FLJ96692, highly similar to Homo sapiens nucleotide binding prot | 8.49 | 7 |   |   | 2 | 5 |  |  |
| A0JLQ5_HUMAN | BXDC2        | A0JLQ5 | BXDC2 protein (Fragment)                                               | 8.06 | 7 | 3 |   |   | 5 |  |  |
| B2RBP3_HUMAN | B2RBP3_HUMAN | B2RBP3 | cDNA, FLJ95615, highly similar to Homo sapiens ubiquitin-activating en | 4.54 | 7 | 3 |   |   | 4 |  |  |
| B2R6H7_HUMAN | B2R6H7_HUMAN | B2R6H7 | cDNA, FLJ92955, highly similar to Homo sapiens transportin-SR (TRN-SR) | 3.47 | 7 | 2 | 1 | 1 | 3 |  |  |
| A8K5L5_HUMAN | A8K5L5_HUMAN | A8K5L5 | cDNA FLJ75689, highly similar to Homo sapiens poliovirus receptor-rela | 8.35 | 7 | 1 | 3 |   | 3 |  |  |

|              |              |        |                                                                        |      |   |   |   |   |   |  |  |
|--------------|--------------|--------|------------------------------------------------------------------------|------|---|---|---|---|---|--|--|
| B4DKC1_HUMAN | B4DKC1_HUMAN | B4DKC1 | cDNA FLJ53349, highly similar to Transmembrane 9 superfamily protein m | 4.66 | 7 | 4 |   |   | 3 |  |  |
| B4DVP2_HUMAN | B4DVP2_HUMAN | B4DVP2 | cDNA FLJ57208, highly similar to 5'-AMP-activated protein kinase subun | 11.2 | 7 | 4 |   |   | 3 |  |  |
| B2RB07_HUMAN | B2RB07_HUMAN | B2RB07 | cDNA, FLJ95243, highly similar to Homo sapiens ubiquitin carboxyl-term | 8.51 | 7 | 5 |   |   | 2 |  |  |
| B4E1E2_HUMAN | B4E1E2_HUMAN | B4E1E2 | cDNA FLJ61530, highly similar to Hepatocyte growth factor-regulated ty | 3.33 | 7 | 2 | 2 | 2 | 1 |  |  |
| B3KM36_HUMAN | B3KM36_HUMAN | B3KM36 | cDNA FLJ10153 fis, clone HEMBA1003417, highly similar to BAG family mo | 15.6 | 7 | 2 | 3 | 1 | 1 |  |  |
| Q59FB9_HUMAN | Q59FB9_HUMAN | Q59FB9 | Toll interacting protein variant (Fragment)                            | 7.67 | 7 | 4 | 2 | 1 | 1 |  |  |
| Q59FC3_HUMAN | Q59FC3_HUMAN | Q59FC3 | G protein-coupled receptor kinase interactor 1 variant (Fragment)      | 3.88 | 7 | 6 |   | 1 | 1 |  |  |
| B4DKQ5_HUMAN | B4DKQ5_HUMAN | B4DKQ5 | cDNA FLJ54710, highly similar to Target of Myb protein 1               | 5.79 | 7 | 5 | 1 |   | 1 |  |  |
| B4DG62_HUMAN | B4DG62_HUMAN | B4DG62 | cDNA FLJ56506, highly similar to Hexokinase-1 (EC 2.7.1.1)             | 4.7  | 7 | 4 | 1 |   | 1 |  |  |
| T3HPD_HUMAN  | L3HYDPH      | Q96EM0 | Trans-L-3-hydroxyproline dehydratase (EC 4.2.1.77) (Trans-3-hydroxy-l- | 8.47 | 7 | 6 |   |   | 1 |  |  |
| A8K9W7_HUMAN | A8K9W7_HUMAN | A8K9W7 | cDNA FLJ77440, highly similar to Homo sapiens general transcription fa | 5.21 | 7 |   |   | 7 |   |  |  |
| Q96K68_HUMAN | Q96K68_HUMAN | Q96K68 | cDNA FLJ14473 fis, clone MAMMA1001080, highly similar to Homo sapiens  | 8.3  | 7 |   |   | 7 |   |  |  |
| B4DXF3_HUMAN | B4DXF3_HUMAN | B4DXF3 | cDNA FLJ57650, highly similar to Bleomycin hydrolase (EC 3.4.22.40)    | 6.25 | 7 | 2 |   | 4 |   |  |  |
| B4DVT6_HUMAN | B4DVT6_HUMAN | B4DVT6 | cDNA FLJ52170, highly similar to Homo sapiens pyrroline-5-carboxylate  | 14.2 | 7 | 5 |   | 2 |   |  |  |

|              |              |        |                                                                        |      |   |   |   |   |   |  |  |
|--------------|--------------|--------|------------------------------------------------------------------------|------|---|---|---|---|---|--|--|
| B2R7T2_HUMAN | B2R7T2_HUMAN | B2R7T2 | cDNA, FLJ93591, highly similar to Homo sapiens transforming growth fac | 8.94 | 7 | 6 |   | 1 |   |  |  |
| B7Z6S9_HUMAN | B7Z6S9_HUMAN | B7Z6S9 | cDNA FLJ56157, highly similar to Glucosylceramidase (EC 3.2.1.45)      | 5.96 | 7 | 3 | 4 |   |   |  |  |
| Q9UHS8_HUMAN | Q9UHS8_HUMAN | Q9UHS8 | PRO1975                                                                | 9.16 | 7 | 4 | 3 |   |   |  |  |
| B4E0Z6_HUMAN | B4E0Z6_HUMAN | B4E0Z6 | cDNA FLJ59809, highly similar to Bone marrow stromal antigen 2         | 6.94 | 7 | 6 | 1 |   |   |  |  |
| B2R6N9_HUMAN | B2R6N9_HUMAN | B2R6N9 | cDNA, FLJ93042, highly similar to Homo sapiens signal sequence recepto | 11.9 | 7 | 6 | 1 |   |   |  |  |
| 5NT3A_HUMAN  | NT5C3A       | Q9H0P0 | Cytosolic 5'-nucleotidase 3A (EC 3.1.3.5) (Cytosolic 5'-nucleotidase 3 | 13.1 | 7 | 8 |   |   |   |  |  |
| B4DP80_HUMAN | B4DP80_HUMAN | B4DP80 | cDNA FLJ56357, highly similar to Homo sapiens apolipoprotein A-I bindi | 16.9 | 7 | 7 |   |   |   |  |  |
| B3KX16_HUMAN | B3KX16_HUMAN | B3KX16 | cDNA FLJ44469 fis, clone UTERU2026090, highly similar to Cartilage-ass | 11.3 | 7 | 7 |   |   |   |  |  |
| A8KAM8_HUMAN | A8KAM8_HUMAN | A8KAM8 | Tyrosine-protein kinase receptor (EC 2.7.10.1)                         | 3.98 | 7 | 7 |   |   |   |  |  |
| B4DRB1_HUMAN | B4DRB1_HUMAN | B4DRB1 | cDNA FLJ50735, highly similar to Calsyntenin-3                         | 4.71 | 7 | 7 |   |   |   |  |  |
| A8K946_HUMAN | A8K946_HUMAN | A8K946 | mRNA cap guanine-N7 methyltransferase (EC 2.1.1.56)                    | 7.74 | 6 |   |   |   | 6 |  |  |
| B2RB06_HUMAN | B2RB06_HUMAN | B2RB06 | cDNA, FLJ95242, highly similar to Homo sapiens L-3-hydroxyacyl-Coenzym | 11.1 | 6 |   |   | 1 | 5 |  |  |
| Q53EQ3_HUMAN | Q53EQ3_HUMAN | Q53EQ3 | Tubulin, gamma complex associated protein 2 variant (Fragment)         | 9.77 | 6 | 1 |   |   | 5 |  |  |
| B7Z4Z2_HUMAN | B7Z4Z2_HUMAN | B7Z4Z2 | cDNA FLJ52440, highly similar to Lysosomal acid phosphatase (EC 3.1.3. | 8.06 | 6 |   | 2 |   | 4 |  |  |

|              |              |        |                                                                         |      |   |   |   |   |   |  |  |
|--------------|--------------|--------|-------------------------------------------------------------------------|------|---|---|---|---|---|--|--|
| Q59GY3_HUMAN | Q59GY3_HUMAN | Q59GY3 | Arginine/serine-rich splicing factor 6 variant (Fragment)               | 13.3 | 6 | 1 | 1 |   | 4 |  |  |
| B7Z561_HUMAN | B7Z561_HUMAN | B7Z561 | cDNA FLJ53154, highly similar to Neutral amino acid transporter A       | 5.31 | 6 | 1 | 3 | 2 | 3 |  |  |
| B7Z920_HUMAN | B7Z920_HUMAN | B7Z920 | cDNA FLJ61714, highly similar to Tripeptidyl-peptidase 2 (EC 3.4.14.10) | 2.53 | 6 |   | 1 | 2 | 3 |  |  |
| A8K885_HUMAN | A8K885_HUMAN | A8K885 | cDNA FLJ77179, highly similar to Homo sapiens sorting nexin 6 (SNX6) m  | 6.4  | 6 | 2 |   | 1 | 3 |  |  |
| Q59EC0_HUMAN | Q59EC0_HUMAN | Q59EC0 | Adenosine deaminase, RNA-specific isoform ADAR-a variant (Fragment)     | 5.06 | 6 | 3 |   |   | 3 |  |  |
| A8K923_HUMAN | A8K923_HUMAN | A8K923 | cDNA FLJ78690, highly similar to Homo sapiens protein phosphatase 4, r  | 2.36 | 6 | 1 | 1 | 2 | 2 |  |  |
| Q69YP2_HUMAN | DKFZp762K123 | Q69YP2 | Putative uncharacterized protein DKFZp762K123 (Fragment)                | 5.65 | 6 | 4 |   |   | 2 |  |  |
| B4DND6_HUMAN | B4DND6_HUMAN | B4DND6 | cDNA FLJ55804, highly similar to COP9 signalosome complex subunit 1     | 3.73 | 6 | 2 |   | 3 | 1 |  |  |
| A4D0R2_HUMAN | SYPL         | A4D0R2 | Synaptophysin-like 1, isoform CRA_b (Synaptophysin-like protein)        | 4.56 | 6 | 2 | 3 | 2 | 1 |  |  |
| Q9NXW1_HUMAN | Q9NXW1_HUMAN | Q9NXW1 | BJ-HCC-24 tumor antigen (CDNA FLJ20030 fis, clone ADSU02156)            | 5.83 | 6 | 2 |   | 2 | 1 |  |  |
| B4DXC4_HUMAN | B4DXC4_HUMAN | B4DXC4 | cDNA FLJ58636, moderately similar to Atlantin                           | 3.63 | 6 | 2 | 3 |   | 1 |  |  |
| B4E0U7_HUMAN | B4E0U7_HUMAN | B4E0U7 | cDNA FLJ54264, highly similar to Exocyst complex component 5            | 3.73 | 6 |   | 2 | 4 |   |  |  |
| A8K8N5_HUMAN | A8K8N5_HUMAN | A8K8N5 | Ubiquitin carboxyl-terminal hydrolase (EC 3.4.19.12)                    | 2.77 | 6 |   | 2 | 3 |   |  |  |
| B3KQF4_HUMAN | B3KQF4_HUMAN | B3KQF4 | cDNA FLJ90373 fis, clone NT2RP2004606, highly similar to Metalloprotei  | 18.8 | 6 | 3 |   | 3 |   |  |  |

|              |              |        |                                                                        |      |   |   |   |   |   |  |  |
|--------------|--------------|--------|------------------------------------------------------------------------|------|---|---|---|---|---|--|--|
| A8K6L3_HUMAN | A8K6L3_HUMAN | A8K6L3 | cDNA FLJ76883, highly similar to Homo sapiens FKSG44 gene (FKSG44), mR | 12.7 | 6 | 5 | 1 |   |   |  |  |
| A8K2H4_HUMAN | A8K2H4_HUMAN | A8K2H4 | cDNA FLJ78235                                                          | 15   | 6 | 4 | 1 |   |   |  |  |
| B4DJW1_HUMAN | B4DJW1_HUMAN | B4DJW1 | cDNA FLJ54329, highly similar to Aconitate hydratase, mitochondrial(EC | 2.58 | 6 | 6 |   |   |   |  |  |
| Q59GW7_HUMAN | Q59GW7_HUMAN | Q59GW7 | Replication factor C 5 isoform 1 variant (Fragment)                    | 10.3 | 5 |   |   |   | 5 |  |  |
| A8K670_HUMAN | A8K670_HUMAN | A8K670 | cDNA FLJ75703, highly similar to Homo sapiens nitric oxide synthase in | 9.97 | 5 |   |   |   | 5 |  |  |
| NAKD2_HUMAN  | NADK2        | Q4G0N4 | NAD kinase 2, mitochondrial (EC 2.7.1.23) (Mitochondrial NAD kinase) ( | 7.01 | 5 |   |   |   | 5 |  |  |
| B3KN45_HUMAN | B3KN45_HUMAN | B3KN45 | cDNA FLJ13521 fis, clone PLACE1005876, highly similar to Cleavage and  | 3.91 | 5 |   |   |   | 5 |  |  |
| Q52NV4_HUMAN | HRS          | Q52NV4 | Histidyl-tRNA synthetase                                               | 6.48 | 5 |   |   | 1 | 4 |  |  |
| A8K905_HUMAN | A8K905_HUMAN | A8K905 | cDNA FLJ77615, highly similar to Homo sapiens nucleolar complex associ | 3.5  | 5 | 1 |   |   | 4 |  |  |
| B7Z8G2_HUMAN | B7Z8G2_HUMAN | B7Z8G2 | cDNA FLJ58213, highly similar to FK506-binding protein 5 (EC 5.2.1.8)  | 6.9  | 5 | 1 |   |   | 4 |  |  |
| B4DU42_HUMAN | B4DU42_HUMAN | B4DU42 | cDNA FLJ56153, highly similar to Homo sapiens transforming growth fact | 3.74 | 5 |   |   | 2 | 3 |  |  |
| B7Z323_HUMAN | B7Z323_HUMAN | B7Z323 | cDNA FLJ52497, highly similar to Protein NDRG3                         | 5.3  | 5 | 2 |   |   | 3 |  |  |
| B4DLT2_HUMAN | B4DLT2_HUMAN | B4DLT2 | cDNA FLJ56637, highly similar to Nuclear pore complex protein Nup155   | 2.14 | 5 | 2 |   |   | 3 |  |  |
| A9UK01_HUMAN | A9UK01_HUMAN | A9UK01 | Rho GTPase activating protein                                          | 6.49 | 5 | 4 |   |   | 2 |  |  |

|              |                |        |                                                                        |      |   |   |   |   |   |  |  |
|--------------|----------------|--------|------------------------------------------------------------------------|------|---|---|---|---|---|--|--|
| B2RAU5_HUMAN | B2RAU5_HUMAN   | B2RAU5 | Sorting nexin                                                          | 2.35 | 5 | 3 |   |   | 2 |  |  |
| A8K2Z9_HUMAN | A8K2Z9_HUMAN   | A8K2Z9 | Receptor-type tyrosine-protein phosphatase (EC 3.1.3.48)               | 3.89 | 5 | 3 |   |   | 2 |  |  |
| B3KML1_HUMAN | B3KML1_HUMAN   | B3KML1 | cDNA FLJ11308 fis, clone PLACE1010074, highly similar to Sorting nexin | 7.51 | 5 | 3 |   | 1 | 1 |  |  |
| Q59EZ3_HUMAN | Q59EZ3_HUMAN   | Q59EZ3 | Insulin-like growth factor 2 receptor variant (Fragment)               | 1.28 | 5 | 4 |   |   | 1 |  |  |
| A6XNE2_HUMAN | A6XNE2_HUMAN   | A6XNE2 | Complement factor D preproprotein                                      | 12.3 | 5 |   |   | 5 |   |  |  |
| Q6N094_HUMAN | DKFZp686O01196 | Q6N094 | Putative uncharacterized protein DKFZp686O01196                        | 8.12 | 5 | 2 |   | 4 |   |  |  |
| B7Z1V1_HUMAN | B7Z1V1_HUMAN   | B7Z1V1 | cDNA FLJ50123                                                          | 6.86 | 5 | 1 |   | 4 |   |  |  |
| B2R7M1_HUMAN | B2R7M1_HUMAN   | B2R7M1 | cDNA, FLJ93507, highly similar to Homo sapiens ATPase, H+ transporting | 14   | 5 | 3 | 3 |   |   |  |  |
| B2R6A3_HUMAN | B2R6A3_HUMAN   | B2R6A3 | cDNA, FLJ92860, highly similar to Homo sapiens solute carrier family 9 | 7.82 | 5 | 3 | 3 |   |   |  |  |
| A6QKW0_HUMAN | SHINC3         | A6QKW0 | SHINC3                                                                 | 4.86 | 5 | 2 | 3 |   |   |  |  |
| A8K249_HUMAN | A8K249_HUMAN   | A8K249 | Caspase                                                                | 12.6 | 5 | 5 |   |   |   |  |  |
| Q9UG64_HUMAN | DKFZp586I1223  | Q9UG64 | Putative uncharacterized protein DKFZp586I1223 (Fragment)              | 12.7 | 4 |   |   |   | 4 |  |  |
| VPS51_HUMAN  | VPS51          | Q9UID3 | Vacuolar protein sorting-associated protein 51 homolog (Another new ge | 5.88 | 4 |   |   |   | 4 |  |  |
| A8K5L4_HUMAN | A8K5L4_HUMAN   | A8K5L4 | cDNA FLJ76843, highly similar to Homo sapiens guanine nucleotide bindi | 6.95 | 4 |   |   |   | 4 |  |  |

|              |               |        |                                                                        |      |   |   |  |   |   |  |  |
|--------------|---------------|--------|------------------------------------------------------------------------|------|---|---|--|---|---|--|--|
| B4DSH1_HUMAN | B4DSH1_HUMAN  | B4DSH1 | cDNA FLJ51295, highly similar to Cell division cycle 5-like protein    | 3.23 | 4 |   |  |   | 4 |  |  |
| B4DG11_HUMAN | B4DG11_HUMAN  | B4DG11 | cDNA FLJ55382, highly similar to Hsp70-binding protein 1               | 6.67 | 4 |   |  |   | 4 |  |  |
| D3DRP5_HUMAN | C9orf19       | D3DRP5 | Chromosome 9 open reading frame 19, isoform CRA_a (Fragment)           | 7.41 | 4 |   |  |   | 4 |  |  |
| B2R7R5_HUMAN | B2R7R5_HUMAN  | B2R7R5 | cDNA, FLJ93570, highly similar to Homo sapiens phosphoribosyl pyrophos | 7.59 | 4 |   |  | 1 | 3 |  |  |
| B3KTT0_HUMAN | B3KTT0_HUMAN  | B3KTT0 | cDNA FLJ38675 fis, clone IMR322000243, highly similar to Nucleoporin N | 10.8 | 4 |   |  | 1 | 3 |  |  |
| B4DW43_HUMAN | B4DW43_HUMAN  | B4DW43 | cDNA FLJ56162, highly similar to N-acetylgalactosamine kinase (EC 2.7. | 5.3  | 4 | 1 |  | 1 | 2 |  |  |
| Q8TF11_HUMAN | Q8TF11_HUMAN  | Q8TF11 | Vacuolar proton pump subunit SFD alpha isoform                         | 6.51 | 4 | 2 |  |   | 2 |  |  |
| B4DKS0_HUMAN | B4DKS0_HUMAN  | B4DKS0 | cDNA FLJ53381, highly similar to Monocarboxylate transporter 1         | 6.25 | 4 | 4 |  |   | 1 |  |  |
| A8KA83_HUMAN | A8KA83_HUMAN  | A8KA83 | cDNA FLJ78586, highly similar to Homo sapiens VAMP (vesicle-associated | 4.96 | 4 | 3 |  |   | 1 |  |  |
| A8K5A4_HUMAN | A8K5A4_HUMAN  | A8K5A4 | cDNA FLJ76826, highly similar to Homo sapiens ceruloplasmin (ferroxida | 3.94 | 4 |   |  | 4 |   |  |  |
| A8K417_HUMAN | A8K417_HUMAN  | A8K417 | cDNA FLJ78087, highly similar to Homo sapiens homogentisate 1,2-dioxyg | 4.72 | 4 |   |  | 4 |   |  |  |
| B2R8N1_HUMAN | B2R8N1_HUMAN  | B2R8N1 | cDNA, FLJ93976, highly similar to Homo sapiens COP9 homolog (COP9), mR | 13.4 | 4 | 2 |  | 2 |   |  |  |
| B4DWB1_HUMAN | B4DWB1_HUMAN  | B4DWB1 | Protein arginine N-methyltransferase                                   | 2.71 | 4 | 2 |  | 2 |   |  |  |
| Q5HYL6_HUMAN | DKFZp686E1899 | Q5HYL6 | Putative uncharacterized protein DKFZp686E1899                         | 3.98 | 4 | 3 |  | 1 |   |  |  |



|              |              |        |                                                                        |      |   |   |   |  |   |  |  |
|--------------|--------------|--------|------------------------------------------------------------------------|------|---|---|---|--|---|--|--|
| B7Z965_HUMAN | B7Z965_HUMAN | B7Z965 | cDNA FLJ56337, highly similar to High mobility group protein B1        | 8.62 | 4 | 1 | 4 |  |   |  |  |
| B7Z2G0_HUMAN | B7Z2G0_HUMAN | B7Z2G0 | cDNA FLJ54266, highly similar to G-protein coupled receptor family C g | 4.56 | 4 |   | 4 |  |   |  |  |
| APMAP_HUMAN  | APMAP        | Q9HDC9 | Adipocyte plasma membrane-associated protein (Protein BSCv)            | 2.88 | 4 | 1 | 3 |  |   |  |  |
| A8K4S9_HUMAN | A8K4S9_HUMAN | A8K4S9 | Signal transducer and activator of transcription                       | 3.54 | 4 | 6 |   |  |   |  |  |
| Q658S9_HUMAN | DKFZp666I134 | Q658S9 | Putative uncharacterized protein DKFZp666I134 (Fragment)               | 8.67 | 4 | 4 |   |  |   |  |  |
| B4DWL1_HUMAN | B4DWL1_HUMAN | B4DWL1 | cDNA FLJ59240, highly similar to Far upstream element-binding protein  | 3.43 | 4 | 4 |   |  |   |  |  |
| A8K6H1_HUMAN | A8K6H1_HUMAN | A8K6H1 | cDNA FLJ76662, highly similar to Homo sapiens type 1 tumor necrosis fa | 4.04 | 4 | 4 |   |  |   |  |  |
| B4DRC7_HUMAN | B4DRC7_HUMAN | B4DRC7 | cDNA FLJ57829                                                          | 3.4  | 4 | 4 |   |  |   |  |  |
| B4DTX0_HUMAN | B4DTX0_HUMAN | B4DTX0 | cDNA FLJ60891, highly similar to Macrophage colony-stimulating factor  | 6.49 | 4 | 4 |   |  |   |  |  |
| Q59FU8_HUMAN | Q59FU8_HUMAN | Q59FU8 | Tumor necrosis factor receptor superfamily, member 6 isoform 1 variant | 4.14 | 4 | 4 |   |  |   |  |  |
| E5KN59_HUMAN | E5KN59_HUMAN | E5KN59 | Peptidyl-prolyl cis-trans isomerase D                                  | 4.59 | 3 |   |   |  | 4 |  |  |
| Q53GS0_HUMAN | Q53GS0_HUMAN | Q53GS0 | Nucleolar GTP-binding protein 1 (Fragment)                             | 2.05 | 3 |   |   |  | 3 |  |  |
| NELFB_HUMAN  | NELFB        | Q8WX92 | Negative elongation factor B (NELF-B) (Cofactor of BRCA1)              | 4.31 | 3 |   |   |  | 3 |  |  |
| B3KNC3_HUMAN | B3KNC3_HUMAN | B3KNC3 | cDNA FLJ14222 fis, clone NT2RP3003992, highly similar to Nucleolar com | 2.94 | 3 |   |   |  | 3 |  |  |

|              |              |        |                                                                         |      |   |   |   |   |   |  |  |
|--------------|--------------|--------|-------------------------------------------------------------------------|------|---|---|---|---|---|--|--|
| B3KP06_HUMAN | B3KP06_HUMAN | B3KP06 | cDNA FLJ30880 fis, clone FEBRA2004767, highly similar to Breast cancer  | 1.21 | 3 |   |   |   | 3 |  |  |
| B2RAR3_HUMAN | B2RAR3_HUMAN | B2RAR3 | Queuine tRNA-ribosyltransferase (EC 2.4.2.29)                           | 3.47 | 3 |   |   |   | 3 |  |  |
| B2RCP7_HUMAN | B2RCP7_HUMAN | B2RCP7 | cDNA, FLJ96197, highly similar to Homo sapiens connective tissue growt  | 6.3  | 3 |   |   |   | 3 |  |  |
| A8K9B2_HUMAN | A8K9B2_HUMAN | A8K9B2 | cDNA FLJ76725, highly similar to Homo sapiens L-2-hydroxyglutarate deh  | 4.97 | 3 |   |   |   | 3 |  |  |
| B4DE94_HUMAN | B4DE94_HUMAN | B4DE94 | cDNA FLJ57707, highly similar to Ketosamine-3-kinase (EC 2.7.1.-)       | 11   | 3 |   |   |   | 3 |  |  |
| B4DH44_HUMAN | B4DH44_HUMAN | B4DH44 | cDNA FLJ52538, highly similar to Dual specificity mitogen-activated pr  | 7.98 | 3 |   |   |   | 3 |  |  |
| B2RC50_HUMAN | B2RC50_HUMAN | B2RC50 | cDNA, FLJ95853, highly similar to Homo sapiens exosome component Rrp46  | 9.36 | 3 |   |   |   | 3 |  |  |
| B4DYF4_HUMAN | B4DYF4_HUMAN | B4DYF4 | cDNA FLJ56176, highly similar to Poly(A) polymerase alpha (EC 2.7.7.19) | 3.15 | 3 |   |   | 1 | 2 |  |  |
| B7ZL68_HUMAN | NRP2         | B7ZL68 | Neuropilin 2                                                            | 3.35 | 3 |   |   | 1 | 2 |  |  |
| B2R6E2_HUMAN | B2R6E2_HUMAN | B2R6E2 | cDNA, FLJ92910, highly similar to Homo sapiens programmed cell death 4  | 4.69 | 3 |   | 1 |   | 2 |  |  |
| B4E324_HUMAN | B4E324_HUMAN | B4E324 | cDNA FLJ60397, highly similar to Lysosomal protective protein (EC 3.4.  | 5.62 | 3 |   | 1 |   | 2 |  |  |
| B3KM47_HUMAN | B3KM47_HUMAN | B3KM47 | cDNA FLJ10273 fis, clone HEMBB1001137, highly similar to SEC23-interac  | 3.9  | 3 | 2 |   |   | 2 |  |  |
| D4YW74_HUMAN | TROPH        | D4YW74 | Polytrophin                                                             | 0.19 | 3 |   |   | 2 | 1 |  |  |
| B4DZ28_HUMAN | B4DZ28_HUMAN | B4DZ28 | cDNA FLJ53577, highly similar to pre-mRNA-splicing factor ATP-dependen  | 2.14 | 3 |   |   | 2 | 1 |  |  |
| B7Z4J7_HUMAN | B7Z4J7_HUMAN | B7Z4J7 | Gephyrin                                                                | 3.69 | 3 |   |   | 2 | 1 |  |  |

|              |              |        |                                                                         |      |   |   |   |   |   |  |  |
|--------------|--------------|--------|-------------------------------------------------------------------------|------|---|---|---|---|---|--|--|
| A8K9T8_HUMAN | A8K9T8_HUMAN | A8K9T8 | cDNA FLJ76106, highly similar to Homo sapiens neurolysin (metallopepti  | 3.55 | 3 |   |   | 2 | 1 |  |  |
| H0Y858_HUMAN | H0Y858_HUMAN | H0Y858 | Uncharacterized protein (Fragment)                                      | 2.02 | 3 | 1 | 1 |   | 1 |  |  |
| Q59G24_HUMAN | Q59G24_HUMAN | Q59G24 | Activated RNA polymerase II transcription cofactor 4 variant (Fragment) | 17.9 | 3 | 3 |   |   | 1 |  |  |
| B2R694_HUMAN | B2R694_HUMAN | B2R694 | cDNA, FLJ92849, highly similar to Homo sapiens lanosterol synthase (2,  | 2.05 | 3 |   |   | 3 |   |  |  |
| A8K651_HUMAN | A8K651_HUMAN | A8K651 | cDNA FLJ75700, highly similar to Homo sapiens complement component 1,   | 10.3 | 3 |   |   | 3 |   |  |  |
| B2R758_HUMAN | B2R758_HUMAN | B2R758 | cDNA, FLJ93295, highly similar to Homo sapiens glucosaminyl (N-acetyl)  | 4.11 | 3 |   |   | 3 |   |  |  |
| E5KMT6_HUMAN | E5KMT6_HUMAN | E5KMT6 | tRNA pseudouridine synthase (EC 5.4.99.-)                               | 2.51 | 3 | 1 |   | 2 |   |  |  |
| Q7Z426_HUMAN | Q7Z426_HUMAN | Q7Z426 | Putative MAPK activating protein                                        | 4.55 | 3 | 2 |   | 1 |   |  |  |
| B4DQY2_HUMAN | B4DQY2_HUMAN | B4DQY2 | cDNA FLJ59388, highly similar to Mitochondrial inner membrane protein   | 2.67 | 3 |   | 3 |   |   |  |  |
| A8K2H6_HUMAN | A8K2H6_HUMAN | A8K2H6 | Lipase                                                                  | 6.77 | 3 | 1 | 2 |   |   |  |  |
| Q53HC3_HUMAN | Q53HC3_HUMAN | Q53HC3 | Solute carrier family 25 member 3 isoform b variant (Fragment)          | 3.32 | 3 | 2 | 1 |   |   |  |  |
| B2RAH2_HUMAN | B2RAH2_HUMAN | B2RAH2 | Sodium/hydrogen exchanger                                               | 1.72 | 3 | 3 |   |   |   |  |  |
| Q59E97_HUMAN | Q59E97_HUMAN | Q59E97 | Galectin (Fragment)                                                     | 7.69 | 3 | 3 |   |   |   |  |  |
| B3KQ18_HUMAN | B3KQ18_HUMAN | B3KQ18 | cDNA FLJ32632 fis, clone SYNOV1000190, highly similar to Alpha-1,3-man  | 6.74 | 3 | 3 |   |   |   |  |  |

|              |              |        |                                                                        |      |   |   |  |  |   |  |  |
|--------------|--------------|--------|------------------------------------------------------------------------|------|---|---|--|--|---|--|--|
| Q59GD7_HUMAN | Q59GD7_HUMAN | Q59GD7 | Transporter (Fragment)                                                 | 5.72 | 3 | 3 |  |  |   |  |  |
| A8K6F0_HUMAN | A8K6F0_HUMAN | A8K6F0 | cDNA FLJ75449, highly similar to Homo sapiens aquarius homolog (mouse) | 2.09 | 2 |   |  |  | 3 |  |  |
| B4DDK3_HUMAN | B4DDK3_HUMAN | B4DDK3 | cDNA FLJ53706, highly similar to Cell cycle control protein 50A        | 5.78 | 2 |   |  |  | 3 |  |  |
| B4DMA4_HUMAN | B4DMA4_HUMAN | B4DMA4 | cDNA FLJ58400, highly similar to Cleavage stimulation factor 77 kDa su | 4.77 | 2 |   |  |  | 2 |  |  |
| B4DWZ7_HUMAN | B4DWZ7_HUMAN | B4DWZ7 | cDNA FLJ56802, highly similar to LanC-like protein 2                   | 3.01 | 2 |   |  |  | 2 |  |  |
| B7Z592_HUMAN | B7Z592_HUMAN | B7Z592 | cDNA FLJ61635, highly similar to Homo sapiens likely ortholog of mouse | 2.55 | 2 |   |  |  | 2 |  |  |
| A8K800_HUMAN | A8K800_HUMAN | A8K800 | cDNA FLJ76924, highly similar to Homo sapiens brix domain containing 1 | 2.61 | 2 |   |  |  | 2 |  |  |
| B4DQ62_HUMAN | B4DQ62_HUMAN | B4DQ62 | cDNA FLJ51935, highly similar to Butyrophilin subfamily 3 member A1    | 5.31 | 2 |   |  |  | 2 |  |  |
| A8K5S1_HUMAN | A8K5S1_HUMAN | A8K5S1 | cDNA FLJ78650, highly similar to Homo sapiens mucosa associated lympho | 2.18 | 2 |   |  |  | 2 |  |  |
| B2RDN4_HUMAN | B2RDN4_HUMAN | B2RDN4 | cDNA, FLJ96693, highly similar to Homo sapiens block of proliferation  | 2.14 | 2 |   |  |  | 2 |  |  |
| B3KX30_HUMAN | B3KX30_HUMAN | B3KX30 | cDNA FLJ44557 fis, clone UTERU3007913, highly similar to FERM domain-c | 4.95 | 2 |   |  |  | 2 |  |  |
| B7Z8T5_HUMAN | B7Z8T5_HUMAN | B7Z8T5 | cDNA FLJ53003, highly similar to Presenilin-1 (EC 3.4.23.-)            | 5.68 | 2 |   |  |  | 2 |  |  |
| B4DST3_HUMAN | B4DST3_HUMAN | B4DST3 | cDNA FLJ56487, highly similar to Methionine synthase (EC 2.1.1.13)     | 2.33 | 2 |   |  |  | 2 |  |  |
| B7Z879_HUMAN | B7Z879_HUMAN | B7Z879 | cDNA FLJ54956, highly similar to Vacuolar protein sorting 11           | 1.18 | 2 |   |  |  | 2 |  |  |

|              |              |        |                                                                         |       |   |   |   |   |   |  |  |
|--------------|--------------|--------|-------------------------------------------------------------------------|-------|---|---|---|---|---|--|--|
| F5H2D1_HUMAN | TENM2        | F5H2D1 | Teneurin-2                                                              | 0.865 | 2 |   |   |   | 2 |  |  |
| B3KRR1_HUMAN | B3KRR1_HUMAN | B3KRR1 | cDNA FLJ34725 fis, clone MESAN2005958, highly similar to RNA-binding p  | 7.08  | 2 |   |   |   | 2 |  |  |
| B7ZB52_HUMAN | B7ZB52_HUMAN | B7ZB52 | cDNA, FLJ79416, highly similar to Adapter-relatedprotein complex 4 sig  | 11.1  | 2 |   |   |   | 2 |  |  |
| B2RCZ4_HUMAN | B2RCZ4_HUMAN | B2RCZ4 | cDNA, FLJ96384, highly similar to Homo sapiens protein kinase C, iota   | 5.11  | 2 | 1 |   | 1 | 1 |  |  |
| A8K6D2_HUMAN | A8K6D2_HUMAN | A8K6D2 | cDNA FLJ76620, highly similar to Homo sapiens C2f protein (C2F), mRNA   | 4.51  | 2 |   |   | 1 | 1 |  |  |
| MK67I_HUMAN  | NIFK         | Q9BYG3 | MKI67 FHA domain-interacting nucleolar phosphoprotein (Nucleolar phosph | 4.78  | 2 | 1 |   |   | 1 |  |  |
| B2R8A2_HUMAN | B2R8A2_HUMAN | B2R8A2 | cDNA, FLJ93804, highly similar to Homo sapiens gp25L2 protein (HSGP25L  | 4.67  | 2 | 1 |   |   | 1 |  |  |
| B4DSZ1_HUMAN | B4DSZ1_HUMAN | B4DSZ1 | cDNA FLJ54877, highly similar to Syntaxin-12                            | 13.5  | 2 | 1 |   |   | 1 |  |  |
| A8K9G6_HUMAN | A8K9G6_HUMAN | A8K9G6 | cDNA FLJ75133, highly similar to Homo sapiens NACHT, leucine rich repe  | 2.93  | 2 |   |   | 2 |   |  |  |
| CCD68_HUMAN  | CCDC68       | Q9H2F9 | Coiled-coil domain-containing protein 68 (Cutaneous T-cell lymphoma-as  | 7.76  | 2 | 1 | 1 |   |   |  |  |
| B2R665_HUMAN | B2R665_HUMAN | B2R665 | cDNA, FLJ92810, highly similar to Homo sapiens protein phosphatase 1G   | 5.13  | 2 | 2 |   |   |   |  |  |
| HELZ2_HUMAN  | HELZ2        | Q9BYK8 | Helicase with zinc finger domain 2 (ATP-dependent helicase PRIC285) (H  | 1.13  | 2 | 2 |   |   |   |  |  |
| A8K1C7_HUMAN | A8K1C7_HUMAN | A8K1C7 | cDNA FLJ75179, highly similar to Homo sapiens leucine rich repeat cont  | 1.6   | 2 | 2 |   |   |   |  |  |
| B4DVT8_HUMAN | B4DVT8_HUMAN | B4DVT8 | cDNA FLJ60173, highly similar to Zinc-finger protein ZPR1               | 3.43  | 2 | 2 |   |   |   |  |  |

|              |              |        |                                                                        |       |   |   |  |  |   |  |  |
|--------------|--------------|--------|------------------------------------------------------------------------|-------|---|---|--|--|---|--|--|
| B2RC06_HUMAN | B2RC06_HUMAN | B2RC06 | cDNA, FLJ95791, highly similar to Homo sapiens aurora kinase B (AURKB) | 4.36  | 2 | 2 |  |  |   |  |  |
| A8K6Q9_HUMAN | A8K6Q9_HUMAN | A8K6Q9 | cDNA FLJ75882, highly similar to Homo sapiens spastic paraplegia 20, s | 2.25  | 2 | 2 |  |  |   |  |  |
| B4DL07_HUMAN | B4DL07_HUMAN | B4DL07 | cDNA FLJ53353, highly similar to ATP-binding cassette sub-family D mem | 1.76  | 2 | 2 |  |  |   |  |  |
| A8K2D6_HUMAN | A8K2D6_HUMAN | A8K2D6 | cDNA FLJ76011, highly similar to Homo sapiens lactamase, beta 2 (LACTB | 3.12  | 2 | 2 |  |  |   |  |  |
| A8K8X0_HUMAN | A8K8X0_HUMAN | A8K8X0 | cDNA FLJ75187, highly similar to Homo sapiens nap1 P120                | 2.37  | 2 | 2 |  |  |   |  |  |
| B3KW79_HUMAN | B3KW79_HUMAN | B3KW79 | cDNA FLJ42481 fis, clone BRACE2032090, highly similar to Probable seri | 6.93  | 2 | 2 |  |  |   |  |  |
| B2RA14_HUMAN | B2RA14_HUMAN | B2RA14 | cDNA, FLJ94653, highly similar to Homo sapiens tumor necrosis factor ( | 5.12  | 3 |   |  |  | 3 |  |  |
| B4DHK5_HUMAN | B4DHK5_HUMAN | B4DHK5 | cDNA FLJ61590, moderately similar to Pleckstrin homology domain-contai | 0.845 | 2 |   |  |  | 2 |  |  |
| A8K940_HUMAN | A8K940_HUMAN | A8K940 | cDNA FLJ77630, highly similar to Homo sapiens BPY2 interacting protein | 1.23  | 2 |   |  |  | 2 |  |  |
| Q53G69_HUMAN | Q53G69_HUMAN | Q53G69 | Translocase of inner mitochondrial membrane 44 homolog (Fragment)      | 2.65  | 1 |   |  |  | 1 |  |  |
| B4DEA6_HUMAN | B4DEA6_HUMAN | B4DEA6 | cDNA FLJ56566, highly similar to Small glutamine-rich tetratricopeptid | 4.81  | 1 |   |  |  | 1 |  |  |
| B2RDV7_HUMAN | B2RDV7_HUMAN | B2RDV7 | cDNA, FLJ96789, highly similar to Homo sapiens dihydrouridine synthase | 2     | 1 |   |  |  | 1 |  |  |
| A8K874_HUMAN | A8K874_HUMAN | A8K874 | cDNA FLJ77588, highly similar to Homo sapiens MAK10 homolog, amino-aci | 1.1   | 1 |   |  |  | 1 |  |  |
| B2RD46_HUMAN | B2RD46_HUMAN | B2RD46 | cDNA, FLJ96449                                                         | 1.98  | 1 |   |  |  | 1 |  |  |

|              |                |        |                                                                        |       |   |  |   |   |   |  |  |
|--------------|----------------|--------|------------------------------------------------------------------------|-------|---|--|---|---|---|--|--|
| B4DNG0_HUMAN | B4DNG0_HUMAN   | B4DNG0 | cDNA FLJ58142, highly similar to Olfactomedin-like protein 3           | 3.48  | 1 |  |   |   | 1 |  |  |
| Q59HG1_HUMAN | Q59HG1_HUMAN   | Q59HG1 | Chromosome-associated kinesin KIF4A variant (Fragment)                 | 0.729 | 1 |  |   |   | 1 |  |  |
| B4E1D9_HUMAN | B4E1D9_HUMAN   | B4E1D9 | cDNA FLJ55318, highly similar to Casein kinase I isoform alpha (EC 2.7 | 5.7   | 1 |  |   |   | 1 |  |  |
| B4E256_HUMAN | B4E256_HUMAN   | B4E256 | cDNA FLJ55348, highly similar to WD repeat protein 6                   | 1.31  | 1 |  |   |   | 1 |  |  |
| A2A2Q9_HUMAN | AAR2           | A2A2Q9 | Protein AAR2 homolog                                                   | 4.02  | 1 |  |   |   | 1 |  |  |
| B2RCM6_HUMAN | B2RCM6_HUMAN   | B2RCM6 | cDNA, FLJ96161                                                         | 3.56  | 1 |  |   |   | 1 |  |  |
| A8K503_HUMAN | A8K503_HUMAN   | A8K503 | cDNA FLJ76182, highly similar to Homo sapiens ubiquitin-conjugating en | 5.06  | 1 |  |   |   | 1 |  |  |
| Q8WWH9_HUMAN | Q8WWH9_HUMAN   | Q8WWH9 | Amphiphysin Iib-1                                                      | 1.43  | 1 |  |   |   | 1 |  |  |
| B7Z4W4_HUMAN | B7Z4W4_HUMAN   | B7Z4W4 | cDNA FLJ50817, highly similar to UV excision repair protein RAD23 homo | 2.06  | 1 |  |   |   | 1 |  |  |
| B4DK32_HUMAN | B4DK32_HUMAN   | B4DK32 | cDNA FLJ61095, highly similar to Ubiquitin conjugation factor E4 A (Fr | 1.15  | 1 |  |   |   | 1 |  |  |
| Q63HL4_HUMAN | DKFZp686G04235 | Q63HL4 | NADPH--cytochrome P450 reductase (EC 1.6.2.4)                          | 1.32  | 1 |  |   | 1 |   |  |  |
| T132B_HUMAN  | TMEM132B       | Q14DG7 | Transmembrane protein 132B                                             | 0.928 | 1 |  |   | 1 |   |  |  |
| A8K6V6_HUMAN | A8K6V6_HUMAN   | A8K6V6 | cDNA FLJ75883, highly similar to Homo sapiens glucosamine (N-acetyl)-6 | 2.17  | 1 |  | 1 |   |   |  |  |
| B3KPC7_HUMAN | B3KPC7_HUMAN   | B3KPC7 | Actin-related protein 2/3 complex subunit 5                            | 8.5   | 1 |  | 1 |   |   |  |  |
| B2R838_HUMAN | B2R838_HUMAN   | B2R838 | cDNA, FLJ93726, highly similar to Homo sapiens ras homolog gene family | 5.33  | 1 |  | 1 |   |   |  |  |

|              |                  |        |                                                                        |      |   |   |  |  |  |  |
|--------------|------------------|--------|------------------------------------------------------------------------|------|---|---|--|--|--|--|
| A8K9U4_HUMAN | A8K9U4_HUMAN     | A8K9U4 | cDNA FLJ77205, highly similar to Homo sapiens hect domain and RLD 4 (H | 1.17 | 1 | 1 |  |  |  |  |
| B3KY30_HUMAN | B3KY30_HUMAN     | B3KY30 | cDNA FLJ46699 fis, clone TRACH3013700, highly similar to Stress 70 pro | 4.56 | 2 | 2 |  |  |  |  |
| B4DNZ1_HUMAN | B4DNZ1_HUMAN     | B4DNZ1 | cDNA FLJ53633, highly similar to Transmembrane BAX inhibitor motif-con | 5.62 | 2 | 2 |  |  |  |  |
| B3KNI2_HUMAN | B3KNI2_HUMAN     | B3KNI2 | cDNA FLJ14650 fis, clone NT2RP2002185, highly similar to Ubiquilin-1   | 2.72 | 2 | 2 |  |  |  |  |
| B3KM97_HUMAN | B3KM97_HUMAN     | B3KM97 | cDNA FLJ10554 fis, clone NT2RP2002385, highly similar to Synaptic glyc | 3.9  | 1 | 1 |  |  |  |  |
| A8K2Q6_HUMAN | A8K2Q6_HUMAN     | A8K2Q6 | Peptidyl-prolyl cis-trans isomerase (EC 5.2.1.8)                       | 6.13 | 1 | 1 |  |  |  |  |
| A8K7T4_HUMAN | A8K7T4_HUMAN     | A8K7T4 | cDNA FLJ75774, highly similar to Homo sapiens lectin, mannose-binding  | 3.65 | 1 | 1 |  |  |  |  |
| B2R8K8_HUMAN | B2R8K8_HUMAN     | B2R8K8 | cDNA, FLJ93949, highly similar to Homo sapiens NIMA (never in mitosis  | 2.65 | 1 | 1 |  |  |  |  |
| B7Z3E3_HUMAN | B7Z3E3_HUMAN     | B7Z3E3 | Reticulon                                                              | 1.41 | 1 | 1 |  |  |  |  |
| B3KSG7_HUMAN | B3KSG7_HUMAN     | B3KSG7 | cDNA FLJ36171 fis, clone TESTI2026215, highly similar to Homo sapiens  | 1.47 | 1 | 1 |  |  |  |  |
| E7ENX8_HUMAN | E7ENX8_HUMAN     | E7ENX8 | Uncharacterized protein (Fragment)                                     | 2.02 | 1 | 1 |  |  |  |  |
| B7Z6K2_HUMAN | B7Z6K2_HUMAN     | B7Z6K2 | cDNA FLJ58625, highly similar to Polypeptide N-acetylgalactosaminyltra | 3.19 | 1 | 1 |  |  |  |  |
| M1VE83_HUMAN | SDC4-ROS1_S4;R34 | M1VE83 | Tyrosine-protein kinase receptor (EC 2.7.10.1)                         | 1.56 | 1 | 1 |  |  |  |  |
| B7ZW70_HUMAN | LOC727761        | B7ZW70 | LOC727761 protein                                                      | 5.85 | 1 | 1 |  |  |  |  |



|              |              |        |                                                                        |      |   |   |  |  |  |  |  |
|--------------|--------------|--------|------------------------------------------------------------------------|------|---|---|--|--|--|--|--|
| B7Z8X5_HUMAN | B7Z8X5_HUMAN | B7Z8X5 | cDNA FLJ61541, highly similar to Homo sapiens PDZ and LIM domain 5 (PD | 2.07 | 1 | 1 |  |  |  |  |  |
| A8K3J8_HUMAN | A8K3J8_HUMAN | A8K3J8 | cDNA FLJ75332, highly similar to Homo sapiens Ras-related associated w | 3.57 | 1 | 1 |  |  |  |  |  |

**Table S5. Immune-associated proteins in mesothelioma-derived exosomes.**

|                                                      | Gene Name     | Protein Accession | Protein Description                                                    | SpC Combined (4 cell lines) | Vesiclepedia comparison (BC, DC, TC) | Mesothelioma exosome cancer signature (mEXOS) |
|------------------------------------------------------|---------------|-------------------|------------------------------------------------------------------------|-----------------------------|--------------------------------------|-----------------------------------------------|
| <i>Antigen processing and presentation (general)</i> | TNC           | Q4LE33            | TNC variant protein (Fragment)                                         | 16                          |                                      |                                               |
|                                                      | TGFB1         | Q15582            | Transforming growth factor-beta-induced protein ig-h3 (Beta ig-h3) (Ke | 112                         |                                      |                                               |
|                                                      | CYFIP1        | Q7L576            | Cytoplasmic FMR1-interacting protein 1 (Specifically Rac1-associated p | 115                         | B cells                              |                                               |
|                                                      | EPB41L2       | O43491            | Band 4.1-like protein 2 (Generally expressed protein 4.1) (4.1G)       | 76                          | B cells                              |                                               |
|                                                      | SPTBN1        | Q01082            | Spectrin beta chain, non-erythrocytic 1 (Beta-II spectrin) (Fodrin bet | 105                         | B cells                              |                                               |
|                                                      | A8K766_HUMAN  | A8K766            | cDNA FLJ77343, highly similar to Homo sapiens electron-transfer-flavop | 28                          |                                      | Y                                             |
|                                                      | B7Z6S9_HUMAN  | B7Z6S9            | cDNA FLJ56157, highly similar to Glucosylceramidase (EC 3.2.1.45)      | 7                           |                                      | Y                                             |
|                                                      | AASDHPPT      | Q9NRN7            | L-aminoadipate-semialdehyde dehydrogenase-phosphopantetheinyl transfer | 6                           |                                      |                                               |
|                                                      | OSMR          | Q99650            | Oncostatin-M-specific receptor subunit beta (Interleukin-31 receptor s | 2                           |                                      | Y                                             |
|                                                      | STRN          | O43815            | Striatin                                                               | 2                           |                                      |                                               |
|                                                      | Q9NXW1_HUMAN  | Q9NXW1            | BJ-HCC-24 tumor antigen (CDNA FLJ20030 fis, clone ADSU02156)           | 6                           |                                      | Y                                             |
| <i>Antigen processing and presentation (MHC I)</i>   | CCT2          | P78371            | T-complex protein 1 subunit beta (TCP-1-beta) (CCT-beta)               | 126                         | B cells                              |                                               |
|                                                      | PLS3          | P13797            | Plastin-3 (T-plastin)                                                  | 125                         |                                      |                                               |
|                                                      | Q53HU0_HUMAN  | Q53HU0            | Chaperonin containing TCP1, subunit 8 (Theta) variant (Fragment)       | 103                         |                                      | Y                                             |
|                                                      | A8K590_HUMAN  | A8K590            | cDNA FLJ77456, highly similar to Homo sapiens interleukin enhancer bin | 40                          |                                      | Y                                             |
|                                                      | FAM120A       | Q9NZB2            | Constitutive coactivator of PPAR-gamma-like protein 1 (Oxidative stres | 20                          |                                      |                                               |
|                                                      | CTNND1        | C9JZR2            | Catenin delta-1                                                        | 88                          |                                      |                                               |
|                                                      | ACO1          | P21399            | Cytoplasmic aconitate hydratase (Aconitase) (EC 4.2.1.3) (Citrate hydr | 41                          |                                      |                                               |
|                                                      | ATP2B4        | P23634            | Plasma membrane calcium-transporting ATPase 4 (PMCA4) (EC 3.6.3.8) (Ma | 64                          | T cells                              |                                               |
|                                                      | PDHB          | P11177            | Pyruvate dehydrogenase E1 component subunit beta, mitochondrial (PDHE1 | 30                          |                                      |                                               |
|                                                      | RPL12         | P30050            | 60S ribosomal protein L12                                              | 44                          | B cells                              |                                               |
|                                                      | GALE          | Q14376            | UDP-glucose 4-epimerase (EC 5.1.3.2) (Galactowaldenase) (UDP-galactose | 36                          |                                      |                                               |
|                                                      | KIAA1199      | Q8WUJ3            | Protein KIAA1199                                                       | 43                          |                                      |                                               |
|                                                      | MICAL1        | Q8TDZ2            | Protein-methionine sulfoxide oxidase MICAL1                            | 5                           |                                      |                                               |
|                                                      | MAP4K4        | G5E948            | Mitogen-activated protein kinase kinase kinase 4 (Mitogen-activ        | 37                          |                                      |                                               |
|                                                      | Q53FT8_HUMAN  | Q53FT8            | Proteasome subunit beta type (EC 3.4.25.1) (Fragment)                  | 69                          |                                      | Y                                             |
|                                                      | DKFZp586I1223 | Q9UG64            | Putative uncharacterized protein DKFZp586I1223 (Fragment)              | 4                           |                                      | Y                                             |
|                                                      | DIP2B         | Q9P265            | Disco-interacting protein 2 homolog B (DIP2 homolog B)                 | 40                          | B cells                              |                                               |
|                                                      | B4E2S3_HUMAN  | B4E2S3            | cDNA FLJ56561                                                          | 53                          |                                      | Y                                             |
|                                                      | DNMT1         | P26358            | DNA (cytosine-5)-methyltransferase 1 (Dnmt1) (EC 2.1.1.37) (CXXC-type  | 4                           |                                      |                                               |
|                                                      | FAM49B        | Q9NUQ9            | Protein FAM49B (L1)                                                    | 52                          | B cells                              |                                               |

|  |              |        |                                                                        |     |         |   |
|--|--------------|--------|------------------------------------------------------------------------|-----|---------|---|
|  | A8K0J3_HUMAN | A8K0J3 | cDNA FLJ76732, highly similar to Homo sapiens TAO kinase 3 (TAOK3), mR | 14  |         | Y |
|  | USP9X        | Q93008 | Probable ubiquitin carboxyl-terminal hydrolase FAF-X (EC 3.4.19.12) (D | 26  | B cells |   |
|  | AK4          | P27144 | Adenylate kinase 4, mitochondrial (AK 4) (EC 2.7.4.10) (EC 2.7.4.6) (A | 11  |         |   |
|  | ABCC1        | P33527 | Multidrug resistance-associated protein 1 (ATP-binding cassette sub-fa | 90  | B cells |   |
|  | HSPH1        | Q92598 | Heat shock protein 105 kDa (Antigen NY-CO-25) (Heat shock 110 kDa prot | 38  | B cells |   |
|  | KIAA1033     | B7ZKT9 | KIAA1033 protein                                                       | 16  |         |   |
|  | SLC7A5       | Q01650 | Large neutral amino acids transporter small subunit 1 (4F2 light chain | 31  | B cells |   |
|  | ACACA        | Q13085 | Acetyl-CoA carboxylase 1 (ACCI) (EC 6.4.1.2) (ACC-alpha) [Includes: Bi | 44  |         |   |
|  | PTGFRN       | Q9P2B2 | Prostaglandin F2 receptor negative regulator (CD9 partner 1) (CD9P-1)  | 54  |         |   |
|  | ALDH1A3      | P47895 | Aldehyde dehydrogenase family 1 member A3 (EC 1.2.1.5) (Aldehyde dehyd | 56  |         |   |
|  | DYNC1H1      | Q14204 | Cytoplasmic dynein 1 heavy chain 1 (Cytoplasmic dynein heavy chain 1)  | 750 | B cells |   |
|  | SNRNP200     | O75643 | U5 small nuclear ribonucleoprotein 200 kDa helicase (EC 3.6.4.13) (Act | 81  |         |   |
|  | ACLY         | Q4LE36 | ACLY variant protein (Fragment)                                        | 473 | B cells |   |
|  | GNB2L1       | P63244 | Guanine nucleotide-binding protein subunit beta-2-like 1 (Cell prolife | 80  | B cells |   |
|  | SF3B1        | O75533 | Splicing factor 3B subunit 1 (Pre-mRNA-splicing factor SF3b 155 kDa su | 42  |         |   |
|  | RPL3         | P39023 | 60S ribosomal protein L3 (HIV-1 TAR RNA-binding protein B) (TARBP-B)   | 26  | B cells |   |
|  | A8K9V7_HUMAN | A8K9V7 | cDNA FLJ77207                                                          | 75  |         | Y |
|  | CPNE1        | B0QZ18 | Copine-1 (HCG38213, isoform CRA_b)                                     | 46  | B cells |   |
|  | ALDH18A1     | P54886 | Delta-1-pyrroline-5-carboxylate synthase (P5CS) (Aldehyde dehydrogenas | 31  |         |   |
|  | RPS10        | P46783 | 40S ribosomal protein S10                                              | 37  | B cells |   |
|  | B3KTQ2_HUMAN | B3KTQ2 | cDNA FLJ38589 fis, clone HCHON2010074, highly similar to LACTADHERIN   | 105 |         | Y |
|  | PLIN3        | O60664 | Perilipin-3 (47 kDa mannose 6-phosphate receptor-binding protein) (47  | 19  |         |   |
|  | FAM120C      | Q9NX05 | Constitutive coactivator of PPAR-gamma-like protein 2 (Protein FAM120C | 6   |         |   |
|  | PSMD8        | K7EJC1 | 26S proteasome non-ATPase regulatory subunit 8                         | 9   |         |   |
|  | RAC2         | P15153 | Ras-related C3 botulinum toxin substrate 2 (GX) (Small G protein) (p21 | 16  | B cells |   |
|  | MOCOS        | Q96EN8 | Molybdenum cofactor sulfurase (MCS) (MOS) (MoCo sulfurase) (hMCS) (EC  | 2   |         |   |
|  | STX3         | F8W9Y0 | Syntaxin-3                                                             | 10  |         |   |
|  | COX2         | I6N6Q6 | Cytochrome c oxidase subunit 2                                         | 4   |         | Y |
|  | QSOX2        | Q6ZRP7 | Sulfhydryl oxidase 2 (EC 1.8.3.2) (Neuroblastoma-derived sulfhydryl ox | 4   |         |   |
|  | TOR2A        | Q5JU69 | Torsin-2A (Torsin family 2 member A) (Torsin-related protein 1)        | 5   |         |   |
|  | C5orf51      | A6NDU8 | UPF0600 protein C5orf51                                                | 4   |         |   |
|  | EEF1A1       | P68104 | Elongation factor 1-alpha 1 (EF-1-alpha-1) (Elongation factor Tu) (EF- | 265 | B cells |   |
|  | B4E1G2_HUMAN | B4E1G2 | Serine hydroxymethyltransferase (EC 2.1.2.1)                           | 59  |         | Y |
|  | EIF3M        | Q7L2H7 | Eukaryotic translation initiation factor 3 subunit M (eIF3m) (Fetal lu | 26  |         |   |
|  | PLAU         | E7ESM2 | Urokinase-type plasminogen activator chain B                           | 36  |         |   |
|  | RPS18        | P62269 | 40S ribosomal protein S18 (Ke-3) (Ke3)                                 | 24  | T cells |   |

|                         |               |        |                                                                           |     |         |   |
|-------------------------|---------------|--------|---------------------------------------------------------------------------|-----|---------|---|
|                         | VTN           | P04004 | Vitronectin (VN) (S-protein) (Serum-spreading factor) (V75) [Cleaved i    | 27  |         |   |
|                         | TBCE          | B7Z3P1 | Tubulin-specific chaperone E (cDNA FLJ59210, highly similar to Tubulin    | 13  |         |   |
|                         | DKFZp781L0540 | Q7Z3K9 | Putative uncharacterized protein DKFZp781L0540 (Fragment)                 | 9   |         | Y |
|                         | ISYNA1        | Q9NPH2 | Inositol-3-phosphate synthase 1 (IPS 1) (EC 5.5.1.4) (Myo-inositol 1-p    | 13  |         |   |
|                         | B7Z2A1_HUMAN  | B7Z2A1 | cDNA FLJ56068, highly similar to DNA damage-binding protein 1             | 23  |         | Y |
|                         | SORD          | Q00796 | Sorbitol dehydrogenase (EC 1.1.1.14) (L-iditol 2-dehydrogenase)           | 14  |         |   |
|                         | RAB3GAP2      | Q9H2M9 | Rab3 GTPase-activating protein non-catalytic subunit (RGAP-iso) (Rab3     | 4   |         |   |
|                         | CMTM6         | Q9NX76 | CKLF-like MARVEL transmembrane domain-containing protein 6<br>(Chemokine- | 8   | T cells |   |
|                         | A2M           | P01023 | Alpha-2-macroglobulin (Alpha-2-M) (C3 and PZP-like alpha-2-macroglobul    | 10  | B cells |   |
|                         | AKR1B1        | P15121 | Aldose reductase (AR) (EC 1.1.1.21) (Aldehyde reductase) (Aldo-keto re    | 12  | B cells |   |
|                         | COMMD3        | Q9UBI1 | COMM domain-containing protein 3 (Protein Bup) (Protein PIL)              | 7   |         |   |
|                         | Q59FU8_HUMAN  | Q59FU8 | Tumor necrosis factor receptor superfamily, member 6 isoform 1 variant    | 4   |         | Y |
|                         | B2R694_HUMAN  | B2R694 | cDNA, FLJ92849, highly similar to Homo sapiens lanosterol synthase (2,    | 3   |         | Y |
|                         | TOR1B         | O14657 | Torsin-1B (Torsin family 1 member B)                                      | 4   |         |   |
|                         | STX7          | O15400 | Syntaxin-7                                                                | 3   | B cells |   |
|                         | IFI35         | P80217 | Interferon-induced 35 kDa protein (IFP 35) (Ifi-35)                       | 8   |         |   |
| <i>B cell response</i>  | ITGB1         | P05556 | Integrin beta-1 (Fibronectin receptor subunit beta) (Glycoprotein IIa)    | 149 | T cells |   |
|                         | VTN           | P04004 | Vitronectin (VN) (S-protein) (Serum-spreading factor) (V75) [Cleaved i    | 27  |         |   |
|                         | Q59FB9_HUMAN  | Q59FB9 | Toll interacting protein variant (Fragment)                               | 7   |         | Y |
| <i>NK cell response</i> | TUBB          | P07437 | Tubulin beta chain (Tubulin beta-5 chain)                                 | 637 | B cells |   |
|                         | ACSL4         | O60488 | Long-chain-fatty-acid--CoA ligase 4 (EC 6.2.1.3) (Long-chain acyl-CoA     | 102 | B cells |   |
|                         | B2RDF5_HUMAN  | B2RDF5 | SUMO-1 activating enzyme                                                  | 26  |         | Y |
|                         | B2R9L6_HUMAN  | B2R9L6 | cDNA, FLJ94450, highly similar to Homo sapiens cyclin-dependent kinase    | 10  |         | Y |
| <i>T cell response</i>  | A8K9A4_HUMAN  | A8K9A4 | cDNA FLJ75154, highly similar to Homo sapiens heterogeneous nuclear ri    | 72  |         | Y |
|                         | HSD17B10      | Q99714 | 3-hydroxyacyl-CoA dehydrogenase type-2 (EC 1.1.1.35) (17-beta-hydroxys    | 38  |         |   |
|                         | ESYT2         | H7BXI1 | Extended synaptotagmin-2 (Fragment)                                       | 4   |         |   |
|                         | TNS3          | E7ERH3 | Tensin-3                                                                  | 11  |         |   |
|                         | LARP1         | Q6PKG0 | La-related protein 1 (La ribonucleoprotein domain family member 1)        | 7   |         |   |
|                         | GNE           | Q9Y223 | Bifunctional UDP-N-acetylglucosamine 2-epimerase/N-acetylmannosamine k    | 7   |         |   |
|                         | UFL1          | O94874 | E3 UFM1-protein ligase 1 (EC 6.3.2.-) (LZAP-binding protein)              | 3   |         |   |
|                         | CNN2          | B4DDF4 | Calponin-2 (cDNA FLJ52469, highly similar to Calponin-2)                  | 10  |         |   |
|                         | TCIRG1        | Q13488 | V-type proton ATPase 116 kDa subunit a isoform 3 (V-ATPase 116 kDa iso    | 2   |         |   |
|                         | TTI1          | O43156 | TELO2-interacting protein 1 homolog (Protein SMG10)                       | 8   |         |   |
|                         | KIF11         | P52732 | Kinesin-like protein KIF11 (Kinesin-like protein 1) (Kinesin-like spin    | 2   |         |   |
|                         | B2RCP7_HUMAN  | B2RCP7 | cDNA, FLJ96197, highly similar to Homo sapiens connective tissue growt    | 3   |         | Y |
|                         | KIAA2013      | Q8IYS2 | Uncharacterized protein KIAA2013                                          | 3   |         |   |
|                         | IQGAP1        | P46940 | Ras GTPase-activating-like protein IQGAP1                                 | 418 |         |   |

|                                 |       |        |                                                               |     |  |   |
|---------------------------------|-------|--------|---------------------------------------------------------------|-----|--|---|
| <i>Other related components</i> | STAT1 | P42224 | Signal transducer and activator of transcription 1-alpha/beta | 139 |  |   |
|                                 | MX1   | P20591 | Interferon-induced GTP-binding protein Mx1                    | 84  |  |   |
|                                 | CLIC4 | Q9Y696 | Chloride intracellular channel protein 4                      | 45  |  |   |
|                                 | IFIT1 | P09914 | Interferon-induced protein with tetratricopeptide repeats 1   | 36  |  | Y |
|                                 | WARS  | P23381 | Tryptophan--tRNA ligase, cytoplasmic                          | 32  |  |   |
|                                 | MX2   | P20592 | Interferon-induced GTP-binding protein Mx2                    | 30  |  | Y |
|                                 | OAS2  | P29728 | 2'-5'-oligoadenylate synthase 2 ((2-5')oligo(A) synthase 2)   | 13  |  |   |
